# Supplementary material for: Transcriptional Profiling of Melanoma Sentinel Nodes Identify Patients with Poor Outcome and Reveal an Association of CD30+ T Lymphocytes with Progression
Source: Oxford University Press journal article supplement (doi:10.1158/0008-5472.can-13-1672), 2014-01-01
Supplement: 00085472can131672-sup-fig3.pdf [file 00085472can131672-sup-fig3.pdf]

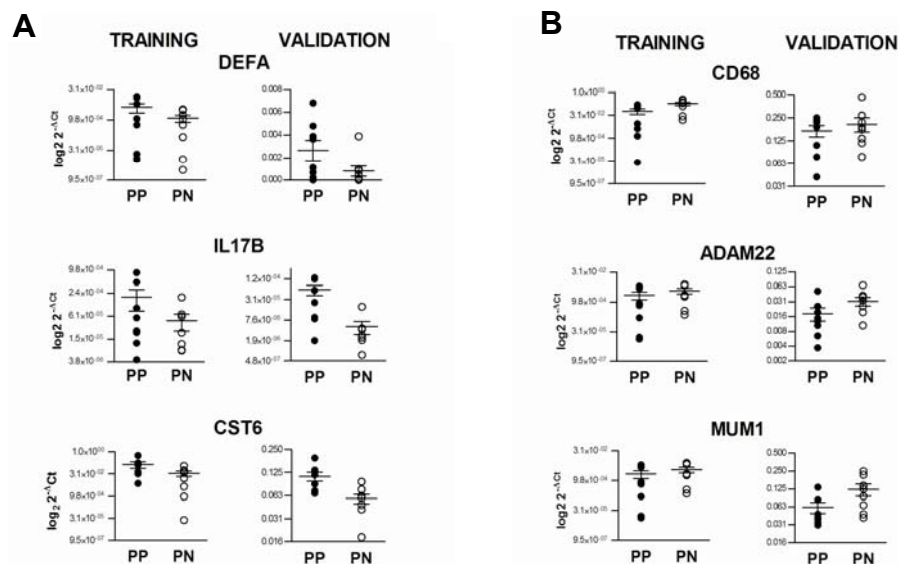

**Supplementary Figure S3. Comparative gene expression analysis by qRT-PCR of the genes that were differentially expressed between the PP and the PN groups. A. Genes upregulated in the PP samples (*DEFA1*, *IL17B*, and *CST6*) ( $p < 0.05$ ). B. Genes upregulated in the PN samples (*CD68*, *MUM1*, and *ADAM22*) ( $p < 0.05$ ). The graphs display the results obtained using the training and validation samples. The relative quantification for each sample was determined using  $2^{-\Delta C_t}$ , and RPL13A was used as an internal reference.**
