# Supplementary material for: Transcriptional Profiling of Melanoma Sentinel Nodes Identify Patients with Poor Outcome and Reveal an Association of CD30+ T Lymphocytes with Progression
Source: Oxford University Press journal article supplement (doi:10.1158/0008-5472.can-13-1672), 2014-01-01
Supplement: 00085472can131672-sup-tab2.xlsx [file 00085472can131672-sup-tab2.xlsx]

## Sheet: Supplementary Table S2
Supplementary Table S2. Differentially expressed gene lists.
A. List of the 3078 genes showing differential expression between the PP and PN+N
Probe	Gene Symbol	Entrez Gene Name	p-value	FDR	Fold-Change
ILMN_1770711	TNFRSF8	tumor necrosis factor receptor superfamily, member 8	5.09302e-08	0.000119686	4.54285
ILMN_2334204	ERCC6L	excision repair cross-complementing rodent repair deficiency, complementation group 6-like	2.29308e-06	0.000646085	4.30785
ILMN_1721916	PRR23B	proline rich 23B	0.00022045	0.0062107	4.25771
ILMN_1731349	HOXA13	homeobox A13	6.83767e-06	0.0011799	4.24089
ILMN_1769471	C21orf58	chromosome 21 open reading frame 58	3.8819e-05	0.00263296	4.1975
ILMN_1694346	CRHR2	corticotropin releasing hormone receptor 2	8.12765e-06	0.00129755	4.13227
ILMN_1651597	FBXO44	F-box protein 44	5.09998e-08	0.000119686	4.0853
ILMN_2131447	LRRC3B	leucine rich repeat containing 3B	0.000129073	0.00463192	4.04112
ILMN_1703370	ZDHHC12	zinc finger, DHHC-type containing 12	0.000314981	0.0075921	3.92352
ILMN_1741055	NUP210L	nucleoporin 210kDa-like	3.06708e-05	0.00239469	3.9088
ILMN_2200915	C6orf159	ripply2 homolog (zebrafish)	2.4083e-07	0.00028259	3.86044
ILMN_1706969	C6orf65	BEN domain containing 6	4.58142e-05	0.00288482	3.8508
ILMN_1751432	OR9K2	olfactory receptor, family 9, subfamily K, member 2	0.000553641	0.0103814	3.83625
ILMN_2145490	C15orf60	chromosome 15 open reading frame 60	1.98742e-06	0.000636224	3.82789
ILMN_1681526	SLC5A1	solute carrier family 5 (sodium/glucose cotransporter), member 1	5.59618e-05	0.00318765	3.7824
ILMN_1709541	ATP2A1	ATPase, Ca++ transporting, cardiac muscle, fast twitch 1	6.83726e-06	0.0011799	3.77914
ILMN_1737096	CLDN10	claudin 10	0.000905151	0.0139264	3.74631
ILMN_2368856	KCNIP1	Kv channel interacting protein 1	3.48696e-09	3.32345e-05	3.69915
ILMN_1722755	KRTAP6-2	keratin associated protein 6-2	0.000654554	0.011602	3.67916
ILMN_2100574	CRYGD	crystallin, gamma D	0.000334832	0.00787357	3.65841
ILMN_1727975	SNTG1	syntrophin, gamma 1	0.000329678	0.00780715	3.62618
ILMN_1698666	CST6	cystatin E/M	8.6809e-07	0.000442877	3.62542
ILMN_1714841	OR4D9	olfactory receptor, family 4, subfamily D, member 9	0.000175681	0.00545074	3.6245
ILMN_1803291	OR4C45	olfactory receptor, family 4, subfamily C, member 45	4.89212e-06	0.000989218	3.61938
ILMN_2167808	TM4SF5	transmembrane 4 L six family member 5	0.0019336	0.0222779	3.60333
ILMN_1688938	KCNRG	potassium channel regulator	0.000186648	0.00563941	3.59772
ILMN_1665319	NRTN	neurturin	0.00225692	0.0245097	3.56614
ILMN_2213693	OR1S2	olfactory receptor, family 1, subfamily S, member 2	0.00126396	0.0171709	3.5566
ILMN_2149815	CYP2F1	cytochrome P450, family 2, subfamily F, polypeptide 1	7.51166e-05	0.00356129	3.52247
ILMN_2307407	C6orf25	chromosome 6 open reading frame 25	0.000385552	0.00840905	3.49384
ILMN_1794501	HAS3	hyaluronan synthase 3	0.0001494	0.00495215	3.48941
ILMN_1799942	OR4F15	olfactory receptor, family 4, subfamily F, member 15	6.6422e-05	0.00341554	3.4679
ILMN_1744293	MUPCDH	cadherin-related family member 5	0.000256589	0.00676587	3.45563
ILMN_1699803	SP8	Sp8 transcription factor	0.000329261	0.00780515	3.45156
ILMN_1783969	FAM24A	family with sequence similarity 24, member A	0.000727197	0.012313	3.45089
ILMN_1667577	LCMT2	leucine carboxyl methyltransferase 2	0.00421654	0.037103	3.41899
ILMN_1802701	OR4N3P	olfactory receptor, family 4, subfamily N, member 3 pseudogene	1.71058e-05	0.00181506	3.4056
ILMN_1655565	UGT3A2	UDP glycosyltransferase 3 family, polypeptide A2	0.00241854	0.0254899	3.38941
ILMN_1770493	CCDC37	coiled-coil domain containing 37	0.000813069	0.0130246	3.38031
ILMN_1791721	KRTAP21-2	keratin associated protein 21-2	0.00166077	0.0201317	3.37843
ILMN_1661282	FRMPD2	FERM and PDZ domain containing 2	0.00235009	0.0251033	3.37593
ILMN_1727272	CCT8L2	chaperonin containing TCP1, subunit 8 (theta)-like 2	0.00106976	0.0154936	3.37019
ILMN_1665132	CD36	CD36 molecule (thrombospondin receptor)	0.00227098	0.0245822	3.35951
ILMN_1728301	GAD2	glutamate decarboxylase 2 (pancreatic islets and brain, 65kDa)	0.00259329	0.0267749	3.35138
ILMN_1728894	OR4A5	olfactory receptor, family 4, subfamily A, member 5	0.00512509	0.0420986	3.33638
ILMN_1717557	LECT2	leukocyte cell-derived chemotaxin 2	8.9164e-05	0.00388571	3.33361
ILMN_1695530	MS4A3	membrane-spanning 4-domains, subfamily A, member 3 (hematopoietic cell-specific)	0.000131277	0.00464381	3.32236
ILMN_2249551	NRF1	nuclear respiratory factor 1	0.00369161	0.0339478	3.3131
ILMN_1675268	LRP4	low density lipoprotein receptor-related protein 4	0.000721286	0.0122572	3.31009
ILMN_2049274	ARHGDIG	Rho GDP dissociation inhibitor (GDI) gamma	2.13663e-05	0.00203006	3.30575
ILMN_1690693	CTPS2	CTP synthase II	0.000277489	0.00711707	3.29911
ILMN_1775138	ZIM2	zinc finger, imprinted 2	0.000510856	0.00989016	3.28383
ILMN_1704241	OR52A4	olfactory receptor, family 52, subfamily A, member 4	0.000168977	0.00532881	3.27781
ILMN_1694956	SCN5A	sodium channel, voltage-gated, type V, alpha subunit	0.00429867	0.0375774	3.26887
ILMN_1704245	MYO18B	myosin XVIIIB	0.00309677	0.0301306	3.26836
ILMN_1793241	SRD5A1	steroid-5-alpha-reductase, alpha polypeptide 1 (3-oxo-5 alpha-steroid delta 4-dehydrogenase alpha 1)	0.00126374	0.0171709	3.26768
ILMN_2261600	FCGR1B	Fc fragment of IgG, high affinity Ib, receptor (CD64)	8.8114e-05	0.00385476	3.26601
ILMN_2405592	TMEM93	transmembrane protein 93	5.22894e-06	0.0010312	3.25945
ILMN_2178771	DMRTC2	DMRT-like family C2	4.01179e-05	0.00265208	3.25684
ILMN_1661825	TNFRSF6B	tumor necrosis factor receptor superfamily, member 6b, decoy	0.000383773	0.00837937	3.25577
ILMN_2043845	IMPACT	Impact homolog (mouse)	0.000554724	0.0103814	3.23873
ILMN_2283245	C9orf84	chromosome 9 open reading frame 84	9.43721e-05	0.00402677	3.21277
ILMN_1746194	DUSP21	dual specificity phosphatase 21	0.00142197	0.0183255	3.21052
ILMN_1653766	CCL24	chemokine (C-C motif) ligand 24	0.000245654	0.00658105	3.20275
ILMN_1747943	ZNF695	zinc finger protein 695	0.000245233	0.00657729	3.20245
ILMN_1743226	OR52I1	olfactory receptor, family 52, subfamily I, member 1	0.000674256	0.0117851	3.20192
ILMN_1757562	MPG	N-methylpurine-DNA glycosylase	0.00481873	0.0403879	3.19096
ILMN_1728972	FAM64A	family with sequence similarity 64, member A	0.00286444	0.0287769	3.18854
ILMN_2370019	PPP4R4	protein phosphatase 4, regulatory subunit 4	0.00180432	0.0212178	3.18623
ILMN_1797063	TRHDE	thyrotropin-releasing hormone degrading enzyme	0.00370781	0.03403	3.18464
ILMN_1670134	FADS1	fatty acid desaturase 1	0.00090124	0.0139055	3.18288
ILMN_1730867	AZU1	azurocidin 1	0.0010916	0.0157114	3.17231
ILMN_2357062	IL1RAP	interleukin 1 receptor accessory protein	0.000123123	0.00454237	3.17121
ILMN_1661631	LILRA3	leukocyte immunoglobulin-like receptor, subfamily A (without TM domain), member 3	6.75456e-05	0.00343108	3.17068
ILMN_1729367	SLC7A5P1	solute carrier family 7 (cationic amino acid transporter, y+ system), member 5 pseudogene 1	0.00151843	0.019066	3.16624
ILMN_2225887	ATP5EP2	ATP synthase, H+ transporting, mitochondrial F1 complex, epsilon subunit pseudogene 2	0.0034884	0.0326549	3.15645
ILMN_1731717	OR10G8	olfactory receptor, family 10, subfamily G, member 8	0.00394479	0.0354563	3.15316
ILMN_1660693	SYN1	synapsin I	0.000755015	0.0125575	3.15096
ILMN_1774020	ZDHHC11	zinc finger, DHHC-type containing 11	0.000694601	0.0119859	3.14878
ILMN_1770758	AKAP6	A kinase (PRKA) anchor protein 6	0.000987966	0.0147548	3.14526
ILMN_1806037	TK1	thymidine kinase 1, soluble	5.13361e-05	0.00306554	3.14467
ILMN_1750821	BRDT	bromodomain, testis-specific	0.00641939	0.0480775	3.14144
ILMN_1663749	BTNL3	butyrophilin-like 3	0.00391775	0.0353079	3.13881
ILMN_1685540	SHROOM3	shroom family member 3	0.00079283	0.0129209	3.12992
ILMN_2188390	FOXD4L2	forkhead box D4-like 2	0.00142547	0.0183404	3.12117
ILMN_1743465	TSPAN16	tetraspanin 16	0.00386575	0.0350411	3.1126
ILMN_1741960	DGKG	diacylglycerol kinase, gamma 90kDa	0.000521958	0.00999944	3.09382
ILMN_1694774	OR52J3	olfactory receptor, family 52, subfamily J, member 3	0.00126538	0.0171709	3.08933
ILMN_1732398	SCGB2A1	secretoglobin, family 2A, member 1	0.00599291	0.046094	3.0854
ILMN_2256687	SOX6	SRY (sex determining region Y)-box 6	0.00391555	0.0353016	3.0786
ILMN_1709269	CDH12	cadherin 12, type 2 (N-cadherin 2)	0.000257311	0.00677731	3.07306
ILMN_1675024	C1orf165	chromosome 1 open reading frame 175	0.00122902	0.0168914	3.06135
ILMN_2290686	SNX7	sorting nexin 7	0.000795541	0.0129295	3.06066
ILMN_1742054	RP1L1	retinitis pigmentosa 1-like 1	0.000795233	0.0129295	3.05928
ILMN_1797873	ANKK1	ankyrin repeat and kinase domain containing 1	0.000224087	0.00626804	3.05925
ILMN_2278413	VCX2	variable charge, X-linked 2	0.000481338	0.00952747	3.05069
ILMN_1752144	LOC284751	uncharacterized LOC284751	0.000289806	0.00730388	3.03172
ILMN_1812302	FAM82A1	family with sequence similarity 82, member A1	0.00597549	0.0460081	3.0282
ILMN_2069224	PVALB	parvalbumin	0.00143522	0.0183954	3.01942
ILMN_1655387	PRDM16	PR domain containing 16	0.00299192	0.0295735	3.01062
ILMN_1712506	DPP6	dipeptidyl-peptidase 6	0.00177806	0.0210363	3.00876
ILMN_1662734	OTOP3	otopetrin 3	5.03773e-05	0.00304158	3.00614
ILMN_1689734	IL1RN	interleukin 1 receptor antagonist	0.000452099	0.00919485	3.00603
ILMN_2295559	A3GALT2	alpha 1,3-galactosyltransferase 2	0.00166551	0.0201787	3.00073
ILMN_1652137	PPYR1	pancreatic polypeptide receptor 1	0.00118406	0.0165304	2.99833
ILMN_1773848	C15orf32	chromosome 15 open reading frame 32	0.00214108	0.0236901	2.99485
ILMN_1701340	LHX3	LIM homeobox 3	0.00334153	0.0316334	2.99356
ILMN_1723436	PFKFB2	6-phosphofructo-2-kinase/fructose-2,6-biphosphatase 2	0.00176492	0.0209717	2.99206
ILMN_1660400	BRUNOL4	CUGBP, Elav-like family member 4	0.00125157	0.0170743	2.95304
ILMN_1745006	CXorf41	chromosome X open reading frame 41	1.55299e-05	0.00171913	2.9504
ILMN_1668969	MIXL1	Mix1 homeobox-like 1 (Xenopus laevis)	0.00224841	0.0244625	2.94123
ILMN_1798311	MBTPS2	membrane-bound transcription factor peptidase, site 2	5.0277e-05	0.00304158	2.93806
ILMN_1775997	CHAT	choline O-acetyltransferase	7.35355e-05	0.00351258	2.93752
ILMN_1676408	TAGAP	T-cell activation RhoGTPase activating protein	0.00498166	0.0413255	2.93429
ILMN_2043173	TEKT2	tektin 2 (testicular)	0.00117396	0.0164232	2.93228
ILMN_1692429	PQBP1	polyglutamine binding protein 1	0.000115641	0.00437015	2.92421
ILMN_1694131	C4orf45	chromosome 4 open reading frame 45	0.000156825	0.005099	2.92404
ILMN_1690589	MLC1	megalencephalic leukoencephalopathy with subcortical cysts 1	0.0018327	0.0214942	2.91537
ILMN_1677734	WFDC9	WAP four-disulfide core domain 9	0.000108331	0.00425157	2.91477
ILMN_1711275	SLC5A5	solute carrier family 5 (sodium iodide symporter), member 5	0.000368116	0.00825904	2.91337
ILMN_1728067	OR2F1	olfactory receptor, family 2, subfamily F, member 1	0.00185827	0.0216964	2.9126
ILMN_1736223	IQCH	IQ motif containing H	0.0063066	0.0476354	2.90845
ILMN_2280189	AKAP11	A kinase (PRKA) anchor protein 11	0.00112324	0.0159856	2.90748
ILMN_1812222	ZNF2	zinc finger protein 2	0.000787307	0.0128756	2.90216
ILMN_1768271	SMAP1	small ArfGAP 1	0.00170589	0.0204567	2.89218
ILMN_2102721	DEFA1	defensin, alpha 1	9.89827e-05	0.00408946	2.8912
ILMN_2171649	CGB2	chorionic gonadotropin, beta polypeptide 2	0.00129189	0.0173742	2.88649
ILMN_1683781	ADAMTS15	ADAM metallopeptidase with thrombospondin type 1 motif, 15	9.28092e-07	0.000463414	2.88487
ILMN_1803744	SELS	selenoprotein S	0.00546787	0.0436909	2.8814
ILMN_1702821	TTLL7	tubulin tyrosine ligase-like family, member 7	0.00504384	0.0416498	2.87521
ILMN_1813430	TRIM69	tripartite motif-containing 69	0.00256125	0.0265609	2.87476
ILMN_1804005	FBP2	fructose-1,6-bisphosphatase 2	0.00464057	0.0394131	2.87203
ILMN_2195892	SPATA4	spermatogenesis associated 4	0.00472846	0.0399336	2.86832
ILMN_1659270	OTP	orthopedia homeobox	0.000133004	0.00467353	2.86789
ILMN_1669208	BZRPL1	translocator protein 2	0.00607573	0.0465205	2.86739
ILMN_1684704	LOC400891	chromosome 14 open reading frame 166B pseudogene	0.000128159	0.00462755	2.8627
ILMN_2062620	NMT2	N-myristoyltransferase 2	0.00101077	0.0149941	2.85207
ILMN_1789531	FLJ42102	uncharacterized LOC399923	0.0033874	0.0319902	2.85133
ILMN_1798212	LLGL1	lethal giant larvae homolog 1 (Drosophila)	0.000562553	0.0104748	2.849
ILMN_2083137	LOC284379	solute carrier family 7 (cationic amino acid transporter, y+ system), member 3 pseudogene	0.000210109	0.00604271	2.8452
ILMN_1684032	ZNF613	zinc finger protein 613	0.000417949	0.00885238	2.84242
ILMN_2353054	KLK5	kallikrein-related peptidase 5	0.000968796	0.0145732	2.84143
ILMN_2070530	OR5F1	olfactory receptor, family 5, subfamily F, member 1	0.000554402	0.0103814	2.83411
ILMN_1749114	OTC	ornithine carbamoyltransferase	0.00574666	0.0450127	2.83294
ILMN_2410449	PCDHA13	protocadherin alpha 13	0.00137021	0.0179643	2.8312
ILMN_1700759	RIMS1	regulating synaptic membrane exocytosis 1	0.0019735	0.0225153	2.82812
ILMN_1798914	C1orf65	chromosome 1 open reading frame 65	0.0040596	0.03606	2.81895
ILMN_1679958	TBX6	T-box 6	0.00454453	0.0388306	2.81884
ILMN_1761322	FHOD3	formin homology 2 domain containing 3	0.00429547	0.0375772	2.81836
ILMN_2163906	FUT10	fucosyltransferase 10 (alpha (1,3) fucosyltransferase)	0.0038703	0.0350688	2.81712
ILMN_1658806	SLC5A10	solute carrier family 5 (sodium/glucose cotransporter), member 10	8.59676e-05	0.00382675	2.81648
ILMN_1716136	KRT71	keratin 71	0.00171566	0.0205319	2.81267
ILMN_1813561	SCIN	scinderin	0.00107562	0.0155435	2.81194
ILMN_1663042	SDC4	syndecan 4	0.000171337	0.00538599	2.80709
ILMN_1697704	KRTAP12-2	keratin associated protein 12-2	0.00121081	0.0167466	2.80526
ILMN_1784753	PAIP2	poly(A) binding protein interacting protein 2	0.00031215	0.00755989	2.8041
ILMN_1793570	C11orf72	chromosome 11 open reading frame 72	0.00195033	0.022327	2.80384
ILMN_1673982	C11orf40	chromosome 11 open reading frame 40	1.18074e-05	0.00146611	2.79679
ILMN_1719449	DCLK2	doublecortin-like kinase 2	0.00385999	0.0350265	2.79546
ILMN_1685164	CACNB4	calcium channel, voltage-dependent, beta 4 subunit	0.00443824	0.0382958	2.79258
ILMN_1813735	CSNK1G3	casein kinase 1, gamma 3	0.000575987	0.0106351	2.79064
ILMN_1798753	SPINLW1	serine peptidase inhibitor-like, with Kunitz and WAP domains 1 (eppin)	0.00243395	0.0255685	2.78797
ILMN_1720623	SYTL3	synaptotagmin-like 3	0.000429698	0.00896238	2.78653
ILMN_1687090	GABRB3	gamma-aminobutyric acid (GABA) A receptor, beta 3	0.00563479	0.0444944	2.78226
ILMN_1797530	CHCHD5	coiled-coil-helix-coiled-coil-helix domain containing 5	0.00076351	0.012647	2.7741
ILMN_1711758	FOXR2	forkhead box R2	9.98288e-07	0.000469132	2.77285
ILMN_2361810	DRD3	dopamine receptor D3	0.000306664	0.0075123	2.77089
ILMN_1730709	BSG	basigin (Ok blood group)	0.000592939	0.0108036	2.76667
ILMN_2095597	CDH16	cadherin 16, KSP-cadherin	0.00513469	0.042148	2.76636
ILMN_2175455	CYP2A13	cytochrome P450, family 2, subfamily A, polypeptide 13	0.00193876	0.0222779	2.76576
ILMN_1813021	COL4A6	collagen, type IV, alpha 6	0.000619858	0.0111555	2.76497
ILMN_1760955	C1orf100	chromosome 1 open reading frame 100	0.000981037	0.0147018	2.76353
ILMN_2201386	ADAM18	ADAM metallopeptidase domain 18	0.00202066	0.0228315	2.76327
ILMN_1685663	CYP24A1	cytochrome P450, family 24, subfamily A, polypeptide 1	0.000330979	0.00783007	2.75902
ILMN_1677273	TH	tyrosine hydroxylase	0.00255592	0.0265174	2.7567
ILMN_1665260	FMO2	flavin containing monooxygenase 2 (non-functional)	0.00183563	0.021507	2.75392
ILMN_1656364	ASB12	ankyrin repeat and SOCS box-containing 12	0.00130159	0.0174448	2.75357
ILMN_1744308	DHX33	DEAH (Asp-Glu-Ala-His) box polypeptide 33	0.00072468	0.0122793	2.74933
ILMN_1655474	RNASE9	ribonuclease, RNase A family, 9 (non-active)	0.00547307	0.0437175	2.74698
ILMN_2396948	PSMC3IP	PSMC3 interacting protein	0.00391362	0.0353016	2.74649
ILMN_1673704	INA	internexin neuronal intermediate filament protein, alpha	0.000197591	0.00585443	2.74435
ILMN_1726952	FLOT1	flotillin 1	0.00263426	0.0270906	2.7408
ILMN_1697054	LRRN4CL	LRRN4 C-terminal like	0.00575135	0.0450209	2.74062
ILMN_1740706	PMP2	peripheral myelin protein 2	0.0039098	0.0352905	2.73882
ILMN_1683345	HFE	hemochromatosis	0.00567753	0.0446707	2.7342
ILMN_1812517	FGF8	fibroblast growth factor 8 (androgen-induced)	0.000295701	0.00735896	2.73397
ILMN_1705187	LPPR5	lipid phosphate phosphatase-related protein type 5	0.000489222	0.00960759	2.73115
ILMN_1766904	MAPK10	mitogen-activated protein kinase 10	0.00561758	0.0444333	2.72343
ILMN_1702217	NEUROD2	neurogenic differentiation 2	0.00157487	0.019547	2.72146
ILMN_1708152	BPIL2	bactericidal/permeability-increasing protein-like 2	0.00264055	0.0271078	2.71617
ILMN_1700024	UST	uronyl-2-sulfotransferase	0.00553553	0.0439856	2.71421
ILMN_1702657	ETV3L	ets variant 3-like	0.00518466	0.0423851	2.71308
ILMN_1765244	NEUROG3	neurogenin 3	6.66575e-05	0.00341554	2.71127
ILMN_1676973	CABP5	calcium binding protein 5	0.00322071	0.0309262	2.70164
ILMN_1677153	OPN1LW	opsin 1 (cone pigments), long-wave-sensitive	0.000891286	0.0138064	2.70013
ILMN_2198859	C7orf52	chromosome 7 open reading frame 52	0.00518995	0.0423851	2.69415
ILMN_2320349	BACE1	beta-site APP-cleaving enzyme 1	0.000460909	0.00926079	2.68594
ILMN_2370910	RAD51L3	RAD51-like 3 (S. cerevisiae)	0.0032599	0.031099	2.68387
ILMN_1789058	TSEN15	tRNA splicing endonuclease 15 homolog (S. cerevisiae)	0.00347208	0.0325315	2.68107
ILMN_2378654	B3GALT5	UDP-Gal:betaGlcNAc beta 1,3-galactosyltransferase, polypeptide 5	0.00151389	0.0190498	2.6786
ILMN_1773914	POU6F2	POU class 6 homeobox 2	0.00110539	0.0158276	2.67742
ILMN_1805385	IL22RA2	interleukin 22 receptor, alpha 2	0.00565239	0.0445883	2.67704
ILMN_1652852	GAS2	growth arrest-specific 2	0.00187778	0.0218373	2.67497
ILMN_1719241	OR8B3	olfactory receptor, family 8, subfamily B, member 3	0.00209322	0.0233478	2.67378
ILMN_1680886	OR5H15	olfactory receptor, family 5, subfamily H, member 15	0.00238204	0.0252606	2.66723
ILMN_1690595	ASMT	acetylserotonin O-methyltransferase	0.00645463	0.0482122	2.66613
ILMN_2155708	TLR3	toll-like receptor 3	0.000929446	0.0141822	2.6656
ILMN_1740676	SLC22A25	solute carrier family 22, member 25	0.00194371	0.0222779	2.66445
ILMN_1741265	CRYBA2	crystallin, beta A2	0.00134642	0.0177615	2.66267
ILMN_1784626	CA7	carbonic anhydrase VII	0.00176787	0.0209856	2.65918
ILMN_2256050	SERPINA1	serpin peptidase inhibitor, clade A (alpha-1 antiproteinase, antitrypsin), member 1	0.00376945	0.0344468	2.65879
ILMN_1710903	MAPT	microtubule-associated protein tau	0.00591205	0.0456891	2.65667
ILMN_2253145	NEK3	NIMA (never in mitosis gene a)-related kinase 3	0.000464002	0.00931497	2.65523
ILMN_1772073	OR2F2	olfactory receptor, family 2, subfamily F, member 2	0.000144548	0.00487392	2.65522
ILMN_2263333	RXRG	retinoid X receptor, gamma	0.000711263	0.0121484	2.65421
ILMN_1684558	C1QTNF9	C1q and tumor necrosis factor related protein 9	0.00039736	0.00857101	2.65229
ILMN_1783383	DCDC1	doublecortin domain containing 1	0.00130487	0.0174588	2.64886
ILMN_2382431	ANKRD36	ankyrin repeat domain 36	0.00381767	0.0347376	2.64304
ILMN_2170157	VCY	variable charge, Y-linked	0.000112045	0.00433192	2.63518
ILMN_2167961	LOC100287792	uncharacterized LOC100287792	0.00517252	0.0423446	2.63365
ILMN_1678816	GREM2	gremlin 2	0.00539004	0.0433494	2.62969
ILMN_2166716	VCX3A	variable charge, X-linked 3A	2.06679e-05	0.00198567	2.6252
ILMN_1796471	GDF5	growth differentiation factor 5	0.0015311	0.0191535	2.62314
ILMN_2200738	OR4F5	olfactory receptor, family 4, subfamily F, member 5	0.000872485	0.0136252	2.62063
ILMN_1683932	ZNF425	zinc finger protein 425	0.000435039	0.00901104	2.61665
ILMN_1735278	OR13C3	olfactory receptor, family 13, subfamily C, member 3	0.00301528	0.0296802	2.61357
ILMN_1653821	ADRA1A	adrenergic, alpha-1A-, receptor	0.000604507	0.0109803	2.61357
ILMN_1755674	FAM12A	epididymal protein 3A	0.00254409	0.0264278	2.61219
ILMN_2203544	OR2A9P	olfactory receptor, family 2, subfamily A, member 9 pseudogene	0.00101765	0.0150108	2.61143
ILMN_2125763	ZMYND10	zinc finger, MYND-type containing 10	0.00324613	0.0310685	2.60606
ILMN_2247226	BAIAP2	BAI1-associated protein 2	0.000177028	0.00546645	2.5988
ILMN_2369756	CCDC46	coiled-coil domain containing 46	6.43401e-05	0.00340843	2.59655
ILMN_1814015	CDH17	cadherin 17, LI cadherin (liver-intestine)	0.000338402	0.00792143	2.59562
ILMN_2279484	C2orf88	chromosome 2 open reading frame 88	0.00309053	0.0300823	2.59524
ILMN_1727144	BIRC8	baculoviral IAP repeat-containing 8	0.00175235	0.0208643	2.59419
ILMN_2045270	PRAMEF6	PRAME family member 6	0.00138425	0.0180568	2.58826
ILMN_2193214	MPND	MPN domain containing	0.0050789	0.0418378	2.5859
ILMN_1657486	OR2AG2	olfactory receptor, family 2, subfamily AG, member 2	0.00454597	0.0388306	2.58514
ILMN_1754002	IL1F8	interleukin 1 family, member 8 (eta)	0.0023729	0.0252436	2.58493
ILMN_1767244	OR13A1	olfactory receptor, family 13, subfamily A, member 1	0.0053694	0.0432724	2.58094
ILMN_1806754	GLDC	glycine dehydrogenase (decarboxylating)	0.00541213	0.0434436	2.57653
ILMN_1778319	DMKN	dermokine	0.000540396	0.0102688	2.56836
ILMN_1651708	RESP18	regulated endocrine-specific protein 18 homolog (rat)	0.000674421	0.0117851	2.56095
ILMN_1685608	NPTX2	neuronal pentraxin II	0.00241571	0.0254899	2.56008
ILMN_1705324	RBFOX3	RNA binding protein, fox-1 homolog (C. elegans) 3	0.000143752	0.00486107	2.55764
ILMN_1658713	TNFSF11	tumor necrosis factor (ligand) superfamily, member 11	0.00234524	0.0250629	2.55753
ILMN_1803871	RHO	rhodopsin	0.000773739	0.0127694	2.55672
ILMN_1711353	OR7A5	olfactory receptor, family 7, subfamily A, member 5	0.00147939	0.0188073	2.55303
ILMN_1707002	TMLHE	trimethyllysine hydroxylase, epsilon	0.00417698	0.0368655	2.5524
ILMN_1696867	TPD52L3	tumor protein D52-like 3	0.00157688	0.0195489	2.55027
ILMN_2156965	SH2D4B	SH2 domain containing 4B	5.74504e-05	0.00325663	2.5479
ILMN_1784316	PCDHA9	protocadherin alpha 9	0.00137756	0.0180167	2.54256
ILMN_1748903	LIN28	lin-28 homolog A (C. elegans)	0.00426163	0.0374156	2.54107
ILMN_1701468	HGFAC	HGF activator	0.001941	0.0222779	2.5403
ILMN_1740776	OR5B12	olfactory receptor, family 5, subfamily B, member 12	6.4568e-05	0.00341279	2.53682
ILMN_1732491	OFCC1	orofacial cleft 1 candidate 1	0.00228709	0.024666	2.53323
ILMN_1687410	OSBPL11	oxysterol binding protein-like 11	0.00440016	0.0381044	2.52237
ILMN_1652366	NLRP7	NLR family, pyrin domain containing 7	0.000190291	0.0057253	2.52109
ILMN_1759186	LOC84856	uncharacterized LOC84856	0.0032114	0.0308621	2.5184
ILMN_1716553	KIF23	kinesin family member 23	0.0036495	0.033701	2.51788
ILMN_1722670	LYNX1	Ly6/neurotoxin 1	0.00640106	0.0480317	2.51754
ILMN_1691662	LOC100101266	hepatitis A virus cellular receptor 1 pseudogene	0.00302173	0.029702	2.51719
ILMN_1678189	C9orf153	chromosome 9 open reading frame 153	0.00249219	0.0260403	2.51011
ILMN_1723227	FGF3	fibroblast growth factor 3	0.0063859	0.0480047	2.4993
ILMN_1734608	ZNF77	zinc finger protein 77	0.00271345	0.0276386	2.49604
ILMN_1765000	ZSCAN20	zinc finger and SCAN domain containing 20	6.55072e-06	0.00117353	2.49477
ILMN_2183261	THAP4	THAP domain containing 4	0.00602379	0.0462435	2.48885
ILMN_1799863	AOC2	amine oxidase, copper containing 2 (retina-specific)	0.000754901	0.0125575	2.48514
ILMN_2306955	ACPL2	acid phosphatase-like 2	0.000906456	0.013931	2.48476
ILMN_1787948	KCNIP4	Kv channel interacting protein 4	0.0022237	0.0243064	2.48036
ILMN_1747783	CYS1	cystin 1	0.00178339	0.0210632	2.47914
ILMN_2407564	GPR98	G protein-coupled receptor 98	0.00120201	0.0166878	2.47805
ILMN_1709719	EDG7	lysophosphatidic acid receptor 3	0.000200293	0.00588083	2.47799
ILMN_1788410	PAMR1	peptidase domain containing associated with muscle regeneration 1	0.000314515	0.0075921	2.47643
ILMN_1699243	MSMB	microseminoprotein, beta-	2.59361e-06	0.000672363	2.47367
ILMN_2345749	FGF8	fibroblast growth factor 8 (androgen-induced)	0.000227482	0.00631782	2.4712
ILMN_1760287	OR4K13	olfactory receptor, family 4, subfamily K, member 13	0.00231943	0.0248777	2.46618
ILMN_1774250	PLUNC	palate, lung and nasal epithelium associated	0.000577269	0.0106421	2.46529
ILMN_1656904	SLC1A4	solute carrier family 1 (glutamate/neutral amino acid transporter), member 4	0.00189831	0.0219889	2.46437
ILMN_2283726	SPATA7	spermatogenesis associated 7	0.00365803	0.0337425	2.4608
ILMN_2074432	OR2A1	olfactory receptor, family 2, subfamily A, member 1	0.000545967	0.0102996	2.45594
ILMN_2291092	FAM13A1	family with sequence similarity 13, member A	0.000208377	0.00601839	2.45236
ILMN_1710762	MAPK8IP2	mitogen-activated protein kinase 8 interacting protein 2	0.0058998	0.0456891	2.45065
ILMN_2231569	ATAD3C	ATPase family, AAA domain containing 3C	0.00035649	0.00812244	2.44937
ILMN_2327812	IL5RA	interleukin 5 receptor, alpha	0.000260226	0.00682344	2.44918
ILMN_2411864	PHACTR3	phosphatase and actin regulator 3	0.00170464	0.0204522	2.44058
ILMN_1681777	SHROOM2	shroom family member 2	0.00157839	0.0195574	2.43997
ILMN_1781859	UGT2B28	UDP glucuronosyltransferase 2 family, polypeptide B28	0.000923051	0.0141214	2.43875
ILMN_1814397	EPB42	erythrocyte membrane protein band 4.2	0.00416732	0.0368004	2.43741
ILMN_1723381	TSSK4	testis-specific serine kinase 4	0.00557323	0.0441867	2.43104
ILMN_2202239	ZNF474	zinc finger protein 474	0.00138496	0.0180568	2.42429
ILMN_1715612	OTOP2	otopetrin 2	0.00378395	0.0345264	2.42073
ILMN_2162819	UGT2B11	UDP glucuronosyltransferase 2 family, polypeptide B11	0.000447529	0.00915645	2.4197
ILMN_1808713	HSD17B2	hydroxysteroid (17-beta) dehydrogenase 2	0.00642044	0.0480775	2.41825
ILMN_1750850	KLK14	kallikrein-related peptidase 14	0.00640243	0.0480317	2.4182
ILMN_2304289	GRIP1	glutamate receptor interacting protein 1	0.00263617	0.0270984	2.41714
ILMN_1752009	NANOS1	nanos homolog 1 (Drosophila)	0.00151502	0.0190539	2.41506
ILMN_1772214	CRYBA1	crystallin, beta A1	0.00101534	0.0150062	2.41227
ILMN_1805177	KIAA1772	growth regulation by estrogen in breast cancer-like	0.00579058	0.0451578	2.41197
ILMN_1686380	SYPL1	synaptophysin-like 1	0.000422367	0.00888979	2.40677
ILMN_1742677	HOXB13	homeobox B13	0.000750658	0.0125518	2.40019
ILMN_1666148	OR8A1	olfactory receptor, family 8, subfamily A, member 1	1.13808e-05	0.0014437	2.39394
ILMN_2073115	OR4K15	olfactory receptor, family 4, subfamily K, member 15	0.00127493	0.0172409	2.39205
ILMN_1655664	DGKD	diacylglycerol kinase, delta 130kDa	0.000600318	0.0109192	2.38998
ILMN_1779406	OR2Z1	olfactory receptor, family 2, subfamily Z, member 1	0.000430392	0.00896238	2.3877
ILMN_2224765	TMEM75	transmembrane protein 75	0.00337472	0.0318832	2.38719
ILMN_1753912	ABHD11	abhydrolase domain containing 11	0.00429328	0.0375772	2.3865
ILMN_1660729	ATP6V1C2	ATPase, H+ transporting, lysosomal 42kDa, V1 subunit C2	0.00349488	0.0326836	2.38183
ILMN_1696587	LRP1B	low density lipoprotein receptor-related protein 1B	0.00226712	0.0245637	2.37739
ILMN_1715984	GREB1	growth regulation by estrogen in breast cancer 1	2.88902e-06	0.000713679	2.3758
ILMN_1720235	ADSSL1	adenylosuccinate synthase like 1	0.00293178	0.0292527	2.37418
ILMN_2329569	C9orf116	chromosome 9 open reading frame 116	0.00397658	0.0356164	2.37329
ILMN_1707881	NMNAT2	nicotinamide nucleotide adenylyltransferase 2	0.000271856	0.00702633	2.36468
ILMN_1797201	KRTAP10-2	keratin associated protein 10-2	2.13113e-05	0.00203006	2.3646
ILMN_1706186	C12orf53	chromosome 12 open reading frame 53	0.00196276	0.0224364	2.35892
ILMN_1705865	XIRP2	xin actin-binding repeat containing 2	0.00647319	0.0482723	2.35202
ILMN_1799030	CMTM2	CKLF-like MARVEL transmembrane domain containing 2	0.00374123	0.0342565	2.34992
ILMN_1805395	LTBP3	latent transforming growth factor beta binding protein 3	0.00210288	0.0234332	2.34822
ILMN_1674662	C15orf42	chromosome 15 open reading frame 42	0.00561366	0.0444322	2.33672
ILMN_1794595	GAMT	guanidinoacetate N-methyltransferase	0.00160039	0.0196809	2.33662
ILMN_1794672	C9orf47	chromosome 9 open reading frame 47	2.886e-05	0.0023037	2.33577
ILMN_2241627	MAGEC1	melanoma antigen family C, 1	0.00115782	0.0163194	2.33483
ILMN_1739275	HTR3C	5-hydroxytryptamine (serotonin) receptor 3, family member C	0.0019549	0.0223575	2.33455
ILMN_1730945	C19orf4	chromosome 19 open reading frame 43	0.00345204	0.0324099	2.33077
ILMN_2226691	C7orf61	chromosome 7 open reading frame 61	0.00644746	0.0482122	2.33017
ILMN_1746164	SCD5	stearoyl-CoA desaturase 5	0.000296059	0.00736007	2.32942
ILMN_2109994	RAB4B	RAB4B, member RAS oncogene family	0.00397778	0.0356164	2.32897
ILMN_1735479	LPAL2	lipoprotein, Lp(a)-like 2 pseudogene	0.00591151	0.0456891	2.32549
ILMN_1677178	DEFB121	defensin, beta 121	0.00254503	0.0264278	2.32364
ILMN_1725518	ANGPTL6	angiopoietin-like 6	0.00248986	0.0260364	2.32263
ILMN_1702739	CATSPERD	catsper channel auxiliary subunit delta	0.00066641	0.0117148	2.31728
ILMN_1713422	ST18	suppression of tumorigenicity 18 (breast carcinoma) (zinc finger protein)	0.00273494	0.0278092	2.31696
ILMN_2357701	FOXP2	forkhead box P2	0.000962298	0.014523	2.31554
ILMN_2395827	RASGRP4	RAS guanyl releasing protein 4	0.000706796	0.0121251	2.31473
ILMN_2216438	GRK1	G protein-coupled receptor kinase 1	0.000407474	0.00872124	2.31109
ILMN_2414878	STXBP1	syntaxin binding protein 1	0.001133	0.0160839	2.31011
ILMN_1664165	IZUMO1	izumo sperm-egg fusion 1	0.00210564	0.0234417	2.30794
ILMN_2236655	HM13	histocompatibility (minor) 13	0.00370155	0.0339992	2.30412
ILMN_1687546	HSP90AA1	heat shock protein 90kDa alpha (cytosolic), class A member 1	0.00073164	0.0123526	2.29983
ILMN_2095571	ARGFXP2	arginine-fifty homeobox pseudogene 2	0.000195119	0.00581838	2.29865
ILMN_1768511	KCNG4	potassium voltage-gated channel, subfamily G, member 4	0.00632697	0.0477279	2.297
ILMN_1715653	C9orf71	chromosome 9 open reading frame 71	0.0022775	0.0246193	2.29559
ILMN_1765613	OR52L1	olfactory receptor, family 52, subfamily L, member 1	0.00434868	0.0378682	2.2935
ILMN_1711092	KCNB1	potassium voltage-gated channel, Shab-related subfamily, member 1	0.00592896	0.0457611	2.29266
ILMN_1710735	ZNF451	zinc finger protein 451	0.00625932	0.0474309	2.2911
ILMN_1673537	WFDC3	WAP four-disulfide core domain 3	0.00110395	0.0158165	2.28866
ILMN_1702310	LGR5	leucine-rich repeat-containing G protein-coupled receptor 5	0.0049502	0.041108	2.28649
ILMN_1705252	KLK8	kallikrein-related peptidase 8	0.00292343	0.0292194	2.28532
ILMN_2219038	OR8J3	olfactory receptor, family 8, subfamily J, member 3	0.00161967	0.0198394	2.28392
ILMN_1801666	SCN10A	sodium channel, voltage-gated, type X, alpha subunit	0.00370523	0.0340197	2.28378
ILMN_1730745	CCDC73	coiled-coil domain containing 73	0.000441171	0.00910118	2.28127
ILMN_1812395	LARP1	La ribonucleoprotein domain family, member 1	0.00044738	0.00915645	2.2793
ILMN_1709472	FAM71A	family with sequence similarity 71, member A	0.0017674	0.0209856	2.27852
ILMN_1729842	C11orf42	chromosome 11 open reading frame 42	0.00164608	0.0200595	2.27658
ILMN_1674756	FBXW12	F-box and WD repeat domain containing 12	0.00232302	0.024882	2.2716
ILMN_2094875	ABCB1	ATP-binding cassette, sub-family B (MDR/TAP), member 1	0.00225813	0.0245115	2.27015
ILMN_1664111	RFFL	ring finger and FYVE-like domain containing 1	0.0057147	0.0448687	2.26879
ILMN_1772458	SPAG6	sperm associated antigen 6	0.00540609	0.0434189	2.26646
ILMN_1670158	FAM83A	family with sequence similarity 83, member A	0.00507425	0.0418273	2.26527
ILMN_2413377	RSPH10B	radial spoke head 10 homolog B (Chlamydomonas)	0.00141052	0.0182481	2.26185
ILMN_2379560	CDC14B	CDC14 cell division cycle 14 homolog B (S. cerevisiae)	0.00075177	0.0125518	2.25926
ILMN_2226763	H2AFB2	H2A histone family, member B2	6.11924e-05	0.00334045	2.257
ILMN_2209088	KRTAP9-4	keratin associated protein 9-4	0.00264226	0.0271135	2.24968
ILMN_1754241	C16orf73	chromosome 16 open reading frame 73	0.00357922	0.0332531	2.23593
ILMN_1769453	PIH1D2	PIH1 domain containing 2	7.91958e-05	0.00364106	2.23458
ILMN_1779304	CRYGA	crystallin, gamma A	0.00186948	0.0217669	2.23226
ILMN_1684143	NPTXR	neuronal pentraxin receptor	0.000959877	0.0144957	2.23193
ILMN_2413015	EMX1	empty spiracles homeobox 1	0.00398514	0.0356687	2.23019
ILMN_1673491	LRAT	lecithin retinol acyltransferase (phosphatidylcholine--retinol O-acyltransferase)	0.00275825	0.0279769	2.22995
ILMN_2220978	NR0B2	nuclear receptor subfamily 0, group B, member 2	0.00463403	0.0393901	2.22909
ILMN_1712660	PDZD7	PDZ domain containing 7	0.00432341	0.0377042	2.22731
ILMN_1813949	CASQ1	calsequestrin 1 (fast-twitch, skeletal muscle)	0.00355215	0.0330664	2.22581
ILMN_2134723	OR7E91P	olfactory receptor, family 7, subfamily E, member 91 pseudogene	0.00332758	0.0315615	2.22484
ILMN_1719105	KRTAP20-1	keratin associated protein 20-1	0.00640981	0.0480439	2.22366
ILMN_1747744	LHFPL2	lipoma HMGIC fusion partner-like 2	0.000290375	0.00730388	2.2221
ILMN_1748366	SLC5A9	solute carrier family 5 (sodium/glucose cotransporter), member 9	0.000139444	0.00479133	2.22075
ILMN_1773940	GPR161	G protein-coupled receptor 161	0.00220267	0.0241593	2.21388
ILMN_2227817	GSTA3	glutathione S-transferase alpha 3	0.000106658	0.00421387	2.21108
ILMN_1684699	ELF5	E74-like factor 5 (ets domain transcription factor)	0.00538279	0.0433207	2.2109
ILMN_2393693	LRRC37A4	leucine rich repeat containing 37, member A4 (pseudogene)	0.00294087	0.0292814	2.2092
ILMN_2060268	KCNQ5	potassium voltage-gated channel, KQT-like subfamily, member 5	0.00241168	0.0254714	2.20684
ILMN_1721727	USP6	ubiquitin specific peptidase 6 (Tre-2 oncogene)	0.00198462	0.0225983	2.20322
ILMN_1729203	PDILT	protein disulfide isomerase-like, testis expressed	0.0039376	0.0354052	2.20082
ILMN_1773623	HSD17B1	hydroxysteroid (17-beta) dehydrogenase 1	0.0067562	0.049907	2.20066
ILMN_2153061	FGF20	fibroblast growth factor 20	0.00449448	0.0385514	2.20027
ILMN_1748981	KLK3	kallikrein-related peptidase 3	0.00401762	0.0357997	2.19698
ILMN_1747754	SHANK1	SH3 and multiple ankyrin repeat domains 1	0.00205983	0.023074	2.19549
ILMN_2399588	THSD1	thrombospondin, type I, domain containing 1	0.00239795	0.0253834	2.19467
ILMN_1786852	ZCCHC3	zinc finger, CCHC domain containing 3	0.00147626	0.0187985	2.19068
ILMN_2215965	CYP2B6	cytochrome P450, family 2, subfamily B, polypeptide 6	4.93176e-06	0.000989218	2.18864
ILMN_2401436	PKMYT1	protein kinase, membrane associated tyrosine/threonine 1	0.00227595	0.0246138	2.18864
ILMN_1792748	CPS1	carbamoyl-phosphate synthase 1, mitochondrial	0.000109592	0.00427228	2.18694
ILMN_1727917	C6orf188	family with sequence similarity 26, member E	0.00539636	0.0433853	2.18389
ILMN_1802699	PCK2	phosphoenolpyruvate carboxykinase 2 (mitochondrial)	0.0015355	0.0191722	2.17943
ILMN_1787292	CDC20B	cell division cycle 20 homolog B (S. cerevisiae)	3.50291e-05	0.00258429	2.17874
ILMN_1813517	DISP2	dispatched homolog 2 (Drosophila)	0.000344926	0.00797509	2.17741
ILMN_2209260	KRTAP1-3	keratin associated protein 1-3	0.000867177	0.0136126	2.17548
ILMN_1794072	B3GAT1	beta-1,3-glucuronyltransferase 1 (glucuronosyltransferase P)	0.00182254	0.0214071	2.17416
ILMN_1739138	OR1N1	olfactory receptor, family 1, subfamily N, member 1	0.00477708	0.0401823	2.17289
ILMN_1811719	MYO7A	myosin VIIA	0.00135263	0.0178334	2.17246
ILMN_1677768	POR	P450 (cytochrome) oxidoreductase	0.00152811	0.0191263	2.17018
ILMN_2043918	DLEU1	deleted in lymphocytic leukemia 1 (non-protein coding)	0.000947755	0.0143868	2.16464
ILMN_1666380	STARD13	StAR-related lipid transfer (START) domain containing 13	0.00302487	0.029702	2.16452
ILMN_1694634	MOGAT3	monoacylglycerol O-acyltransferase 3	0.0044098	0.0381457	2.16128
ILMN_2373137	C9orf172	chromosome 9 open reading frame 172	0.00239965	0.02539	2.16089
ILMN_1755047	LRRC2	leucine rich repeat containing 2	0.00159522	0.0196773	2.15884
ILMN_1679580	KCNIP4	Kv channel interacting protein 4	0.000803692	0.0129718	2.15867
ILMN_1705111	FNDC3A	fibronectin type III domain containing 3A	0.00304218	0.0297971	2.15783
ILMN_1690209	RNF207	ring finger protein 207	0.00197571	0.0225296	2.1576
ILMN_1655272	SLC23A2	solute carrier family 23 (nucleobase transporters), member 2	0.000779222	0.0128238	2.15404
ILMN_1724355	MFRP	membrane frizzled-related protein	0.00122763	0.0168914	2.15321
ILMN_2387496	C1orf152	chromosome 1 open reading frame 162	0.00369573	0.0339724	2.1506
ILMN_1775257	PROK2	prokineticin 2	0.000696433	0.0119961	2.1503
ILMN_2373592	PCDHAC2	protocadherin alpha subfamily C, 2	0.00199828	0.0226877	2.14314
ILMN_1701562	PKHD1	polycystic kidney and hepatic disease 1 (autosomal recessive)	4.79393e-05	0.00296063	2.14288
ILMN_2376520	PPP2R3A	protein phosphatase 2, regulatory subunit B'', alpha	0.00127537	0.0172409	2.14137
ILMN_1796968	INTS5	integrator complex subunit 5	0.000399268	0.00858847	2.14125
ILMN_1788107	IL11	interleukin 11	1.32639e-05	0.00158054	2.14077
ILMN_1667839	UBR7	ubiquitin protein ligase E3 component n-recognin 7 (putative)	0.00293515	0.0292527	2.13589
ILMN_1694166	HIST1H2AA	histone cluster 1, H2aa	0.00390316	0.0352441	2.13328
ILMN_1708900	TMEM161A	transmembrane protein 161A	0.000515149	0.00992571	2.13238
ILMN_1689120	FRG2B	FSHD region gene 2 family, member B	0.00409791	0.0363179	2.12949
ILMN_2085933	OR1J1	olfactory receptor, family 1, subfamily J, member 1	0.00068081	0.0118614	2.1279
ILMN_1705522	SPAG1	sperm associated antigen 1	0.00325332	0.0310741	2.12688
ILMN_1742787	BHLHB4	basic helix-loop-helix family, member e23	0.000213692	0.00610735	2.12673
ILMN_1716061	OR5H14	olfactory receptor, family 5, subfamily H, member 14	0.00125435	0.0170743	2.12603
ILMN_1709173	HMHB1	histocompatibility (minor) HB-1	0.00237655	0.0252595	2.12331
ILMN_2082865	PLLP	plasmolipin	0.0053667	0.0432654	2.12291
ILMN_1785345	GPR84	G protein-coupled receptor 84	0.000247243	0.00660102	2.11443
ILMN_2284941	ABCF2	ATP-binding cassette, sub-family F (GCN20), member 2	0.00673701	0.0497809	2.11188
ILMN_1788098	LHCGR	luteinizing hormone/choriogonadotropin receptor	0.00657281	0.048829	2.10991
ILMN_1757896	ARSH	arylsulfatase family, member H	0.00226972	0.0245805	2.10699
ILMN_1671486	HOMER2	homer homolog 2 (Drosophila)	0.000878422	0.0136794	2.10548
ILMN_1756043	WDHD1	WD repeat and HMG-box DNA binding protein 1	0.0023055	0.0247714	2.10481
ILMN_1666731	C3orf32	chromosome 3 open reading frame 32	0.000843476	0.0133477	2.10209
ILMN_1793378	KCTD16	potassium channel tetramerisation domain containing 16	0.00455475	0.0388622	2.10208
ILMN_1771467	TMIGD1	transmembrane and immunoglobulin domain containing 1	0.00537125	0.0432724	2.10168
ILMN_1700887	TDRD5	tudor domain containing 5	0.000180882	0.00553446	2.09652
ILMN_1742764	UPP1	uridine phosphorylase 1	0.00396642	0.0355442	2.09444
ILMN_1763231	TTBK1	tau tubulin kinase 1	0.00612418	0.0467846	2.09232
ILMN_2211728	GUCA1B	guanylate cyclase activator 1B (retina)	0.00362682	0.0335675	2.09232
ILMN_1800573	RPS21	ribosomal protein S21	0.00566851	0.0446255	2.09207
ILMN_1721888	ITGA2B	integrin, alpha 2b (platelet glycoprotein IIb of IIb/IIIa complex, antigen CD41)	0.00379308	0.0345693	2.09196
ILMN_1725300	MLL3	myeloid/lymphoid or mixed-lineage leukemia 3	0.00269049	0.0274331	2.09034
ILMN_1664289	LOC440570	uncharacterized LOC440570	0.000759485	0.0126051	2.0864
ILMN_1783247	C10orf11	chromosome 10 open reading frame 11	0.00308687	0.0300823	2.08597
ILMN_1665740	LOC149950	uncharacterized LOC149950	0.000749594	0.0125518	2.08342
ILMN_1809604	MFAP3L	microfibrillar-associated protein 3-like	0.00265444	0.0271909	2.08024
ILMN_1709825	WDR89	WD repeat domain 89	0.00532085	0.0429789	2.08022
ILMN_1760087	SLC26A3	solute carrier family 26, member 3	0.0046836	0.0396947	2.07901
ILMN_1777917	DSCR10	Down syndrome critical region gene 10	0.000488525	0.00960743	2.07811
ILMN_1740508	KCNMA1	potassium large conductance calcium-activated channel, subfamily M, alpha member 1	0.00656978	0.0488263	2.07373
ILMN_1735693	PIWIL3	piwi-like 3 (Drosophila)	0.00299414	0.0295735	2.07029
ILMN_1810978	MUCL1	mucin-like 1	0.00229792	0.0247375	2.0683
ILMN_1736792	PLEC1	plectin	0.00590107	0.0456891	2.06462
ILMN_1711331	MAP1LC3C	microtubule-associated protein 1 light chain 3 gamma	0.000785011	0.012856	2.06239
ILMN_1724671	MAP6	microtubule-associated protein 6	0.00256706	0.0265977	2.06163
ILMN_1750633	HYDIN	hydrocephalus inducing homolog (mouse)	0.00367997	0.0338939	2.06008
ILMN_1779861	FAM47A	family with sequence similarity 47, member A	0.000972433	0.0146008	2.05735
ILMN_1705546	POU5F1	POU class 5 homeobox 1	0.00323669	0.0310542	2.05595
ILMN_1760708	CRYBB2	crystallin, beta B2	0.000466682	0.00935724	2.05138
ILMN_1736013	CIB3	calcium and integrin binding family member 3	0.00198607	0.0226039	2.05042
ILMN_1668000	KBTBD4	kelch repeat and BTB (POZ) domain containing 4	0.00545914	0.0436508	2.04932
ILMN_1657058	PPIL6	peptidylprolyl isomerase (cyclophilin)-like 6	0.0029477	0.0292873	2.0483
ILMN_1696537	DDIT4L	DNA-damage-inducible transcript 4-like	0.00194364	0.0222779	2.0464
ILMN_1753515	SRR	serine racemase	0.00450443	0.0385943	2.04386
ILMN_1802094	ZNF280A	zinc finger protein 280A	0.000224004	0.00626804	2.04323
ILMN_1784478	NPHP1	nephronophthisis 1 (juvenile)	0.00626871	0.0474768	2.03834
ILMN_1696684	FAM90A1	family with sequence similarity 90, member A1	0.00549698	0.0437744	2.0369
ILMN_2361991	TRIM15	tripartite motif-containing 15	0.00166944	0.0201951	2.03271
ILMN_1741847	MMP10	matrix metallopeptidase 10 (stromelysin 2)	0.00137873	0.0180167	2.03264
ILMN_1667115	TMEM61	transmembrane protein 61	0.00454689	0.0388306	2.03137
ILMN_1808258	HTR4	5-hydroxytryptamine (serotonin) receptor 4	0.000691293	0.0119474	2.0297
ILMN_2066088	C1orf64	chromosome 1 open reading frame 64	0.00309915	0.0301412	2.02907
ILMN_1687319	SLCO1B3	solute carrier organic anion transporter family, member 1B3	0.00217416	0.0239209	2.02153
ILMN_1740875	FPR2	formyl peptide receptor 2	0.00183792	0.0215203	2.01994
ILMN_1722489	TFF1	trefoil factor 1	0.00104984	0.015284	2.01865
ILMN_2126055	ASB5	ankyrin repeat and SOCS box-containing 5	0.000512408	0.00989728	2.01758
ILMN_1712475	HS3ST2	heparan sulfate (glucosamine) 3-O-sulfotransferase 2	0.00126964	0.0172131	2.01581
ILMN_1787658	MTMR7	myotubularin related protein 7	0.000695987	0.0119961	2.01404
ILMN_1662390	ASPHD1	aspartate beta-hydroxylase domain containing 1	0.00101448	0.0150062	2.014
ILMN_2391264	DMKN	dermokine	0.000874948	0.0136434	2.01175
ILMN_1705458	TRIM58	tripartite motif-containing 58	0.00658931	0.048936	2.01119
ILMN_2260392	ACTR3B	ARP3 actin-related protein 3 homolog B (yeast)	0.0030761	0.0300637	2.01084
ILMN_1814327	AGTR1	angiotensin II receptor, type 1	0.00368846	0.0339327	2.0093
ILMN_1777541	KLK6	kallikrein-related peptidase 6	0.00568235	0.0446745	2.00443
ILMN_1660978	OR11G2	olfactory receptor, family 11, subfamily G, member 2	0.000996485	0.0148211	2.00208
ILMN_1654855	DCX	doublecortin	0.00301189	0.0296802	2.00002
ILMN_1710684	MIPOL1	mirror-image polydactyly 1	0.00138245	0.0180542	1.99789
ILMN_1797413	SNX7	sorting nexin 7	9.93263e-05	0.00408946	1.99715
ILMN_1704702	MCM7	minichromosome maintenance complex component 7	0.0038038	0.0346267	1.99707
ILMN_1715390	GPR111	G protein-coupled receptor 111	0.00183419	0.0215009	1.996
ILMN_2333449	FSHR	follicle stimulating hormone receptor	0.00597518	0.0460081	1.99508
ILMN_2388403	EFCAB6	EF-hand calcium binding domain 6	0.00175321	0.0208643	1.99489
ILMN_2308903	WFDC3	WAP four-disulfide core domain 3	0.00288384	0.028879	1.99487
ILMN_1753131	SPATA16	spermatogenesis associated 16	0.000294539	0.00734152	1.99051
ILMN_1735156	SLC4A11	solute carrier family 4, sodium borate transporter, member 11	0.00384609	0.0349304	1.98776
ILMN_1720984	SPINK7	serine peptidase inhibitor, Kazal type 7 (putative)	0.00459494	0.0391326	1.98701
ILMN_1696132	ATP1A4	ATPase, Na+/K+ transporting, alpha 4 polypeptide	0.000623485	0.0112006	1.98579
ILMN_1783244	TNFRSF19	tumor necrosis factor receptor superfamily, member 19	0.00164345	0.020046	1.98413
ILMN_2061768	HES7	hairy and enhancer of split 7 (Drosophila)	0.00387816	0.0351129	1.98243
ILMN_1801914	SH3BP2	SH3-domain binding protein 2	0.00112061	0.0159772	1.97959
ILMN_1722127	RAD54B	RAD54 homolog B (S. cerevisiae)	0.00137881	0.0180167	1.97786
ILMN_1749667	OBSCN	obscurin, cytoskeletal calmodulin and titin-interacting RhoGEF	0.00328049	0.0312446	1.97691
ILMN_1787434	OR10H1	olfactory receptor, family 10, subfamily H, member 1	0.00157506	0.019547	1.9755
ILMN_1727862	HPS4	Hermansky-Pudlak syndrome 4	0.00496872	0.0412327	1.97483
ILMN_2092390	CXorf20	BEN domain containing 2	0.00581092	0.0452908	1.97429
ILMN_1677392	KRTAP10-7	keratin associated protein 10-7	0.00509079	0.0419195	1.97411
ILMN_1748915	S100A12	S100 calcium binding protein A12	0.000261674	0.0068385	1.97247
ILMN_1658576	PTPRN	protein tyrosine phosphatase, receptor type, N	0.00371151	0.0340507	1.97196
ILMN_2082699	KLHL38	kelch-like 38 (Drosophila)	1.91293e-06	0.000632291	1.97127
ILMN_1676978	SNX15	sorting nexin 15	0.00400683	0.0357605	1.96407
ILMN_1712396	GJD2	gap junction protein, delta 2, 36kDa	0.0016206	0.0198394	1.96212
ILMN_1676066	ASB4	ankyrin repeat and SOCS box-containing 4	0.00045504	0.00920593	1.96134
ILMN_1745580	ADAD1	adenosine deaminase domain containing 1 (testis-specific)	0.00506465	0.0417923	1.95081
ILMN_1710394	CNTNAP5	contactin associated protein-like 5	0.000776508	0.0127985	1.94734
ILMN_1759549	SRGAP2	SLIT-ROBO Rho GTPase activating protein 2	0.00406264	0.0360734	1.9451
ILMN_1746820	NLRP4	NLR family, pyrin domain containing 4	0.00315856	0.030533	1.94369
ILMN_1679693	TMEM87B	transmembrane protein 87B	0.00187968	0.0218384	1.93892
ILMN_2156699	ACOT6	acyl-CoA thioesterase 6	0.00218	0.0239739	1.93708
ILMN_2174023	C9orf36	family with sequence similarity 75, member A1	0.00450623	0.0385957	1.92829
ILMN_2173919	MYO9A	myosin IXA	0.00127157	0.0172182	1.92804
ILMN_1665682	IL15RA	interleukin 15 receptor, alpha	0.00308984	0.0300823	1.92769
ILMN_1743331	ADIG	adipogenin	0.000808236	0.0129836	1.92731
ILMN_1759261	C16orf55	chromosome 16 open reading frame 55	0.00430306	0.0375965	1.92178
ILMN_1658951	PPP2R4	protein phosphatase 2A activator, regulatory subunit 4	0.000873202	0.0136252	1.92159
ILMN_1666526	PITX3	paired-like homeodomain 3	0.0033299	0.0315615	1.91964
ILMN_1733627	NEDD4L	neural precursor cell expressed, developmentally down-regulated 4-like	0.00171012	0.0204865	1.91931
ILMN_1728191	ANP32D	acidic (leucine-rich) nuclear phosphoprotein 32 family, member D	0.000377989	0.00834272	1.91527
ILMN_1747397	SLC7A8	solute carrier family 7 (amino acid transporter, L-type), member 8	0.00115206	0.0162667	1.91095
ILMN_1661307	JRK	jerky homolog (mouse)	0.00131934	0.01756	1.91046
ILMN_1780298	FAM86A	family with sequence similarity 86, member A	0.00367344	0.033847	1.90363
ILMN_2205405	HLA-DPB2	major histocompatibility complex, class II, DP beta 2 (pseudogene)	0.00107284	0.0155225	1.89826
ILMN_1675437	FNDC3A	fibronectin type III domain containing 3A	0.00314696	0.030501	1.88747
ILMN_1812641	OPRM1	opioid receptor, mu 1	0.00114642	0.0162074	1.88459
ILMN_2100357	SMPDL3A	sphingomyelin phosphodiesterase, acid-like 3A	0.00183859	0.0215203	1.8813
ILMN_1720755	C10orf71	chromosome 10 open reading frame 71	4.55062e-05	0.00288482	1.87619
ILMN_1658271	LSS	lanosterol synthase (2,3-oxidosqualene-lanosterol cyclase)	0.00405041	0.036033	1.87541
ILMN_1660126	ARR3	arrestin 3, retinal (X-arrestin)	0.00468704	0.0397096	1.87217
ILMN_1722869	PDZD3	PDZ domain containing 3	0.00276772	0.028009	1.87086
ILMN_2091755	LANCL3	LanC lantibiotic synthetase component C-like 3 (bacterial)	0.00597169	0.0460081	1.86787
ILMN_1652171	CDKN2C	cyclin-dependent kinase inhibitor 2C (p18, inhibits CDK4)	0.000869266	0.0136252	1.86771
ILMN_1808546	CASC2	cancer susceptibility candidate 2	0.000572089	0.0106133	1.86664
ILMN_1749636	DNAJC22	DnaJ (Hsp40) homolog, subfamily C, member 22	0.00609849	0.0466515	1.85884
ILMN_2363475	CSH1	chorionic somatomammotropin hormone 1 (placental lactogen)	0.00428569	0.0375707	1.85792
ILMN_1714818	SSX5	synovial sarcoma, X breakpoint 5	0.00258342	0.0267083	1.85585
ILMN_1722390	CHRAC1	chromatin accessibility complex 1	0.00411664	0.0364151	1.85152
ILMN_1663561	TCF2	HNF1 homeobox B	0.00102656	0.0150476	1.85118
ILMN_1663873	MMP13	matrix metallopeptidase 13 (collagenase 3)	0.00389602	0.0351931	1.84703
ILMN_1738212	GALNTL5	UDP-N-acetyl-alpha-D-galactosamine:polypeptide N-acetylgalactosaminyltransferase-like 5	0.00431734	0.0376792	1.84335
ILMN_1711368	TRAPPC9	trafficking protein particle complex 9	0.00351204	0.0327658	1.84077
ILMN_1804283	GNAS	GNAS complex locus	0.000806319	0.0129739	1.84044
ILMN_2297353	TRPV4	transient receptor potential cation channel, subfamily V, member 4	0.000322634	0.00771461	1.83779
ILMN_2165289	DEFA3	defensin, alpha 3, neutrophil-specific	0.00488201	0.0407436	1.83659
ILMN_1688242	C6	complement component 6	0.0059069	0.0456891	1.82926
ILMN_1702177	GLO1	glyoxalase I	0.00416127	0.0367768	1.82827
ILMN_1686659	OR1I1	olfactory receptor, family 1, subfamily I, member 1	0.00102518	0.0150392	1.82804
ILMN_1717462	NPVF	neuropeptide VF precursor	0.000969548	0.0145732	1.82405
ILMN_1746086	CPO	carboxypeptidase O	0.00449235	0.0385471	1.81979
ILMN_1755818	BGLAP	bone gamma-carboxyglutamate (gla) protein	0.000166932	0.00530115	1.81663
ILMN_1747078	HYLS1	hydrolethalus syndrome 1	0.00193075	0.0222768	1.8155
ILMN_1655468	DSG3	desmoglein 3	0.00442018	0.0382213	1.81431
ILMN_2303010	KCNC2	potassium voltage-gated channel, Shaw-related subfamily, member 2	0.00249905	0.0260833	1.81133
ILMN_1655572	C6orf59	non-protein coding RNA 241	0.00285133	0.0286943	1.80366
ILMN_2266962	GYPE	glycophorin E (MNS blood group)	0.00226202	0.0245424	1.80338
ILMN_1706478	HOXA7	homeobox A7	0.00221562	0.0242633	1.79994
ILMN_1668779	GPR17	G protein-coupled receptor 17	0.00515778	0.042293	1.79975
ILMN_1766103	KCNK18	potassium channel, subfamily K, member 18	0.000679664	0.0118502	1.79686
ILMN_2286574	EPHA3	EPH receptor A3	0.000449534	0.0091816	1.79649
ILMN_2365410	TRNAU1AP	tRNA selenocysteine 1 associated protein 1	0.00125469	0.0170743	1.79646
ILMN_1691295	PVRL1	poliovirus receptor-related 1 (herpesvirus entry mediator C)	0.000419291	0.00887279	1.796
ILMN_2323172	CSF3R	colony stimulating factor 3 receptor (granulocyte)	0.00569439	0.0447541	1.79303
ILMN_2292334	UBTF	upstream binding transcription factor, RNA polymerase I	0.00479419	0.0402109	1.79221
ILMN_1788040	ZPBP2	zona pellucida binding protein 2	0.00471283	0.0398623	1.78712
ILMN_1685954	HMBS	hydroxymethylbilane synthase	0.00300154	0.0296209	1.77928
ILMN_1720482	CEND1	cell cycle exit and neuronal differentiation 1	0.00319262	0.0307319	1.77217
ILMN_1700353	TRAF6	TNF receptor-associated factor 6	0.00464197	0.0394131	1.77128
ILMN_2248970	OAS2	2'-5'-oligoadenylate synthetase 2, 69/71kDa	0.000195594	0.00582513	1.77043
ILMN_2295387	FAM153A	family with sequence similarity 153, member A	0.00331234	0.0314712	1.76566
ILMN_1811072	KCNAB1	potassium voltage-gated channel, shaker-related subfamily, beta member 1	0.00652413	0.0486057	1.76497
ILMN_1796560	PFKFB2	6-phosphofructo-2-kinase/fructose-2,6-biphosphatase 2	0.00499795	0.041402	1.7507
ILMN_2366795	KIF27	kinesin family member 27	0.00107018	0.0154936	1.75062
ILMN_1702199	FAM19A1	family with sequence similarity 19 (chemokine (C-C motif)-like), member A1	0.00258989	0.0267634	1.74163
ILMN_1808494	ITIH2	inter-alpha (globulin) inhibitor H2	0.00304546	0.0298168	1.7411
ILMN_1679870	OR11H12	olfactory receptor, family 11, subfamily H, member 12	0.00339192	0.0319949	1.73342
ILMN_1710682	SUOX	sulfite oxidase	0.0024229	0.025498	1.73281
ILMN_1660963	CCIN	calicin	0.00136473	0.0179425	1.73129
ILMN_1662484	CLDN18	claudin 18	0.00464532	0.0394273	1.7275
ILMN_2279834	ZNF483	zinc finger protein 483	0.00206238	0.0230805	1.72636
ILMN_1761994	SMAD5	SMAD family member 5	0.00114509	0.0161982	1.72304
ILMN_2150446	FAM75A2	family with sequence similarity 75, member A2	0.00232908	0.0249242	1.71372
ILMN_1696051	SNX11	sorting nexin 11	0.00351428	0.0327664	1.71366
ILMN_1773114	GRIK1	glutamate receptor, ionotropic, kainate 1	0.00579193	0.0451578	1.71026
ILMN_2059165	KRTAP4-2	keratin associated protein 4-2	0.00549318	0.0437647	1.70671
ILMN_1710312	TMEM31	transmembrane protein 31	0.00285703	0.028727	1.70641
ILMN_2223350	C13orf1	chromosome 13 open reading frame 1	0.0017325	0.0206912	1.70594
ILMN_1711470	UBE2T	ubiquitin-conjugating enzyme E2T (putative)	0.00236868	0.025234	1.69944
ILMN_1740671	ATOH1	atonal homolog 1 (Drosophila)	0.000790207	0.0129051	1.69885
ILMN_2292123	COL4A3BP	collagen, type IV, alpha 3 (Goodpasture antigen) binding protein	0.00113011	0.0160541	1.69229
ILMN_1813568	TRPV1	transient receptor potential cation channel, subfamily V, member 1	0.00374693	0.0342818	1.68726
ILMN_1746661	ERCC8	excision repair cross-complementing rodent repair deficiency, complementation group 8	0.00636119	0.0478936	1.68633
ILMN_2367290	C4orf44	chromosome 4 open reading frame 44	0.00439578	0.0380805	1.68183
ILMN_1669425	NEUROD1	neurogenic differentiation 1	0.000563287	0.0104748	1.68142
ILMN_1769556	C5orf23	chromosome 5 open reading frame 23	0.000979581	0.0146893	1.67968
ILMN_1682592	IL19	interleukin 19	0.00159943	0.0196809	1.67678
ILMN_1735439	FTHL17	ferritin, heavy polypeptide-like 17	0.00515222	0.0422623	1.67082
ILMN_1683370	C16orf71	chromosome 16 open reading frame 71	0.00202564	0.0228547	1.66914
ILMN_1737709	RPL10L	ribosomal protein L10-like	0.00238005	0.0252606	1.66244
ILMN_1741214	NXPH4	neurexophilin 4	0.00141434	0.0182706	1.66208
ILMN_1754491	IYD	iodotyrosine deiodinase	0.00318608	0.0306941	1.66013
ILMN_2044081	DEFB106B	defensin, beta 106B	0.00304065	0.0297945	1.65843
ILMN_1669227	ADRA1A	adrenergic, alpha-1A-, receptor	0.00254282	0.0264278	1.6522
ILMN_1767362	ADAMTS6	ADAM metallopeptidase with thrombospondin type 1 motif, 6	0.00328214	0.0312476	1.65062
ILMN_1807914	ACSL5	acyl-CoA synthetase long-chain family member 5	0.000736101	0.0124101	1.63619
ILMN_1725172	PKLR	pyruvate kinase, liver and RBC	0.00112854	0.0160416	1.63419
ILMN_2119555	TMTC3	transmembrane and tetratricopeptide repeat containing 3	0.00150202	0.0189411	1.6318
ILMN_1665397	ZNF445	zinc finger protein 445	0.000861401	0.0135597	1.62711
ILMN_1717888	KHK	ketohexokinase (fructokinase)	0.00194257	0.0222779	1.62528
ILMN_2079991	ERVWE1	endogenous retroviral family W, env(C7), member 1	0.00121097	0.0167466	1.62504
ILMN_2112744	P2RX6P	purinergic receptor P2X, ligand-gated ion channel, 6 pseudogene	6.10753e-05	0.00334045	1.62477
ILMN_2129831	OR12D3	olfactory receptor, family 12, subfamily D, member 3	0.0020583	0.023074	1.62356
ILMN_1789541	CRMP1	collapsin response mediator protein 1	0.00151761	0.0190659	1.62261
ILMN_1675192	IFNA21	interferon, alpha 21	0.00398673	0.0356693	1.62076
ILMN_1695341	KCNK10	potassium channel, subfamily K, member 10	0.00590351	0.0456891	1.62048
ILMN_1806189	C16orf3	chromosome 16 open reading frame 3	0.00527575	0.0427673	1.62024
ILMN_1809842	TNNC1	troponin C type 1 (slow)	0.00555796	0.0440805	1.61916
ILMN_1722716	SLC17A1	solute carrier family 17 (sodium phosphate), member 1	0.000724015	0.0122769	1.61697
ILMN_1773546	MRGPRX3	MAS-related GPR, member X3	9.69177e-05	0.00405022	1.61316
ILMN_1691953	SPANXN3	SPANX family, member N3	0.00323666	0.0310542	1.60615
ILMN_2228132	LOC126536	uncharacterized LOC126536	0.00545843	0.0436508	1.60413
ILMN_2199768	SLITRK4	SLIT and NTRK-like family, member 4	0.00590979	0.0456891	1.60235
ILMN_1720833	C2orf48	chromosome 2 open reading frame 48	0.00502914	0.0415708	1.60083
ILMN_1777060	CTH	cystathionase (cystathionine gamma-lyase)	0.00160206	0.0196843	1.59509
ILMN_1800898	ARG2	arginase, type II	0.00134124	0.0177031	1.59055
ILMN_1659678	GABRA2	gamma-aminobutyric acid (GABA) A receptor, alpha 2	0.00503072	0.0415708	1.5889
ILMN_1703667	KCNJ4	potassium inwardly-rectifying channel, subfamily J, member 4	0.00522756	0.0424941	1.58859
ILMN_1717707	PSTK	phosphoseryl-tRNA kinase	0.00069887	0.0120243	1.58836
ILMN_1764271	NXPH1	neurexophilin 1	0.00352927	0.0328932	1.58748
ILMN_1765584	TMEM38A	transmembrane protein 38A	0.00377584	0.0344791	1.57686
ILMN_2240109	NR1I2	nuclear receptor subfamily 1, group I, member 2	0.00620502	0.0471503	1.57629
ILMN_2195385	GAGE4	G antigen 4	2.44842e-05	0.00215204	1.57578
ILMN_1760314	CCDC8	coiled-coil domain containing 8	0.000692199	0.0119533	1.57343
ILMN_1781679	SHOX	short stature homeobox	0.00490148	0.0408915	1.57317
ILMN_1753648	SPRYD5	SPRY domain containing 5	0.00236368	0.025214	1.56642
ILMN_1767657	MAT1A	methionine adenosyltransferase I, alpha	0.000749353	0.0125518	1.56405
ILMN_1685858	MLN	motilin	0.00365041	0.033701	1.55777
ILMN_1677624	NXPH2	neurexophilin 2	0.00638792	0.0480047	1.5548
ILMN_1760757	BRIP1	BRCA1 interacting protein C-terminal helicase 1	8.81873e-05	0.00385476	1.55451
ILMN_1709772	SNX5	sorting nexin 5	0.000592729	0.0108036	1.55293
ILMN_2100834	ZNF528	zinc finger protein 528	0.00177753	0.0210363	1.55059
ILMN_1703743	AATF	apoptosis antagonizing transcription factor	0.00210507	0.0234417	1.54877
ILMN_2159721	DUX4	double homeobox 4	0.000133935	0.00467737	1.54093
ILMN_2149971	SPINK6	serine peptidase inhibitor, Kazal type 6	0.0024907	0.0260364	1.52167
ILMN_1807994	PCNP	PEST proteolytic signal containing nuclear protein	0.00551383	0.0438342	1.51836
ILMN_1665748	DCC	deleted in colorectal carcinoma	0.00094945	0.0143944	1.50166
ILMN_1727040	ARTN	artemin	0.00378149	0.0345173	1.50043
ILMN_2050183	MYLK2	myosin light chain kinase 2	0.0022184	0.0242823	1.49959
ILMN_1735584	ST8SIA5	ST8 alpha-N-acetyl-neuraminide alpha-2,8-sialyltransferase 5	0.00519471	0.0424033	1.49612
ILMN_1672094	DLX1	distal-less homeobox 1	0.00429233	0.0375772	1.48445
ILMN_1681967	C10orf4	fragile site, folic acid type, rare, fra(10)(q23.3) or fra(10)(q24.2) candidate 1	0.000918832	0.0140844	1.47613
ILMN_1766370	PHLDB3	pleckstrin homology-like domain, family B, member 3	0.00303946	0.0297945	1.47352
ILMN_1667791	PPFIA4	protein tyrosine phosphatase, receptor type, f polypeptide (PTPRF), interacting protein (liprin), alpha 4	0.00116681	0.016387	1.46463
ILMN_1709847	KCNJ13	potassium inwardly-rectifying channel, subfamily J, member 13	0.00127792	0.0172656	1.46442
ILMN_2279339	WTAP	Wilms tumor 1 associated protein	0.00546747	0.0436909	1.46367
ILMN_1769910	ULBP3	UL16 binding protein 3	7.93857e-05	0.00364106	1.45735
ILMN_1658396	SPEF2	sperm flagellar 2	0.000606884	0.0110065	1.45597
ILMN_1715540	TRAIP	TRAF interacting protein	0.00494299	0.0410627	1.45448
ILMN_1754510	TAAR5	trace amine associated receptor 5	0.0045956	0.0391326	1.44543
ILMN_1693530	PSG3	pregnancy specific beta-1-glycoprotein 3	0.000359476	0.00815965	1.44185
ILMN_1803033	MGST1	microsomal glutathione S-transferase 1	0.000274501	0.00706209	1.44035
ILMN_1676424	METTL1	methyltransferase like 1	0.00506808	0.0418058	1.43939
ILMN_1703749	OR5T3	olfactory receptor, family 5, subfamily T, member 3	0.00635605	0.0478856	1.43917
ILMN_1794552	GAP43	growth associated protein 43	0.00086365	0.0135845	1.43026
ILMN_1754244	MYH8	myosin, heavy chain 8, skeletal muscle, perinatal	0.00236118	0.0251989	1.42386
ILMN_1731547	GIF	gastric intrinsic factor (vitamin B synthesis)	0.00434568	0.037866	1.42324
ILMN_2106002	ACBD7	acyl-CoA binding domain containing 7	1.09139e-05	0.00141506	1.41896
ILMN_2210739	CDH12P	cadherin 12 (N-cadherin 2) pseudogene 2	0.0055119	0.0438337	1.41858
ILMN_1695353	ASCL3	achaete-scute complex homolog 3 (Drosophila)	0.000372935	0.00829998	1.40925
ILMN_2186216	GOLPH4	golgi integral membrane protein 4	0.00329837	0.0313766	1.40763
ILMN_1676197	LRP11	low density lipoprotein receptor-related protein 11	0.000691349	0.0119474	1.40358
ILMN_2110094	CFC1	cripto, FRL-1, cryptic family 1	0.000353076	0.00806157	1.40261
ILMN_1679897	IGFL3	IGF-like family member 3	0.00168483	0.0202976	1.39407
ILMN_1775357	RUNDC2A	RUN domain containing 2A	0.00389571	0.0351931	1.37274
ILMN_2114972	FGB	fibrinogen beta chain	0.000129561	0.00463498	1.35647
ILMN_2289887	SEPN1	selenoprotein N, 1	0.00103588	0.0151475	1.34768
ILMN_2153679	TBC1D3B	TBC1 domain family, member 3B	1.73246e-05	0.00181506	1.34627
ILMN_1702609	B3GNT5	UDP-GlcNAc:betaGal beta-1,3-N-acetylglucosaminyltransferase 5	0.00160381	0.0196853	1.33797
ILMN_1813650	INPP5F	inositol polyphosphate-5-phosphatase F	0.00259925	0.0268128	1.33371
ILMN_1747016	CEP55	centrosomal protein 55kDa	0.0011217	0.0159801	1.32382
ILMN_1668072	PGAM2	phosphoglycerate mutase 2 (muscle)	0.0017756	0.0210347	1.31736
ILMN_1761016	SPZ1	spermatogenic leucine zipper 1	0.00246893	0.0258549	1.30706
ILMN_1806394	UBL4B	ubiquitin-like 4B	0.00591264	0.0456891	1.29913
ILMN_2257749	MARCH8	membrane-associated ring finger (C3HC4) 8, E3 ubiquitin protein ligase	0.000848852	0.0134057	1.29414
ILMN_1732023	PRDM7	PR domain containing 7	1.21848e-06	0.000519915	1.29388
ILMN_2271884	CHRFAM7A	CHRNA7 (cholinergic receptor, nicotinic, alpha 7) and FAM7A (family with sequence similarity 7A) fusion	0.00436263	0.0379474	1.29177
ILMN_2366642	VCX3A	variable charge, X-linked 3A	0.00564226	0.0445384	1.29123
ILMN_1713471	ENOX1	ecto-NOX disulfide-thiol exchanger 1	0.00343283	0.0322763	1.28925
ILMN_1787257	GLP1R	glucagon-like peptide 1 receptor	0.00238152	0.0252606	1.28778
ILMN_1705352	FUT9	fucosyltransferase 9 (alpha (1,3) fucosyltransferase)	0.00274878	0.0279137	1.2865
ILMN_1701314	LOC399900	uncharacterized LOC399900	2.20239e-06	0.00064607	1.28519
ILMN_1673969	TPTE2P6	transmembrane phosphoinositide 3-phosphatase and tensin homolog 2 pseudogene 6	0.00143466	0.0183954	1.27992
ILMN_1668727	ARSB	arylsulfatase B	0.00520772	0.0424583	1.27524
ILMN_2293322	MTHFD2	methylenetetrahydrofolate dehydrogenase (NADP+ dependent) 2, methenyltetrahydrofolate cyclohydrolase	0.000101997	0.00415566	1.27342
ILMN_2148679	SDHAP3	succinate dehydrogenase complex, subunit A, flavoprotein pseudogene 3	0.000192527	0.00577211	1.27327
ILMN_1701007	PON3	paraoxonase 3	0.000421415	0.00888569	1.26687
ILMN_2233513	LRRIQ4	leucine-rich repeats and IQ motif containing 4	0.00347245	0.0325315	1.246
ILMN_1733515	LOXL3	lysyl oxidase-like 3	0.00638821	0.0480047	1.24378
ILMN_1691692	PDE9A	phosphodiesterase 9A	0.00471527	0.0398623	1.24342
ILMN_1757294	PRSS42	protease, serine, 42	0.00405835	0.03606	1.23435
ILMN_1657194	TSNAXIP1	translin-associated factor X interacting protein 1	0.00566789	0.0446255	1.23262
ILMN_1695000	TFIP11	tuftelin interacting protein 11	8.77265e-06	0.0013456	1.22269
ILMN_2078724	C14orf153	chromosome 14 open reading frame 153	6.3323e-05	0.00338518	1.22116
ILMN_2074671	KRT26	keratin 26	0.0062334	0.0473109	1.21492
ILMN_2198823	H6PD	hexose-6-phosphate dehydrogenase (glucose 1-dehydrogenase)	4.13249e-05	0.00270143	1.21342
ILMN_1656196	E2F6	E2F transcription factor 6	0.00633982	0.047794	1.21186
ILMN_2122926	VN1R2	vomeronasal 1 receptor 2	0.00589961	0.0456891	1.20929
ILMN_1705019	GDNF	glial cell derived neurotrophic factor	0.00122329	0.0168476	1.20068
ILMN_2387385	IGFBP1	insulin-like growth factor binding protein 1	0.00200996	0.0227432	1.19287
ILMN_1739375	LACRT	lacritin	0.00587417	0.0456171	1.19069
ILMN_1742467	C6orf138	chromosome 6 open reading frame 138	0.00253649	0.0263741	1.18364
ILMN_1810639	REXO1L1	REX1, RNA exonuclease 1 homolog (S. cerevisiae)-like 1	0.000193071	0.00577211	1.18298
ILMN_1702241	FLJ45445	uncharacterized LOC399844	1.62178e-05	0.00177022	1.17464
ILMN_2314140	PAX6	paired box 6	0.00440284	0.0381115	1.1678
ILMN_1754592	EDARADD	EDAR-associated death domain	0.00464763	0.0394326	1.16592
ILMN_2181670	SYT14	synaptotagmin XIV	0.00611356	0.0467187	1.16546
ILMN_1675331	PEG3	paternally expressed 3	0.00640768	0.0480432	1.16111
ILMN_1809491	CCDC144NL	coiled-coil domain containing 144 family, N-terminal like	0.00180461	0.0212178	1.15999
ILMN_1719570	BICC1	bicaudal C homolog 1 (Drosophila)	0.00661276	0.0490636	1.15907
ILMN_2410421	NBPF1	neuroblastoma breakpoint family, member 1	0.000264267	0.00689176	1.15318
ILMN_2311537	HMGA1	high mobility group AT-hook 1	1.18037e-05	0.00146611	1.13978
ILMN_2191067	DUX3	double homeobox 3	0.000352669	0.00806157	1.12811
ILMN_1661434	ACSM1	acyl-CoA synthetase medium-chain family member 1	0.00512075	0.0420781	1.12806
ILMN_1654153	BTBD11	BTB (POZ) domain containing 11	0.00152398	0.0190949	1.11574
ILMN_1762204	C1orf150	chromosome 1 open reading frame 150	0.000410897	0.0087504	1.10851
ILMN_2193443	TRIM16L	tripartite motif-containing 16-like	1.94649e-05	0.001891	1.09338
ILMN_2094416	PLGLB1	plasminogen-like B1	8.95142e-06	0.00136333	1.08156
ILMN_2389851	MDM2	Mdm2 p53 binding protein homolog (mouse)	0.000243284	0.00655499	1.0756
ILMN_2072598	LOC401357	uncharacterized LOC401357	4.07638e-07	0.000309548	1.06976
ILMN_2222750	RPL23AP7	ribosomal protein L23a pseudogene 7	0.000504236	0.00982026	1.06869
ILMN_1707828	UGT1A5	UDP glucuronosyltransferase 1 family, polypeptide A5	0.000645916	0.011501	1.0641
ILMN_2115011	FGD2	FYVE, RhoGEF and PH domain containing 2	1.47318e-05	0.00167017	1.05728
ILMN_2157932	FRMD8	FERM domain containing 8	0.00263777	0.0271029	1.05596
ILMN_1712067	CCDC135	coiled-coil domain containing 135	0.00177243	0.021029	1.04863
ILMN_2094648	PRAMEF5	PRAME family member 5	0.00324592	0.0310685	1.04773
ILMN_1695413	ZNF429	zinc finger protein 429	0.00351282	0.0327658	1.04536
ILMN_1737629	ADAM20	ADAM metallopeptidase domain 20	0.00184722	0.0215997	1.04401
ILMN_2078404	ZNF765	zinc finger protein 765	1.34407e-06	0.000545012	1.04143
ILMN_2149400	SPC25	SPC25, NDC80 kinetochore complex component, homolog (S. cerevisiae)	7.19288e-06	0.00120573	1.03883
ILMN_2346562	ZNF273	zinc finger protein 273	6.74618e-06	0.0011799	1.02704
ILMN_2262362	ABCG1	ATP-binding cassette, sub-family G (WHITE), member 1	0.000524899	0.0100394	1.02638
ILMN_2258689	SORBS1	sorbin and SH3 domain containing 1	0.000131085	0.00464381	1.02234
ILMN_2288740	ZNF266	zinc finger protein 266	6.19807e-05	0.00336704	1.01393
ILMN_1722788	C1orf49	chromosome 1 open reading frame 49	0.00293597	0.0292527	1.01194
ILMN_1709346	CLTB	clathrin, light chain B	0.00406608	0.0360767	1.00976
ILMN_2287168	SAR1B	SAR1 homolog B (S. cerevisiae)	0.000377522	0.00834272	0.991716
ILMN_1809883	CCDC134	coiled-coil domain containing 134	0.00476898	0.0401285	0.987553
ILMN_1707600	WDTC1	WD and tetratricopeptide repeats 1	0.00610944	0.0467024	0.985285
ILMN_1702247	CCNDBP1	cyclin D-type binding-protein 1	0.00656222	0.0487966	0.966096
ILMN_2297511	PODXL	podocalyxin-like	0.00012395	0.00455221	0.944536
ILMN_1656395	MYOT	myotilin	0.00652566	0.0486057	0.941746
ILMN_2217955	TTC21B	tetratricopeptide repeat domain 21B	0.000701974	0.0120688	0.938537
ILMN_2068991	TBC1D3G	TBC1 domain family, member 3G	0.000800797	0.0129718	0.933825
ILMN_2184869	ZMYM6	zinc finger, MYM-type 6	0.000432524	0.00897478	0.933024
ILMN_1770467	GAGE7	G antigen 7	0.00326923	0.0311626	0.923659
ILMN_1661194	CLDN14	claudin 14	2.14379e-06	0.00064607	0.919811
ILMN_2295318	RGPD5	RANBP2-like and GRIP domain containing 5	0.000288248	0.00729732	0.918924
ILMN_2230178	DAND5	DAN domain family, member 5	0.00199148	0.0226435	0.91627
ILMN_2077130	MSH3	mutS homolog 3 (E. coli)	5.68794e-07	0.000325572	0.91335
ILMN_2203976	GAGE2C	G antigen 2C	0.00544935	0.0436095	0.908946
ILMN_2245686	GYG2	glycogenin 2	0.000118962	0.00446687	0.890162
ILMN_2180997	GTF2IRD2B	GTF2I repeat domain containing 2B	3.57889e-05	0.00258429	0.89004
ILMN_2357377	TERF1	telomeric repeat binding factor (NIMA-interacting) 1	8.68086e-06	0.0013456	0.887165
ILMN_1684434	SLC17A5	solute carrier family 17 (anion/sugar transporter), member 5	0.00675962	0.0499165	0.877665
ILMN_1712122	FANCD2	Fanconi anemia, complementation group D2	0.00562215	0.0444544	0.877538
ILMN_2281089	STEAP3	STEAP family member 3	0.000255556	0.00676391	0.870813
ILMN_2272876	SYT15	synaptotagmin XV	0.00307757	0.0300637	0.867854
ILMN_2204664	NBPF14	neuroblastoma breakpoint family, member 14	0.00232256	0.024882	0.861245
ILMN_1739199	FAM39DP	WAS protein family homolog 3 pseudogene	0.000370838	0.00828052	0.841242
ILMN_2260833	CCNB1IP1	cyclin B1 interacting protein 1	0.000167316	0.00530619	0.836128
ILMN_2298365	PPP2R2B	protein phosphatase 2, regulatory subunit B, beta	2.92558e-06	0.000715183	0.834189
ILMN_1668291	ZNF780B	zinc finger protein 780B	0.00585627	0.0455207	0.831841
ILMN_2127936	ZNF100	zinc finger protein 100	2.73835e-05	0.0022525	0.824233
ILMN_2291619	RAB3IP	RAB3A interacting protein (rabin3)	0.00014335	0.00486107	0.798828
ILMN_2246134	PDE4DIP	phosphodiesterase 4D interacting protein	0.00569823	0.0447694	0.789318
ILMN_2273224	SLC4A5	solute carrier family 4, sodium bicarbonate cotransporter, member 5	0.00659643	0.0489579	0.788448
ILMN_2260756	GSDMB	gasdermin B	5.36119e-05	0.00312125	0.780537
ILMN_2175831	MTFMT	mitochondrial methionyl-tRNA formyltransferase	0.000297509	0.00738829	0.76993
ILMN_2141650	MALAT1	metastasis associated lung adenocarcinoma transcript 1 (non-protein coding)	0.00522008	0.0424627	0.763169
ILMN_2084489	ZNF595	zinc finger protein 595	0.00248629	0.0260135	0.708783
ILMN_2098499	TTTY12	testis-specific transcript, Y-linked 12 (non-protein coding)	0.00238113	0.0252606	0.706105
ILMN_2190850	PPID	peptidylprolyl isomerase D	9.62133e-06	0.00136333	0.705388
ILMN_2271014	ALG8	asparagine-linked glycosylation 8, alpha-1,3-glucosyltransferase homolog (S. cerevisiae)	0.00486114	0.0406128	0.652959
ILMN_2075794	NLRP8	NLR family, pyrin domain containing 8	0.00114228	0.0161878	0.641361
ILMN_2168952	DENR	density-regulated protein	0.00628648	0.047552	0.61385
ILMN_2415979	KIAA1751	KIAA1751	0.000114826	0.00436352	0.608384
ILMN_1678707	TAF15	TAF15 RNA polymerase II, TATA box binding protein (TBP)-associated factor, 68kDa	0.000127704	0.0046269	0.597518
ILMN_2141523	MRPL44	mitochondrial ribosomal protein L44	2.50321e-05	0.00218384	0.592396
ILMN_2155719	NBPF10	neuroblastoma breakpoint family, member 10	3.13589e-05	0.00240274	0.568505
ILMN_2112730	SLC9A4	solute carrier family 9 (sodium/hydrogen exchanger), member 4	7.36402e-05	0.00351258	0.566083
ILMN_2270299	TP53BP2	tumor protein p53 binding protein, 2	2.30898e-05	0.00211782	0.53897
ILMN_2179579	SNHG3	small nucleolar RNA host gene 3 (non-protein coding)	0.000406374	0.00872124	0.529592
ILMN_2353754	TPM3	tropomyosin 3	2.31189e-05	0.00211782	0.527389
ILMN_2285490	PPIL3	peptidylprolyl isomerase (cyclophilin)-like 3	0.00354699	0.0330321	0.526897
ILMN_2054554	DTWD2	DTW domain containing 2	9.64143e-05	0.00404045	0.506479
ILMN_2138689	TFAMP1	transcription factor A, mitochondrial pseudogene 1	0.000428984	0.00896238	0.500636
ILMN_2412521	KIAA0101	KIAA0101	0.00105585	0.0153429	0.500524
ILMN_2273595	TEX11	testis expressed 11	0.000444129	0.0091085	0.483511
ILMN_1808157	RUNDC3B	RUN domain containing 3B	0.00406595	0.0360767	0.479428
ILMN_2274775	SLC44A4	solute carrier family 44, member 4	0.00599217	0.046094	0.477223
ILMN_1801476	CDS1	CDP-diacylglycerol synthase (phosphatidate cytidylyltransferase) 1	0.00538261	0.0433207	0.452781
ILMN_2406132	LILRB3	leukocyte immunoglobulin-like receptor, subfamily B (with TM and ITIM domains), member 3	0.00576836	0.0450836	0.433644
ILMN_2330495	OCIAD1	OCIA domain containing 1	7.6903e-05	0.00358866	0.422388
ILMN_2235707	ITIH5	inter-alpha (globulin) inhibitor H5	0.0047873	0.0401919	0.417849
ILMN_1785926	ZNF621	zinc finger protein 621	0.00652619	0.0486057	0.401492
ILMN_2342455	PPA2	pyrophosphatase (inorganic) 2	0.00427257	0.0374893	0.36816
ILMN_2233279	C19orf31	transmembrane protein 59-like	0.00308964	0.0300823	0.362651
ILMN_2052495	DNHL1	dynein, axonemal, heavy chain 6	0.00453757	0.0388074	0.344711
ILMN_2409078	SNHG10	small nucleolar RNA host gene 10 (non-protein coding)	2.40759e-06	0.000649441	0.342379
ILMN_1656676	ZYG11B	zyg-11 homolog B (C. elegans)	7.28833e-05	0.00350874	0.331757
ILMN_2387696	CCR6	chemokine (C-C motif) receptor 6	0.000608497	0.0110272	0.29131
ILMN_2150654	ZSWIM4	zinc finger, SWIM-type containing 4	0.00146625	0.0187214	0.289
ILMN_2242491	CLUAP1	clusterin associated protein 1	0.00620351	0.0471503	0.230003
ILMN_2365549	BRPF1	bromodomain and PHD finger containing, 1	0.00510034	0.0419834	0.21308
ILMN_1776188	MAP1LC3A	microtubule-associated protein 1 light chain 3 alpha	0.000995108	0.014818	-0.164864
ILMN_1730734	TMEM205	transmembrane protein 205	0.00663409	0.0491908	-0.235299
ILMN_1807873	SNX6	sorting nexin 6	0.00443755	0.0382958	-0.268445
ILMN_2232166	CCDC90B	coiled-coil domain containing 90B	0.0026749	0.0273528	-0.271269
ILMN_1737585	VARS2	valyl-tRNA synthetase 2, mitochondrial (putative)	0.000872395	0.0136252	-0.275352
ILMN_1777881	TSPAN17	tetraspanin 17	0.00054498	0.0102996	-0.288205
ILMN_2331501	UBC	ubiquitin C	0.00450144	0.0385828	-0.301986
ILMN_1789457	GNL1	guanine nucleotide binding protein-like 1	0.0020758	0.0231975	-0.327851
ILMN_1763852	ACACB	acetyl-CoA carboxylase beta	0.00324162	0.0310617	-0.341854
ILMN_1814022	NR1H3	nuclear receptor subfamily 1, group H, member 3	0.00349927	0.0326914	-0.345469
ILMN_1651832	EHD1	EH-domain containing 1	0.00326823	0.0311626	-0.388339
ILMN_1806432	NT5C	5', 3'-nucleotidase, cytosolic	0.00104275	0.0152185	-0.409448
ILMN_1669966	NDUFS7	NADH dehydrogenase (ubiquinone) Fe-S protein 7, 20kDa (NADH-coenzyme Q reductase)	0.00583005	0.0454098	-0.415256
ILMN_2208802	NPIP	nuclear pore complex interacting protein	0.000493672	0.00968244	-0.418536
ILMN_1693270	SUSD2	sushi domain containing 2	0.00294474	0.0292845	-0.44317
ILMN_2327276	STAU1	staufen, RNA binding protein, homolog 1 (Drosophila)	0.00165738	0.0201016	-0.447423
ILMN_2077094	C11orf2	chromosome 11 open reading frame 2	8.15889e-05	0.00371792	-0.457737
ILMN_1779185	SPECC1L	cytospin A	0.00550886	0.0438337	-0.47188
ILMN_1718706	ERAL1	Era G-protein-like 1 (E. coli)	0.00665044	0.0492497	-0.472512
ILMN_1749345	STX5	syntaxin 5	0.00379123	0.0345693	-0.481666
ILMN_1778240	GFOD1	glucose-fructose oxidoreductase domain containing 1	0.00427481	0.0374893	-0.484112
ILMN_1719316	TMED3	transmembrane emp24 protein transport domain containing 3	0.00420924	0.037056	-0.487203
ILMN_2199389	VIPR1	vasoactive intestinal peptide receptor 1	0.00418615	0.0369048	-0.487736
ILMN_1779015	ZNF467	zinc finger protein 467	0.00242236	0.025498	-0.488137
ILMN_1656145	GOT1	glutamic-oxaloacetic transaminase 1, soluble (aspartate aminotransferase 1)	0.00162413	0.0198723	-0.496904
ILMN_1777794	PRKCSH	protein kinase C substrate 80K-H	0.00445723	0.0384078	-0.514096
ILMN_1795678	POLR3C	polymerase (RNA) III (DNA directed) polypeptide C (62kD)	0.00262497	0.0270306	-0.516329
ILMN_1794306	USP28	ubiquitin specific peptidase 28	0.00391417	0.0353016	-0.517612
ILMN_2319994	RPL3	ribosomal protein L3	0.00128105	0.017278	-0.51935
ILMN_1705617	CFL1	cofilin 1 (non-muscle)	0.00435307	0.0378924	-0.519759
ILMN_2122511	CCBE1	collagen and calcium binding EGF domains 1	0.00147904	0.0188073	-0.521527
ILMN_1812403	BCAP31	B-cell receptor-associated protein 31	0.00192396	0.0222203	-0.526073
ILMN_1703433	PLSCR3	phospholipid scramblase 3	0.00448418	0.0385291	-0.526264
ILMN_1749410	PKP4	plakophilin 4	0.000362044	0.00819055	-0.528184
ILMN_2388507	AKT1	v-akt murine thymoma viral oncogene homolog 1	0.00571777	0.0448778	-0.53546
ILMN_1763080	QARS	glutaminyl-tRNA synthetase	0.00545026	0.0436095	-0.542416
ILMN_2188119	ARL16	ADP-ribosylation factor-like 16	0.00186987	0.0217669	-0.546492
ILMN_1766054	ABCA1	ATP-binding cassette, sub-family A (ABC1), member 1	0.00259267	0.0267749	-0.549237
ILMN_1805161	LZTR1	leucine-zipper-like transcription regulator 1	0.000293561	0.00733694	-0.554617
ILMN_1739876	RAB3GAP1	RAB3 GTPase activating protein subunit 1 (catalytic)	0.00389012	0.0351669	-0.562966
ILMN_1733110	RASSF7	Ras association (RalGDS/AF-6) domain family (N-terminal) member 7	0.00250999	0.0261798	-0.568724
ILMN_1654690	CECR5	cat eye syndrome chromosome region, candidate 5	0.00610179	0.0466591	-0.569342
ILMN_1742618	XAF1	XIAP associated factor 1	0.00282039	0.0284439	-0.571092
ILMN_1798256	UPP1	uridine phosphorylase 1	5.32268e-06	0.00104094	-0.572584
ILMN_1759184	C19orf48	chromosome 19 open reading frame 50	0.00588545	0.0456594	-0.576071
ILMN_1734696	FRG1	FSHD region gene 1	0.00577118	0.0450836	-0.577441
ILMN_1789596	ETV6	ets variant 6	0.00153467	0.0191722	-0.581249
ILMN_1792314	ACTR1A	ARP1 actin-related protein 1 homolog A, centractin alpha (yeast)	0.00173434	0.0207027	-0.581449
ILMN_1808356	FAM3A	family with sequence similarity 3, member A	0.0036224	0.0335675	-0.582605
ILMN_1767894	POLB	polymerase (DNA directed), beta	0.00516973	0.0423446	-0.584431
ILMN_1809013	MYL6	myosin, light chain 6, alkali, smooth muscle and non-muscle	0.0051321	0.0421414	-0.584455
ILMN_2336595	ACSS2	acyl-CoA synthetase short-chain family member 2	0.00604542	0.0463337	-0.585816
ILMN_2410540	CASP2	caspase 2, apoptosis-related cysteine peptidase	0.00166942	0.0201951	-0.587856
ILMN_1688373	LST1	leukocyte specific transcript 1	0.00148634	0.0188243	-0.592389
ILMN_1689160	DPEP2	dipeptidase 2	0.00363432	0.0336185	-0.597264
ILMN_2048793	CIAO1	cytosolic iron-sulfur protein assembly 1	0.000545857	0.0102996	-0.599287
ILMN_1680134	CARM1	coactivator-associated arginine methyltransferase 1	0.00525669	0.042657	-0.601969
ILMN_1663866	TGFBI	transforming growth factor, beta-induced, 68kDa	0.00400647	0.0357605	-0.602538
ILMN_1713189	C12orf41	chromosome 12 open reading frame 41	0.00379753	0.0345964	-0.603735
ILMN_1667883	THOC5	THO complex 5	0.000218528	0.00619372	-0.606642
ILMN_2200636	KIAA1267	KIAA1267	0.00215029	0.0237605	-0.611962
ILMN_1659462	DUSP23	dual specificity phosphatase 23	0.000334285	0.00786861	-0.612523
ILMN_1723123	FGFR3	fibroblast growth factor receptor 3	0.00149311	0.0188795	-0.612708
ILMN_1812031	PALM	paralemmin	0.000898332	0.0138789	-0.616192
ILMN_2139351	ZNF232	zinc finger protein 232	0.00538058	0.0433207	-0.616727
ILMN_1726466	HDHD3	haloacid dehalogenase-like hydrolase domain containing 3	0.000884002	0.0137144	-0.617661
ILMN_1731648	FOXJ2	forkhead box J2	0.00104169	0.0152124	-0.620588
ILMN_1736567	CD74	CD74 molecule, major histocompatibility complex, class II invariant chain	0.005322	0.0429789	-0.621975
ILMN_1784364	STARD5	StAR-related lipid transfer (START) domain containing 5	0.00164626	0.0200595	-0.622912
ILMN_2175474	MTRF1L	mitochondrial translational release factor 1-like	0.00472241	0.0399084	-0.625491
ILMN_1765204	ST13	suppression of tumorigenicity 13 (colon carcinoma) (Hsp70 interacting protein)	0.00547909	0.043727	-0.627021
ILMN_1737084	TXLNA	taxilin alpha	0.0029441	0.0292845	-0.62779
ILMN_1658289	WDR54	WD repeat domain 54	0.00574008	0.0449927	-0.628031
ILMN_1721495	ADAMTSL2	ADAMTS-like 2	0.00485337	0.0405912	-0.630018
ILMN_2075643	ANKRD29	ankyrin repeat domain 29	0.0022017	0.0241593	-0.630892
ILMN_1760509	EOMES	eomesodermin	0.00429927	0.0375774	-0.63329
ILMN_1798581	MCM8	minichromosome maintenance complex component 8	0.00643083	0.0481399	-0.634242
ILMN_1769451	ILVBL	ilvB (bacterial acetolactate synthase)-like	0.00241014	0.0254666	-0.634747
ILMN_1662331	PDSS2	prenyl (decaprenyl) diphosphate synthase, subunit 2	0.000415455	0.00881547	-0.636281
ILMN_2222101	N4BP2	NEDD4 binding protein 2	0.00550934	0.0438337	-0.638012
ILMN_2364022	SLC16A3	solute carrier family 16, member 3 (monocarboxylic acid transporter 4)	0.00491459	0.0409427	-0.638127
ILMN_1656368	ALDH4A1	aldehyde dehydrogenase 4 family, member A1	0.00205176	0.0230386	-0.639671
ILMN_1775708	SLC2A3	solute carrier family 2 (facilitated glucose transporter), member 3	0.00618312	0.0470617	-0.64229
ILMN_2082314	TOM1	target of myb1 (chicken)	0.00185675	0.0216895	-0.643636
ILMN_2224907	C4orf34	chromosome 4 open reading frame 34	0.000780058	0.0128286	-0.646628
ILMN_2399036	SEPN1	selenoprotein N, 1	0.0020578	0.023074	-0.649005
ILMN_1772218	HLA-DPA1	major histocompatibility complex, class II, DP alpha 1	0.00377083	0.0344468	-0.650788
ILMN_1705144	ULK1	unc-51-like kinase 1 (C. elegans)	0.000611495	0.0110644	-0.652262
ILMN_1712975	YIF1A	Yip1 interacting factor homolog A (S. cerevisiae)	0.00111676	0.0159416	-0.652812
ILMN_1695962	SLC12A9	solute carrier family 12 (potassium/chloride transporters), member 9	0.000829029	0.0132163	-0.657145
ILMN_1674386	PITX1	paired-like homeodomain 1	0.00107803	0.0155688	-0.658064
ILMN_2343775	RPL38	ribosomal protein L38	0.00554417	0.0440008	-0.661074
ILMN_1674908	HOXB5	homeobox B5	0.00130449	0.0174588	-0.661849
ILMN_2324561	SLC7A6	solute carrier family 7 (cationic amino acid transporter, y+ system), member 6	0.00544846	0.0436095	-0.662737
ILMN_1783304	ATP1B3	ATPase, Na+/K+ transporting, beta 3 polypeptide	0.00603807	0.0463225	-0.666139
ILMN_1729749	HERC5	hect domain and RLD 5	0.00437267	0.0379644	-0.66619
ILMN_2371280	CSF3R	colony stimulating factor 3 receptor (granulocyte)	0.00474507	0.0399823	-0.670689
ILMN_1743829	ATXN2	ataxin 2	0.00600529	0.0461467	-0.670758
ILMN_1680347	ZNF317	zinc finger protein 317	3.31052e-06	0.000796519	-0.670855
ILMN_2070300	LSM2	LSM2 homolog, U6 small nuclear RNA associated (S. cerevisiae)	0.00653596	0.0486631	-0.671379
ILMN_1732923	SIPA1L2	signal-induced proliferation-associated 1 like 2	0.0039593	0.0355239	-0.673604
ILMN_2082810	BRD7	bromodomain containing 7	0.00315111	0.0305201	-0.676172
ILMN_1701832	RPL19	ribosomal protein L19	0.000949487	0.0143944	-0.678223
ILMN_1718972	MFSD3	major facilitator superfamily domain containing 3	0.00359046	0.033331	-0.678439
ILMN_2277676	ERCC1	excision repair cross-complementing rodent repair deficiency, complementation group 1	0.00119687	0.0166498	-0.679325
ILMN_1694057	EIF3K	eukaryotic translation initiation factor 3, subunit K	0.00045737	0.00921721	-0.683147
ILMN_1789830	CFLAR	CASP8 and FADD-like apoptosis regulator	0.0018307	0.0214922	-0.684995
ILMN_1711919	SCYL2	SCY1-like 2 (S. cerevisiae)	0.00617484	0.0470338	-0.685938
ILMN_1669599	DENND4C	DENN/MADD domain containing 4C	0.0047831	0.0401916	-0.688353
ILMN_2368292	TSEN34	tRNA splicing endonuclease 34 homolog (S. cerevisiae)	0.00618839	0.0470759	-0.688938
ILMN_2365465	XBP1	X-box binding protein 1	0.00469229	0.0397397	-0.69089
ILMN_1681846	ZNF540	zinc finger protein 540	0.00319885	0.0307792	-0.691709
ILMN_1690982	DDT	D-dopachrome tautomerase	0.00249504	0.0260586	-0.696076
ILMN_1688515	ZNF195	zinc finger protein 195	0.0012392	0.0169571	-0.697506
ILMN_1677200	CYFIP2	cytoplasmic FMR1 interacting protein 2	0.00143059	0.0183761	-0.697579
ILMN_1793829	TMCO1	transmembrane and coiled-coil domains 1	0.00455907	0.038878	-0.699248
ILMN_2330410	EIF3C	eukaryotic translation initiation factor 3, subunit C	0.000956174	0.0144491	-0.703222
ILMN_1800787	RFTN1	raftlin, lipid raft linker 1	0.00296368	0.0293963	-0.706448
ILMN_1686367	HSPA8	heat shock 70kDa protein 8	0.000347768	0.00801711	-0.708277
ILMN_1744147	CEBPZ	CCAAT/enhancer binding protein (C/EBP), zeta	9.68398e-07	0.000469132	-0.708928
ILMN_1814859	DDX47	DEAD (Asp-Glu-Ala-Asp) box polypeptide 47	0.00621473	0.0471845	-0.709454
ILMN_1666597	PI4KB	phosphatidylinositol 4-kinase, catalytic, beta	0.00672203	0.0497015	-0.710271
ILMN_1735052	ULK1	unc-51-like kinase 1 (C. elegans)	0.00116505	0.016387	-0.710302
ILMN_1725612	NUP50	nucleoporin 50kDa	0.00612861	0.046788	-0.710897
ILMN_1791896	EBAG9	estrogen receptor binding site associated, antigen, 9	0.00276678	0.028009	-0.711281
ILMN_2094360	NR2F2	nuclear receptor subfamily 2, group F, member 2	0.00478504	0.0401916	-0.716215
ILMN_1810225	KIAA1530	KIAA1530	0.000441718	0.00910118	-0.720056
ILMN_1721978	CARD11	caspase recruitment domain family, member 11	0.00586557	0.0455655	-0.72135
ILMN_2190084	VAMP8	vesicle-associated membrane protein 8 (endobrevin)	0.00306566	0.0299895	-0.72399
ILMN_1805643	RILPL1	Rab interacting lysosomal protein-like 1	0.00308386	0.0300823	-0.724113
ILMN_2229877	PCDH18	protocadherin 18	0.00544285	0.0435948	-0.724258
ILMN_1777118	INTS9	integrator complex subunit 9	0.000133228	0.00467353	-0.725071
ILMN_1748819	MRPL22	mitochondrial ribosomal protein L22	0.00448025	0.0385138	-0.725818
ILMN_1666372	ATP5H	ATP synthase, H+ transporting, mitochondrial Fo complex, subunit d	0.00159786	0.0196809	-0.729847
ILMN_1665423	ZFP91	zinc finger protein 91 homolog (mouse)	0.00562517	0.0444633	-0.730434
ILMN_1787265	ZNF503	zinc finger protein 503	0.000952382	0.0144197	-0.731825
ILMN_2112301	DRAP1	DR1-associated protein 1 (negative cofactor 2 alpha)	0.00259711	0.0268026	-0.731877
ILMN_2407605	GIYD2	GIY-YIG domain containing 2	0.0064041	0.0480317	-0.732089
ILMN_2264011	GRAP	GRB2-related adaptor protein	0.00295715	0.0293439	-0.733309
ILMN_1799289	MRPL55	mitochondrial ribosomal protein L55	0.000892291	0.0138128	-0.734028
ILMN_2395856	TMEM218	transmembrane protein 218	0.00362737	0.0335675	-0.734484
ILMN_1790978	ATG7	ATG7 autophagy related 7 homolog (S. cerevisiae)	0.00577685	0.0450836	-0.737181
ILMN_1662383	ZRANB2	zinc finger, RAN-binding domain containing 2	6.81166e-05	0.00344517	-0.737542
ILMN_1654552	MRPS31	mitochondrial ribosomal protein S31	0.00492279	0.0409965	-0.738196
ILMN_1708414	GNL3L	guanine nucleotide binding protein-like 3 (nucleolar)-like	0.00335355	0.0317343	-0.74583
ILMN_1798957	C12orf47	chromosome 12 open reading frame 47	0.00403071	0.035885	-0.746325
ILMN_1717990	CALD1	caldesmon 1	0.00325972	0.031099	-0.746845
ILMN_2358914	SLC35C2	solute carrier family 35, member C2	0.00129375	0.0173893	-0.747123
ILMN_1723158	NOL1	NOP2 nucleolar protein homolog (yeast)	0.00236476	0.0252141	-0.747344
ILMN_1800390	ZNF511	zinc finger protein 511	0.00273857	0.027834	-0.747641
ILMN_1797793	BLVRB	biliverdin reductase B (flavin reductase (NADPH))	0.00293618	0.0292527	-0.75018
ILMN_1659027	SLC2A1	solute carrier family 2 (facilitated glucose transporter), member 1	0.0037466	0.0342818	-0.752105
ILMN_2336781	SOD2	superoxide dismutase 2, mitochondrial	0.00428967	0.0375772	-0.754649
ILMN_2050921	SNHG8	small nucleolar RNA host gene 8 (non-protein coding)	0.00529058	0.0428318	-0.754817
ILMN_1754220	SF3A2	splicing factor 3a, subunit 2, 66kDa	0.00286775	0.0287944	-0.755842
ILMN_1666503	DENND2A	DENN/MADD domain containing 2A	0.00265798	0.0272153	-0.759221
ILMN_1803317	C9orf114	chromosome 9 open reading frame 114	0.00261804	0.0269711	-0.759727
ILMN_1759084	INTS8	integrator complex subunit 8	0.000150706	0.0049884	-0.763911
ILMN_1757298	BTBD7	BTB (POZ) domain containing 7	0.000856447	0.0135075	-0.767707
ILMN_2387471	FLVCR2	feline leukemia virus subgroup C cellular receptor family, member 2	0.00065167	0.0115596	-0.768236
ILMN_2343097	NCALD	neurocalcin delta	0.00088027	0.0136809	-0.773795
ILMN_1703891	TBC1D9	TBC1 domain family, member 9 (with GRAM domain)	0.000696721	0.0119961	-0.774662
ILMN_2324574	GARNL1	Ral GTPase activating protein, alpha subunit 1 (catalytic)	0.00613269	0.0468039	-0.774941
ILMN_1768394	ARPC5	actin related protein 2/3 complex, subunit 5, 16kDa	0.00287188	0.0288023	-0.777918
ILMN_1664028	CENPB	centromere protein B, 80kDa	0.00628745	0.047552	-0.780629
ILMN_1664921	PPP6C	protein phosphatase 6, catalytic subunit	0.00228021	0.0246264	-0.781608
ILMN_2110167	POLR1E	polymerase (RNA) I polypeptide E, 53kDa	0.00136188	0.0179251	-0.781875
ILMN_1740900	BMP4	bone morphogenetic protein 4	0.00584207	0.0454582	-0.782342
ILMN_2128750	PTTG1IP	pituitary tumor-transforming 1 interacting protein	0.00154982	0.0193053	-0.782502
ILMN_2100815	TMEM9B	TMEM9 domain family, member B	0.00223574	0.0243813	-0.783496
ILMN_1804490	PRKRIP1	PRKR interacting protein 1 (IL11 inducible)	0.000351611	0.00806157	-0.787061
ILMN_1721128	TOMM34	translocase of outer mitochondrial membrane 34	0.000153978	0.00504687	-0.788088
ILMN_1676448	WDFY1	WD repeat and FYVE domain containing 1	0.00616634	0.0469843	-0.789389
ILMN_1759023	WFS1	Wolfram syndrome 1 (wolframin)	0.000256504	0.00676587	-0.792732
ILMN_2371984	SMAD5	SMAD family member 5	0.00248388	0.0259999	-0.79303
ILMN_1798204	IL21R	interleukin 21 receptor	0.00442454	0.038245	-0.793113
ILMN_1749591	ITGAL	integrin, alpha L (antigen CD11A (p180), lymphocyte function-associated antigen 1; alpha polypeptide)	0.000318783	0.00764168	-0.796211
ILMN_1660306	ITGA8	integrin, alpha 8	0.00171924	0.0205538	-0.797274
ILMN_1778032	SURF6	surfeit 6	0.0039223	0.0353304	-0.79848
ILMN_1707503	C1orf144	chromosome 1 open reading frame 144	5.09966e-05	0.00305303	-0.799129
ILMN_2096372	ALDH1A1	aldehyde dehydrogenase 1 family, member A1	0.00117247	0.0164232	-0.801007
ILMN_1776519	RAP1GAP	RAP1 GTPase activating protein	0.000791497	0.0129171	-0.801646
ILMN_1743770	SLC25A14	solute carrier family 25 (mitochondrial carrier, brain), member 14	0.000866408	0.0136097	-0.802031
ILMN_1710962	TMEM97	transmembrane protein 97	0.000430399	0.00896238	-0.802101
ILMN_1762312	FOXRED1	FAD-dependent oxidoreductase domain containing 1	0.000982321	0.0147116	-0.802584
ILMN_1752226	P2RY11	purinergic receptor P2Y, G-protein coupled, 11	0.000229123	0.00635586	-0.802721
ILMN_1696749	LMNA	lamin A/C	0.0013172	0.0175591	-0.803383
ILMN_1691111	SPATA2L	spermatogenesis associated 2-like	0.0007312	0.0123526	-0.805876
ILMN_1684964	ZNF212	zinc finger protein 212	9.24206e-05	0.00397968	-0.810006
ILMN_1669831	C6orf192	chromosome 6 open reading frame 192	0.00534225	0.0431127	-0.810714
ILMN_1694106	GPD1L	glycerol-3-phosphate dehydrogenase 1-like	0.001861	0.0217175	-0.811536
ILMN_1811574	MAPK8IP3	mitogen-activated protein kinase 8 interacting protein 3	0.0031296	0.030387	-0.812286
ILMN_1749403	TSPAN33	tetraspanin 33	0.00183204	0.0214942	-0.812465
ILMN_1764380	GLTP	glycolipid transfer protein	0.00177453	0.0210347	-0.81262
ILMN_2094313	ZDHHC1	zinc finger, DHHC-type containing 1	0.00100687	0.0149457	-0.812699
ILMN_1775542	FAIM3	Fas apoptotic inhibitory molecule 3	0.00299359	0.0295735	-0.81351
ILMN_1810712	ARHGEF12	Rho guanine nucleotide exchange factor (GEF) 12	0.00125391	0.0170743	-0.814541
ILMN_1785424	ABLIM1	actin binding LIM protein 1	0.00667485	0.049402	-0.818646
ILMN_1815057	PDGFRB	platelet-derived growth factor receptor, beta polypeptide	0.00212528	0.0235739	-0.819137
ILMN_2219134	RPS15	ribosomal protein S15	0.000341739	0.00794244	-0.820553
ILMN_1758672	FAM107B	family with sequence similarity 107, member B	0.00147862	0.0188073	-0.821771
ILMN_2363668	YIF1B	Yip1 interacting factor homolog B (S. cerevisiae)	0.00122935	0.0168914	-0.823449
ILMN_2390974	DNAJB2	DnaJ (Hsp40) homolog, subfamily B, member 2	0.00200759	0.0227385	-0.823721
ILMN_2313158	MBNL1	muscleblind-like (Drosophila)	0.00144212	0.0184636	-0.8262
ILMN_2065773	SCG5	secretogranin V (7B2 protein)	0.00204796	0.023029	-0.827976
ILMN_2405602	OSBPL1A	oxysterol binding protein-like 1A	0.00234463	0.0250629	-0.828309
ILMN_1749838	MZF1	myeloid zinc finger 1	0.00572792	0.0449424	-0.829606
ILMN_2404385	REPIN1	replication initiator 1	0.00315916	0.030533	-0.830392
ILMN_1724907	NUDT3	nudix (nucleoside diphosphate linked moiety X)-type motif 3	0.000367747	0.00825864	-0.830921
ILMN_1815039	C6orf153	ribosomal RNA processing 36 homolog (S. cerevisiae)	0.00137756	0.0180167	-0.831564
ILMN_1683755	SOX13	SRY (sex determining region Y)-box 13	0.00010321	0.00417609	-0.8323
ILMN_1708095	PANK2	pantothenate kinase 2	0.000915829	0.0140544	-0.832325
ILMN_2098325	C8orf33	chromosome 8 open reading frame 33	0.00405616	0.03606	-0.83505
ILMN_1687508	ALDH7A1	aldehyde dehydrogenase 7 family, member A1	0.00534855	0.043134	-0.836518
ILMN_1670609	ATOX1	ATX1 antioxidant protein 1 homolog (yeast)	0.00520043	0.0424204	-0.837913
ILMN_1770800	PODN	podocan	0.00155631	0.0193759	-0.838591
ILMN_1775486	SSPN	sarcospan (Kras oncogene-associated gene)	0.000953944	0.0144266	-0.838844
ILMN_1731107	CCDC92	coiled-coil domain containing 92	0.00244461	0.0256689	-0.841716
ILMN_2173004	RAB8B	RAB8B, member RAS oncogene family	0.00438254	0.0380079	-0.843643
ILMN_1802753	TSSC4	tumor suppressing subtransferable candidate 4	0.00349218	0.0326772	-0.845588
ILMN_1807206	DHRS1	dehydrogenase/reductase (SDR family) member 1	0.00245395	0.0257453	-0.845659
ILMN_1803110	SF3B3	splicing factor 3b, subunit 3, 130kDa	0.000303432	0.00744867	-0.845852
ILMN_1738712	GPR180	G protein-coupled receptor 180	0.000106936	0.00421518	-0.849042
ILMN_2366490	ZNF706	zinc finger protein 706	0.00292147	0.0292122	-0.849502
ILMN_1771057	XAB2	XPA binding protein 2	0.000477072	0.00948806	-0.850258
ILMN_2379835	SUMO1	SMT3 suppressor of mif two 3 homolog 1 (S. cerevisiae)	0.00201091	0.0227432	-0.851882
ILMN_1653319	MC1R	melanocortin 1 receptor (alpha melanocyte stimulating hormone receptor)	0.00165634	0.0201016	-0.856044
ILMN_1754529	SPG7	spastic paraplegia 7 (pure and complicated autosomal recessive)	0.003624	0.0335675	-0.856107
ILMN_1719202	ZNF174	zinc finger protein 174	0.00011335	0.00435162	-0.856504
ILMN_2103919	LRFN3	leucine rich repeat and fibronectin type III domain containing 3	4.23049e-07	0.000309548	-0.857205
ILMN_1811102	LRSAM1	leucine rich repeat and sterile alpha motif containing 1	0.00199816	0.0226877	-0.858053
ILMN_1699217	C1orf96	chromosome 1 open reading frame 96	0.00137258	0.0179853	-0.85861
ILMN_1752199	LHPP	phospholysine phosphohistidine inorganic pyrophosphate phosphatase	0.00133191	0.0176197	-0.859532
ILMN_2252309	DPP7	dipeptidyl-peptidase 7	0.00130013	0.0174448	-0.861126
ILMN_1801941	C1orf50	chromosome 1 open reading frame 50	1.88941e-05	0.00187525	-0.861537
ILMN_1809866	WDR74	WD repeat domain 74	0.000606158	0.0110018	-0.863658
ILMN_2327860	MAL	mal, T-cell differentiation protein	0.00359706	0.0333791	-0.864563
ILMN_2139943	RPS3A	ribosomal protein S3A	0.000621183	0.0111708	-0.865514
ILMN_1664010	ELF1	E74-like factor 1 (ets domain transcription factor)	4.86204e-05	0.00297533	-0.866718
ILMN_1810441	TRIM3	tripartite motif-containing 3	0.000383357	0.00837937	-0.867681
ILMN_1757914	C19orf56	chromosome 19 open reading frame 62	0.00103424	0.0151453	-0.867829
ILMN_2345353	LST1	leukocyte specific transcript 1	0.00013074	0.00464381	-0.869793
ILMN_1697694	ATP6AP1	ATPase, H+ transporting, lysosomal accessory protein 1	0.000147181	0.00492731	-0.871627
ILMN_1778457	IL18	interleukin 18 (interferon-gamma-inducing factor)	0.00013347	0.00467503	-0.872203
ILMN_1790534	MAP2K3	mitogen-activated protein kinase kinase 3	0.000905563	0.0139264	-0.877879
ILMN_2043615	C17orf90	chromosome 17 open reading frame 90	0.00241846	0.0254899	-0.878787
ILMN_2146372	KCTD6	potassium channel tetramerisation domain containing 6	0.00333386	0.0315862	-0.881169
ILMN_2363058	PAOX	polyamine oxidase (exo-N4-amino)	0.00314313	0.0304806	-0.881682
ILMN_1765371	LUC7L	LUC7-like (S. cerevisiae)	0.00449969	0.038582	-0.883657
ILMN_1733615	MTF2	metal response element binding transcription factor 2	0.00111376	0.0159182	-0.886175
ILMN_1782247	KAT2A	K(lysine) acetyltransferase 2A	0.000153112	0.00503961	-0.887932
ILMN_2135175	SNORD36A	small nucleolar RNA, C/D box 36A	0.00130364	0.0174588	-0.887935
ILMN_2201533	C17orf61	chromosome 17 open reading frame 61	0.0019818	0.0225881	-0.888297
ILMN_2041161	DENND4A	DENN/MADD domain containing 4A	0.000155822	0.005099	-0.891143
ILMN_1743034	KIF1B	kinesin family member 1B	0.000545929	0.0102996	-0.891485
ILMN_1718607	TSPAN4	tetraspanin 4	0.000424344	0.00890854	-0.893513
ILMN_1697793	SYNJ2BP	synaptojanin 2 binding protein	2.90483e-05	0.0023048	-0.895005
ILMN_1783852	CD164	CD164 molecule, sialomucin	0.00139708	0.0181643	-0.89567
ILMN_1690566	RASSF4	Ras association (RalGDS/AF-6) domain family member 4	0.000831371	0.0132163	-0.895982
ILMN_1705384	PPFIBP1	PTPRF interacting protein, binding protein 1 (liprin beta 1)	0.00073155	0.0123526	-0.898303
ILMN_2145280	DEF6	differentially expressed in FDCP 6 homolog (mouse)	0.00175797	0.020904	-0.898576
ILMN_2196078	SLAMF6	SLAM family member 6	0.000204924	0.00597347	-0.89895
ILMN_1676010	SP1	Sp1 transcription factor	0.00589447	0.0456891	-0.899017
ILMN_1718977	GADD45B	growth arrest and DNA-damage-inducible, beta	0.00149227	0.018879	-0.899136
ILMN_1725387	TMEM200A	transmembrane protein 200A	0.00667521	0.049402	-0.907287
ILMN_1745607	A2M	alpha-2-macroglobulin	0.00163474	0.0199709	-0.909741
ILMN_1731358	ZNF532	zinc finger protein 532	0.0020034	0.0227137	-0.910327
ILMN_2107184	SNRK	SNF related kinase	0.00217124	0.0239209	-0.911383
ILMN_1691466	YES1	v-yes-1 Yamaguchi sarcoma viral oncogene homolog 1	0.000382719	0.00837937	-0.911986
ILMN_1670420	METAP2	methionyl aminopeptidase 2	0.00557838	0.0442126	-0.912903
ILMN_2159322	SLK	STE20-like kinase	0.000810654	0.0130037	-0.913142
ILMN_2364828	OGT	O-linked N-acetylglucosamine (GlcNAc) transferase	0.0015334	0.019172	-0.91498
ILMN_1746137	ST7	suppression of tumorigenicity 7	0.00285456	0.0287144	-0.915315
ILMN_2411794	PTPRA	protein tyrosine phosphatase, receptor type, A	0.00152262	0.0190949	-0.915551
ILMN_1747673	RASL10A	RAS-like, family 10, member A	0.000521068	0.00999614	-0.917982
ILMN_1814971	TCF25	transcription factor 25 (basic helix-loop-helix)	1.77005e-05	0.00183779	-0.918225
ILMN_1727466	KCNMB4	potassium large conductance calcium-activated channel, subfamily M, beta member 4	0.00251418	0.0262017	-0.919524
ILMN_1797728	HMGCS1	3-hydroxy-3-methylglutaryl-CoA synthase 1 (soluble)	0.00264844	0.0271532	-0.920109
ILMN_2042595	PCM1	pericentriolar material 1	0.00161454	0.0197963	-0.921259
ILMN_1663605	RNF123	ring finger protein 123	2.43141e-05	0.00214513	-0.92552
ILMN_1812769	UBXN1	UBX domain protein 1	0.00189134	0.0219189	-0.925549
ILMN_1679555	TIMM23	translocase of inner mitochondrial membrane 23 homolog (yeast)	0.00136669	0.0179482	-0.925628
ILMN_2176450	CA3	carbonic anhydrase III, muscle specific	0.000715651	0.012179	-0.929402
ILMN_1676302	FAM113A	family with sequence similarity 113, member A	0.000584885	0.0107335	-0.931398
ILMN_1657893	TXNRD2	thioredoxin reductase 2	0.000453903	0.00919485	-0.932815
ILMN_1792679	ITGA5	integrin, alpha 5 (fibronectin receptor, alpha polypeptide)	0.000983395	0.0147183	-0.932987
ILMN_1705570	H2AFY2	H2A histone family, member Y2	0.00268672	0.0274258	-0.933521
ILMN_1790472	SLC25A28	solute carrier family 25, member 28	0.00036531	0.00822754	-0.935767
ILMN_1679045	SBDS	Shwachman-Bodian-Diamond syndrome	0.00540372	0.0434147	-0.936812
ILMN_1682165	NT5C2	5'-nucleotidase, cytosolic II	0.00262794	0.0270493	-0.937093
ILMN_1775744	MRPS16	mitochondrial ribosomal protein S16	0.00108185	0.0156047	-0.938198
ILMN_1711053	BBS5	Bardet-Biedl syndrome 5	0.00142301	0.0183265	-0.939671
ILMN_1675062	MYL9	myosin, light chain 9, regulatory	0.00255341	0.026503	-0.939989
ILMN_1714809	RPIA	ribose 5-phosphate isomerase A	0.00194414	0.0222779	-0.941512
ILMN_1755411	RBMS2	RNA binding motif, single stranded interacting protein 2	0.00178078	0.0210429	-0.944026
ILMN_2144426	HIST2H2AA3	histone cluster 2, H2aa3	0.000945213	0.0143667	-0.946466
ILMN_2121437	NCL	nucleolin	0.00104804	0.0152767	-0.947532
ILMN_1769520	UBE2L6	ubiquitin-conjugating enzyme E2L 6	0.00133156	0.0176197	-0.947916
ILMN_1798712	USP4	ubiquitin specific peptidase 4 (proto-oncogene)	0.000200171	0.00588083	-0.949486
ILMN_2176955	CUL5	cullin 5	7.47215e-06	0.0012349	-0.949516
ILMN_1730940	KLHDC3	kelch domain containing 3	0.00444445	0.0383303	-0.949804
ILMN_1728163	CTDSP1	CTD (carboxy-terminal domain, RNA polymerase II, polypeptide A) small phosphatase 1	0.0047885	0.0401919	-0.951751
ILMN_2276290	RALGPS2	Ral GEF with PH domain and SH3 binding motif 2	0.00178935	0.0210911	-0.951914
ILMN_1707810	RPS5	ribosomal protein S5	0.00604001	0.0463225	-0.952704
ILMN_1711270	SFRS14	SURP and G patch domain containing 2	6.47932e-05	0.00341554	-0.953215
ILMN_1808939	RPS6	ribosomal protein S6	0.00124308	0.0169905	-0.953958
ILMN_1727458	HDAC1	histone deacetylase 1	0.00463849	0.0394121	-0.954538
ILMN_2414007	NME2	non-metastatic cells 2, protein (NM23B) expressed in	0.00373111	0.0341904	-0.955224
ILMN_2082324	SLC36A4	solute carrier family 36 (proton/amino acid symporter), member 4	0.00190745	0.022073	-0.955408
ILMN_1656413	ZMPSTE24	zinc metallopeptidase (STE24 homolog, S. cerevisiae)	0.00365922	0.0337425	-0.955469
ILMN_1658437	SFXN4	sideroflexin 4	2.23619e-05	0.00208943	-0.956944
ILMN_2101375	CCDC77	coiled-coil domain containing 77	0.00418515	0.0369048	-0.957385
ILMN_1675788	ZNF175	zinc finger protein 175	0.00473993	0.0399823	-0.957519
ILMN_1781479	SUV39H1	suppressor of variegation 3-9 homolog 1 (Drosophila)	0.00192492	0.0222204	-0.958487
ILMN_1801697	C19orf46	chromosome 19 open reading frame 48	0.000157599	0.00510848	-0.959424
ILMN_1666208	C14orf106	chromosome 14 open reading frame 106	0.00408241	0.0362078	-0.95962
ILMN_1815719	PLCG2	phospholipase C, gamma 2 (phosphatidylinositol-specific)	0.00339422	0.0319949	-0.960743
ILMN_1698463	ILF3	interleukin enhancer binding factor 3, 90kDa	0.000359514	0.00815965	-0.961024
ILMN_2355831	FHL2	four and a half LIM domains 2	0.00303715	0.0297945	-0.96184
ILMN_1806408	ACADVL	acyl-CoA dehydrogenase, very long chain	0.000351054	0.00806157	-0.961962
ILMN_1718766	MT1F	metallothionein 1F	0.00401046	0.0357605	-0.962438
ILMN_1785107	NXT2	nuclear transport factor 2-like export factor 2	0.00187973	0.0218384	-0.962862
ILMN_1695706	H3F3B	H3 histone, family 3B (H3.3B)	0.000307587	0.00751482	-0.963263
ILMN_1742324	C1orf9	chromosome 1 open reading frame 9	0.00109462	0.0157405	-0.964862
ILMN_2335718	HNRNPAB	heterogeneous nuclear ribonucleoprotein A/B	0.000777278	0.0128008	-0.965038
ILMN_1751400	SKAP1	src kinase associated phosphoprotein 1	0.00124582	0.017018	-0.966285
ILMN_2108709	ANKRD11	ankyrin repeat domain 11	0.00165699	0.0201016	-0.966799
ILMN_2415144	SP110	SP110 nuclear body protein	3.86039e-05	0.00263296	-0.967893
ILMN_1777528	NCBP1	nuclear cap binding protein subunit 1, 80kDa	0.000968263	0.0145732	-0.969015
ILMN_1662340	ZNF358	zinc finger protein 358	0.00016835	0.00532457	-0.969315
ILMN_1736234	C1orf77	chromosome 1 open reading frame 77	0.000496478	0.00971755	-0.973035
ILMN_1776640	MPL	myeloproliferative leukemia virus oncogene	3.9731e-05	0.00264488	-0.97488
ILMN_2279635	EIF4G2	eukaryotic translation initiation factor 4 gamma, 2	1.90178e-05	0.00187525	-0.975547
ILMN_1694589	PAQR8	progestin and adipoQ receptor family member VIII	0.00011528	0.00436352	-0.978768
ILMN_1773073	PHYH	phytanoyl-CoA 2-hydroxylase	0.000623791	0.0112006	-0.979191
ILMN_1792489	ARPC2	actin related protein 2/3 complex, subunit 2, 34kDa	0.00120327	0.0166893	-0.982752
ILMN_2057981	FAM164A	family with sequence similarity 164, member A	0.00132652	0.0175955	-0.984028
ILMN_1667222	MTX1	metaxin 1	7.07845e-05	0.00349015	-0.984474
ILMN_1680937	HIST1H2BC	histone cluster 1, H2bc	0.00104074	0.0152081	-0.98626
ILMN_1667295	VASN	vasorin	0.00521177	0.0424583	-0.986274
ILMN_1815707	CALML4	calmodulin-like 4	0.00615917	0.0469449	-0.986387
ILMN_1745447	HIVEP2	human immunodeficiency virus type I enhancer binding protein 2	0.00230416	0.0247705	-0.98639
ILMN_1702763	ZMYM1	zinc finger, MYM-type 1	0.00498763	0.0413457	-0.987768
ILMN_1734766	C6orf182	chromosome 6 open reading frame 182	0.0016867	0.0203097	-0.988069
ILMN_1760667	POLR3GL	polymerase (RNA) III (DNA directed) polypeptide G (32kD)-like	0.000547294	0.0102998	-0.989359
ILMN_1653553	C14orf80	chromosome 14 open reading frame 80	0.000110649	0.0042921	-0.99005
ILMN_2129886	ABCA8	ATP-binding cassette, sub-family A (ABC1), member 8	0.00135383	0.0178392	-0.990916
ILMN_1758674	TMEM93	transmembrane protein 93	0.000244199	0.00657208	-0.99104
ILMN_1721093	TAF10	TAF10 RNA polymerase II, TATA box binding protein (TBP)-associated factor, 30kDa	0.00327334	0.0311891	-0.992191
ILMN_1688041	TMEM53	transmembrane protein 53	0.00602324	0.0462435	-0.992552
ILMN_1682774	C13orf27	chromosome 13 open reading frame 27	0.00340673	0.0320823	-0.993371
ILMN_1757384	RAN	RAN, member RAS oncogene family	0.00436671	0.0379548	-0.995458
ILMN_1727479	TPRG1L	tumor protein p63 regulated 1-like	0.00067051	0.0117605	-0.996156
ILMN_1733415	MFAP5	microfibrillar associated protein 5	0.0045087	0.0386028	-0.997326
ILMN_2128428	DAB2	disabled homolog 2, mitogen-responsive phosphoprotein (Drosophila)	0.0013178	0.0175591	-1.00134
ILMN_1758728	FANCG	Fanconi anemia, complementation group G	0.00308928	0.0300823	-1.00196
ILMN_1811238	ALPK2	alpha-kinase 2	0.00159562	0.0196773	-1.00213
ILMN_1763763	RIPK3	receptor-interacting serine-threonine kinase 3	0.00117429	0.0164232	-1.00422
ILMN_1716384	ATL2	atlastin GTPase 2	7.60277e-05	0.00357639	-1.00584
ILMN_2388605	ACTR2	ARP2 actin-related protein 2 homolog (yeast)	0.00388616	0.0351446	-1.00764
ILMN_1801236	SPG20	spastic paraplegia 20 (Troyer syndrome)	0.00142693	0.0183459	-1.0084
ILMN_1703196	PRKD3	protein kinase D3	0.00284637	0.0286689	-1.00894
ILMN_2399363	CLEC4A	C-type lectin domain family 4, member A	0.000233639	0.00643549	-1.01007
ILMN_2112829	ANKAR	ankyrin and armadillo repeat containing	0.00246154	0.025812	-1.01017
ILMN_1700183	APLNR	apelin receptor	0.000768424	0.0127085	-1.01114
ILMN_1702933	ADM2	adrenomedullin 2	0.00440423	0.0381115	-1.01129
ILMN_2149766	APPBP2	amyloid beta precursor protein (cytoplasmic tail) binding protein 2	0.000368914	0.00826114	-1.01139
ILMN_1743032	CTSS	cathepsin S	0.00224679	0.0244562	-1.01143
ILMN_1701655	SLC24A6	solute carrier family 24 (sodium/potassium/calcium exchanger), member 6	0.000686465	0.0119095	-1.0131
ILMN_1702265	HDHD2	haloacid dehalogenase-like hydrolase domain containing 2	0.000537964	0.0102475	-1.01407
ILMN_1774596	BSCL2	Berardinelli-Seip congenital lipodystrophy 2 (seipin)	0.00105054	0.0152846	-1.01491
ILMN_1771149	MRPL19	mitochondrial ribosomal protein L19	0.00274278	0.0278647	-1.01665
ILMN_1762003	SEC62	SEC62 homolog (S. cerevisiae)	0.00294492	0.0292845	-1.0167
ILMN_2038777	ACTB	actin, beta	0.000554151	0.0103814	-1.01705
ILMN_2210753	XLKD1	lymphatic vessel endothelial hyaluronan receptor 1	0.00528215	0.0427896	-1.01921
ILMN_1734254	ZNF770	zinc finger protein 770	0.00124998	0.0170649	-1.01943
ILMN_1678998	LRRC14	leucine rich repeat containing 14	0.00170715	0.0204614	-1.02114
ILMN_1732216	NARS	asparaginyl-tRNA synthetase	0.00471397	0.0398623	-1.02265
ILMN_2133100	LPIN2	lipin 2	0.0044654	0.0384424	-1.02274
ILMN_1758412	COPS7A	COP9 constitutive photomorphogenic homolog subunit 7A (Arabidopsis)	6.84178e-07	0.000364916	-1.02575
ILMN_1794643	ZGPAT	zinc finger, CCCH-type with G patch domain	0.000683002	0.0118907	-1.02641
ILMN_1814856	C9orf7	chromosome 9 open reading frame 7	0.00324982	0.031072	-1.02671
ILMN_2215194	GCLC	glutamate-cysteine ligase, catalytic subunit	0.00184648	0.0215997	-1.02691
ILMN_1719224	C17orf45	non-protein coding RNA 188	0.00463423	0.0393901	-1.02693
ILMN_1798163	UPF3B	UPF3 regulator of nonsense transcripts homolog B (yeast)	0.00620621	0.0471503	-1.02796
ILMN_1757781	SAP30L	SAP30-like	0.00085108	0.0134318	-1.02864
ILMN_1657627	CBFA2T3	core-binding factor, runt domain, alpha subunit 2; translocated to, 3	0.000380197	0.00835437	-1.02903
ILMN_2388070	TMEM44	transmembrane protein 44	0.00654057	0.0486819	-1.02906
ILMN_1684461	CADPS2	Ca++-dependent secretion activator 2	0.00629521	0.0475647	-1.02957
ILMN_1752589	TMEM183A	transmembrane protein 183A	0.000798007	0.0129603	-1.0303
ILMN_1791388	ZNF787	zinc finger protein 787	0.00104971	0.015284	-1.03069
ILMN_1689445	POLR2H	polymerase (RNA) II (DNA directed) polypeptide H	0.0011527	0.0162667	-1.0314
ILMN_1657749	CYP27C1	cytochrome P450, family 27, subfamily C, polypeptide 1	0.00542684	0.043526	-1.03201
ILMN_2099528	BTLA	B and T lymphocyte associated	0.00605153	0.0463654	-1.03209
ILMN_2402936	H3F3AP4	H3 histone, family 3A, pseudogene 4	0.00133067	0.0176197	-1.03679
ILMN_2175465	C15orf15	ribosomal L24 domain containing 1	0.00518747	0.0423851	-1.03693
ILMN_2051519	RPL37A	ribosomal protein L37a	1.03332e-05	0.0013803	-1.03853
ILMN_1751431	WIBG	within bgcn homolog (Drosophila)	0.00521452	0.0424616	-1.03891
ILMN_1809010	PSMC3	proteasome (prosome, macropain) 26S subunit, ATPase, 3	0.000412558	0.00877779	-1.04018
ILMN_1727740	SYNCRIP	synaptotagmin binding, cytoplasmic RNA interacting protein	0.00482452	0.0404075	-1.04026
ILMN_1773751	HRAS	v-Ha-ras Harvey rat sarcoma viral oncogene homolog	0.000383834	0.00837937	-1.0417
ILMN_1662328	CNNM3	cyclin M3	0.00169931	0.0204013	-1.04181
ILMN_1700915	BMI1	BMI1 polycomb ring finger oncogene	0.00237429	0.0252469	-1.04201
ILMN_1768754	PILRB	paired immunoglobin-like type 2 receptor beta	1.90011e-05	0.00187525	-1.04235
ILMN_1725644	UBE2D2	ubiquitin-conjugating enzyme E2D 2 (UBC4/5 homolog, yeast)	0.00395599	0.0355239	-1.04331
ILMN_2371964	MRPS12	mitochondrial ribosomal protein S12	0.000546933	0.0102998	-1.04392
ILMN_2373556	SPAST	spastin	0.00132688	0.0175955	-1.04507
ILMN_1745152	UQCC	ubiquinol-cytochrome c reductase complex chaperone	0.00251433	0.0262017	-1.0454
ILMN_1743131	TOX4	TOX high mobility group box family member 4	0.00133575	0.0176505	-1.04591
ILMN_2338963	SLC29A1	solute carrier family 29 (nucleoside transporters), member 1	0.00217384	0.0239209	-1.04667
ILMN_1679401	TRPM4	transient receptor potential cation channel, subfamily M, member 4	0.00128066	0.017278	-1.04687
ILMN_1675106	YIPF2	Yip1 domain family, member 2	0.00445974	0.0384078	-1.04704
ILMN_1662198	RANGAP1	Ran GTPase activating protein 1	0.00203195	0.0229149	-1.04718
ILMN_2181060	CKAP2	cytoskeleton associated protein 2	0.0028253	0.0284812	-1.04744
ILMN_1775814	GHR	growth hormone receptor	0.00454065	0.0388197	-1.0486
ILMN_1786034	GPRC5B	G protein-coupled receptor, family C, group 5, member B	0.00640044	0.0480317	-1.04899
ILMN_1738075	CMIP	c-Maf inducing protein	0.00236909	0.025234	-1.049
ILMN_1720595	MDGA1	MAM domain containing glycosylphosphatidylinositol anchor 1	0.00372661	0.0341625	-1.04915
ILMN_1802252	GAPDH	glyceraldehyde-3-phosphate dehydrogenase	0.000187167	0.00564581	-1.04947
ILMN_2090802	TMEM79	transmembrane protein 79	0.000123497	0.00454266	-1.04996
ILMN_1651254	LPP	LIM domain containing preferred translocation partner in lipoma	0.00146204	0.0186778	-1.05114
ILMN_2104784	FKBP3	FK506 binding protein 3, 25kDa	7.6445e-05	0.00358086	-1.0522
ILMN_1753010	PET112L	PET112-like (yeast)	8.56177e-05	0.00382675	-1.0535
ILMN_2124187	TSC22D2	TSC22 domain family, member 2	3.80917e-05	0.00263296	-1.05384
ILMN_1720059	HMBOX1	homeobox containing 1	0.00461585	0.0392766	-1.05579
ILMN_1754303	RPL30	ribosomal protein L30	0.00346646	0.0325014	-1.05615
ILMN_1771627	ZMIZ1	zinc finger, MIZ-type containing 1	0.000186715	0.00563941	-1.0565
ILMN_1785179	UBE2G2	ubiquitin-conjugating enzyme E2G 2 (UBC7 homolog, yeast)	0.00012523	0.00458486	-1.05657
ILMN_2103014	CCDC104	coiled-coil domain containing 104	0.0062799	0.0475256	-1.05765
ILMN_1694213	PLEKHO1	pleckstrin homology domain containing, family O member 1	0.000251556	0.00668575	-1.0578
ILMN_1777740	C8orf55	chromosome 8 open reading frame 55	0.000270305	0.00699958	-1.05889
ILMN_1762993	PIGV	phosphatidylinositol glycan anchor biosynthesis, class V	0.00396669	0.0355442	-1.06045
ILMN_1788468	ARGLU1	arginine and glutamate rich 1	0.00205053	0.0230358	-1.06131
ILMN_1738675	PTPN6	protein tyrosine phosphatase, non-receptor type 6	0.00119891	0.0166683	-1.06166
ILMN_1660498	RPS27	ribosomal protein S27	6.30719e-06	0.00115305	-1.06447
ILMN_1774589	IQCC	IQ motif containing C	0.00587868	0.0456371	-1.06487
ILMN_2068435	ZNF700	zinc finger protein 700	0.000792089	0.0129178	-1.06507
ILMN_2270900	ZNF197	zinc finger protein 197	0.00198439	0.0225983	-1.06557
ILMN_1683096	ASB1	ankyrin repeat and SOCS box-containing 1	0.00179256	0.0211078	-1.06602
ILMN_1677043	AKR7A2	aldo-keto reductase family 7, member A2 (aflatoxin aldehyde reductase)	0.0002643	0.00689176	-1.06661
ILMN_1767142	ZNF280D	zinc finger protein 280D	0.000563103	0.0104748	-1.06731
ILMN_1745573	TTC13	tetratricopeptide repeat domain 13	0.00109192	0.0157114	-1.06963
ILMN_1784410	UBP1	upstream binding protein 1 (LBP-1a)	0.00240279	0.0254118	-1.06976
ILMN_1699856	RALGDS	ral guanine nucleotide dissociation stimulator	1.94985e-05	0.001891	-1.07002
ILMN_1761560	PHF13	PHD finger protein 13	0.00205909	0.023074	-1.0702
ILMN_1669888	CSTA	cystatin A (stefin A)	0.00288108	0.0288698	-1.07048
ILMN_1674009	TKTL1	transketolase-like 1	0.00308655	0.0300823	-1.07059
ILMN_1759954	PTMA	prothymosin, alpha	0.00293674	0.0292527	-1.07068
ILMN_1801633	C20orf52	reactive oxygen species modulator 1	0.00460131	0.039167	-1.07084
ILMN_1799320	C9orf37	chromosome 9 open reading frame 37	0.000516739	0.00994002	-1.07112
ILMN_1723480	BST2	bone marrow stromal cell antigen 2	0.00507908	0.0418378	-1.07269
ILMN_2312709	LCMT1	leucine carboxyl methyltransferase 1	0.00364579	0.0336981	-1.07486
ILMN_1757467	H1F0	H1 histone family, member 0	0.000109233	0.00426534	-1.077
ILMN_1766010	YARS	tyrosyl-tRNA synthetase	0.00493226	0.0410394	-1.07748
ILMN_1749081	AUTS2	autism susceptibility candidate 2	0.00393392	0.0353856	-1.07754
ILMN_1768913	TSN	translin	0.000879854	0.0136809	-1.0787
ILMN_1773117	BCOR	BCL6 corepressor	0.00263143	0.0270734	-1.07894
ILMN_1775008	NCAPD2	non-SMC condensin I complex, subunit D2	8.58417e-05	0.00382675	-1.07924
ILMN_1774334	HIGD2A	HIG1 hypoxia inducible domain family, member 2A	0.00152332	0.0190949	-1.0795
ILMN_1666690	ACRC	acidic repeat containing	0.00186796	0.0217669	-1.08069
ILMN_2207533	RPS17	ribosomal protein S17	0.000131239	0.00464381	-1.08091
ILMN_1673305	RHOC	ras homolog gene family, member C	0.000326428	0.0077615	-1.0818
ILMN_1715715	CEBPA	CCAAT/enhancer binding protein (C/EBP), alpha	0.00443858	0.0382958	-1.08181
ILMN_1757877	HCFC1R1	host cell factor C1 regulator 1 (XPO1 dependent)	1.72989e-05	0.00181506	-1.08296
ILMN_1690320	TTC23	tetratricopeptide repeat domain 23	0.00011343	0.00435162	-1.08343
ILMN_1743933	TSHZ3	teashirt zinc finger homeobox 3	0.00324276	0.0310617	-1.08371
ILMN_1797731	MS4A6A	membrane-spanning 4-domains, subfamily A, member 6A	0.00101265	0.015003	-1.08411
ILMN_1715718	ZNF784	zinc finger protein 784	0.0019347	0.0222779	-1.0845
ILMN_1659240	MTMR14	myotubularin related protein 14	0.00357481	0.0332252	-1.08482
ILMN_1696463	SPI1	spleen focus forming virus (SFFV) proviral integration oncogene spi1	0.00462182	0.0393132	-1.08516
ILMN_1788062	SH3GL1	SH3-domain GRB2-like 1	0.00189024	0.021917	-1.08552
ILMN_1692276	GGPS1	geranylgeranyl diphosphate synthase 1	0.000685109	0.0119095	-1.08596
ILMN_2323007	CDH26	cadherin 26	0.00530208	0.0428623	-1.08678
ILMN_1757845	SPIRE1	spire homolog 1 (Drosophila)	0.0047546	0.0400362	-1.08767
ILMN_2395373	GABBR1	gamma-aminobutyric acid (GABA) B receptor, 1	0.00219434	0.024109	-1.0892
ILMN_1726873	TPCN2	two pore segment channel 2	2.73965e-05	0.0022525	-1.08972
ILMN_1815190	METTL1	methyltransferase like 1	0.0021274	0.0235739	-1.09015
ILMN_1763460	NHP2L1	NHP2 non-histone chromosome protein 2-like 1 (S. cerevisiae)	0.0022835	0.0246501	-1.09062
ILMN_1736577	ZNF688	zinc finger protein 688	0.000472115	0.00943374	-1.09071
ILMN_1685796	CSDE1	cold shock domain containing E1, RNA-binding	0.00298641	0.0295575	-1.09282
ILMN_1727041	EWSR1	Ewing sarcoma breakpoint region 1	0.00316155	0.030533	-1.09323
ILMN_2176037	GNA13	guanine nucleotide binding protein (G protein), alpha 13	0.00395769	0.0355239	-1.09327
ILMN_2150802	FLYWCH1	FLYWCH-type zinc finger 1	0.00154572	0.0192644	-1.0933
ILMN_1676515	IMPDH1	IMP (inosine 5'-monophosphate) dehydrogenase 1	4.26389e-06	0.000957925	-1.0935
ILMN_1788180	RAB13	RAB13, member RAS oncogene family	0.00662554	0.0491429	-1.09359
ILMN_2058141	HMGN2	high-mobility group nucleosomal binding domain 2	0.00340363	0.032066	-1.09443
ILMN_1688098	TBC1D4	TBC1 domain family, member 4	0.00386497	0.0350411	-1.0947
ILMN_2255133	BCL11A	B-cell CLL/lymphoma 11A (zinc finger protein)	0.00328657	0.0312771	-1.09649
ILMN_1688580	CAMP	cathelicidin antimicrobial peptide	0.00491311	0.0409427	-1.09837
ILMN_1656285	METTL7A	methyltransferase like 7A	0.00136669	0.0179482	-1.09845
ILMN_1806122	CHD8	chromodomain helicase DNA binding protein 8	0.0054363	0.0435774	-1.09944
ILMN_1753607	PNO1	partner of NOB1 homolog (S. cerevisiae)	0.00178851	0.0210911	-1.09967
ILMN_1812618	CENTD3	ArfGAP with RhoGAP domain, ankyrin repeat and PH domain 3	0.00311345	0.0302553	-1.1006
ILMN_1652512	C2CD2	C2 calcium-dependent domain containing 2	0.00264565	0.0271364	-1.1023
ILMN_1714848	ZNF354A	zinc finger protein 354A	0.00116137	0.0163596	-1.10317
ILMN_1726769	CNDP2	CNDP dipeptidase 2 (metallopeptidase M20 family)	0.00203539	0.0229424	-1.10356
ILMN_1683204	GMEB2	glucocorticoid modulatory element binding protein 2	0.00643728	0.0481728	-1.10419
ILMN_2380494	ANXA11	annexin A11	0.00299103	0.0295735	-1.10526
ILMN_1704793	MYPOP	Myb-related transcription factor, partner of profilin	0.00333872	0.0316195	-1.10559
ILMN_2204876	FLVCR2	feline leukemia virus subgroup C cellular receptor family, member 2	0.00399222	0.0357048	-1.1062
ILMN_1689123	CCNK	cyclin K	0.000687634	0.0119095	-1.10622
ILMN_2368576	UBA52	ubiquitin A-52 residue ribosomal protein fusion product 1	7.58603e-05	0.00357639	-1.10792
ILMN_1779040	INO80B	INO80 complex subunit B	0.00165623	0.0201016	-1.10819
ILMN_1719993	GOLGA6L9	golgin A6 family-like 9	0.000508276	0.00988254	-1.10915
ILMN_1669433	KIAA0913	KIAA0913	0.0051141	0.0420672	-1.10916
ILMN_1654151	COX6C	cytochrome c oxidase subunit VIc	0.000345933	0.00798265	-1.10958
ILMN_1785252	SLC26A6	solute carrier family 26, member 6	5.93492e-05	0.00331621	-1.10999
ILMN_1692267	B4GALT3	UDP-Gal:betaGlcNAc beta 1,4- galactosyltransferase, polypeptide 3	0.000105449	0.00419347	-1.11022
ILMN_1657744	C15orf17	chromosome 15 open reading frame 17	0.00525114	0.0426267	-1.11127
ILMN_1734814	HSPA4	heat shock 70kDa protein 4	0.00160469	0.0196857	-1.11147
ILMN_1685112	CCDC44	translational activator of mitochondrially encoded cytochrome c oxidase I	0.000453073	0.00919485	-1.11209
ILMN_1815639	GIGYF1	GRB10 interacting GYF protein 1	0.0063972	0.0480317	-1.11228
ILMN_1713178	FAM116A	family with sequence similarity 116, member A	8.40267e-05	0.00379949	-1.11257
ILMN_1724194	NPEPL1	aminopeptidase-like 1	0.000430833	0.00896346	-1.11459
ILMN_1733248	NRBP2	nuclear receptor binding protein 2	0.000476392	0.00948806	-1.11476
ILMN_1815010	RNF141	ring finger protein 141	0.00120026	0.0166771	-1.11677
ILMN_1744968	KCNAB1	potassium voltage-gated channel, shaker-related subfamily, beta member 1	0.000744864	0.0125218	-1.11697
ILMN_1773901	STX12	syntaxin 12	0.00065806	0.0116058	-1.11705
ILMN_2065299	EDEM3	ER degradation enhancer, mannosidase alpha-like 3	0.00193615	0.0222779	-1.11706
ILMN_2116556	LSM5	LSM5 homolog, U6 small nuclear RNA associated (S. cerevisiae)	0.00382566	0.0347852	-1.11743
ILMN_1682775	EDN1	endothelin 1	0.000889382	0.013786	-1.11837
ILMN_2245814	RUFY2	RUN and FYVE domain containing 2	0.00559985	0.0443501	-1.11841
ILMN_2362902	RASSF5	Ras association (RalGDS/AF-6) domain family member 5	0.00495649	0.0411457	-1.1199
ILMN_2279873	WHDC1	WAS protein homolog associated with actin, golgi membranes and microtubules	0.00418777	0.0369052	-1.12021
ILMN_2153787	ARRDC5	arrestin domain containing 5	0.00241708	0.0254899	-1.12095
ILMN_1669508	PAF1	Paf1, RNA polymerase II associated factor, homolog (S. cerevisiae)	0.00400549	0.0357605	-1.12107
ILMN_1773063	OSBPL1A	oxysterol binding protein-like 1A	0.000293839	0.00733694	-1.12138
ILMN_2084391	RAD18	RAD18 homolog (S. cerevisiae)	0.00549389	0.0437647	-1.1214
ILMN_2073969	ABHD13	abhydrolase domain containing 13	0.00212553	0.0235739	-1.12144
ILMN_1815107	MATR3	matrin 3	0.000612566	0.0110753	-1.12243
ILMN_1748894	GTPBP3	GTP binding protein 3 (mitochondrial)	0.00561738	0.0444333	-1.12243
ILMN_1746856	RAB21	RAB21, member RAS oncogene family	0.00212647	0.0235739	-1.12305
ILMN_1796179	HIST1H2BK	histone cluster 1, H2bk	0.00139858	0.0181643	-1.12314
ILMN_2375418	DPH2	DPH2 homolog (S. cerevisiae)	0.00014575	0.00490575	-1.12318
ILMN_1721703	PNN	pinin, desmosome associated protein	0.00332945	0.0315615	-1.12324
ILMN_2143487	TAF1B	TATA box binding protein (TBP)-associated factor, RNA polymerase I, B, 63kDa	0.00222135	0.024292	-1.12372
ILMN_2216637	STK32B	serine/threonine kinase 32B	0.00114459	0.0161982	-1.12472
ILMN_1688702	PJA2	praja ring finger 2	0.00171811	0.0205508	-1.12543
ILMN_1787256	HCN3	hyperpolarization activated cyclic nucleotide-gated potassium channel 3	0.00148448	0.0188211	-1.12645
ILMN_1746704	TRIM8	tripartite motif-containing 8	0.00599102	0.046094	-1.12752
ILMN_2183610	SERAC1	serine active site containing 1	0.000284689	0.00725524	-1.12785
ILMN_1794782	ABCG1	ATP-binding cassette, sub-family G (WHITE), member 1	0.00474438	0.0399823	-1.12802
ILMN_1734542	OVGP1	oviductal glycoprotein 1, 120kDa	0.00116792	0.0163928	-1.13039
ILMN_2402272	TCEAL8	transcription elongation factor A (SII)-like 8	0.00647297	0.0482723	-1.13215
ILMN_2362368	U2AF1	U2 small nuclear RNA auxiliary factor 1	0.00619338	0.0470986	-1.13242
ILMN_1680390	GCNT2	glucosaminyl (N-acetyl) transferase 2, I-branching enzyme (I blood group)	0.0022495	0.024463	-1.1334
ILMN_1670801	MTR	5-methyltetrahydrofolate-homocysteine methyltransferase	0.000115034	0.00436352	-1.13368
ILMN_1744068	ELP3	elongation protein 3 homolog (S. cerevisiae)	0.00321325	0.0308671	-1.13413
ILMN_2405233	FAM133B	family with sequence similarity 133, member B	0.000633936	0.0113393	-1.13442
ILMN_1811392	HMHA1	histocompatibility (minor) HA-1	0.00530133	0.0428623	-1.13463
ILMN_2135991	C16orf69	transmembrane protein 188	0.00123585	0.0169214	-1.13556
ILMN_1688220	SYNPO2	synaptopodin 2	0.00369908	0.0339898	-1.13858
ILMN_2043452	FANCE	Fanconi anemia, complementation group E	0.00130991	0.0175062	-1.1386
ILMN_2390586	SP100	SP100 nuclear antigen	0.00521964	0.0424627	-1.13884
ILMN_2411282	QSOX1	quiescin Q6 sulfhydryl oxidase 1	0.00242182	0.025498	-1.13916
ILMN_1808163	C11orf24	chromosome 11 open reading frame 24	0.00436577	0.0379548	-1.14033
ILMN_1701911	C5orf20	chromosome 5 open reading frame 20	0.00487667	0.0407135	-1.1407
ILMN_1688534	EIF2B5	eukaryotic translation initiation factor 2B, subunit 5 epsilon, 82kDa	0.000996579	0.0148211	-1.14134
ILMN_2109156	RANBP1	RAN binding protein 1	7.01624e-05	0.00349015	-1.14165
ILMN_1654890	LENG8	leukocyte receptor cluster (LRC) member 8	0.00141814	0.0182862	-1.14174
ILMN_2285141	USP48	ubiquitin specific peptidase 48	0.00200561	0.022727	-1.14176
ILMN_1774077	GBP2	guanylate binding protein 2, interferon-inducible	0.00177932	0.0210363	-1.142
ILMN_1674236	HSPB1	heat shock 27kDa protein 1	0.00200347	0.0227137	-1.14246
ILMN_2230016	HIGD1A	HIG1 hypoxia inducible domain family, member 1A	0.0056342	0.0444944	-1.143
ILMN_2269136	AGAP3	ArfGAP with GTPase domain, ankyrin repeat and PH domain 3	3.60685e-05	0.00259649	-1.14326
ILMN_1670096	NRBP1	nuclear receptor binding protein 1	0.00430603	0.0376084	-1.14374
ILMN_1784602	CDKN1A	cyclin-dependent kinase inhibitor 1A (p21, Cip1)	0.000438998	0.00907701	-1.14416
ILMN_1721876	TIMP2	TIMP metallopeptidase inhibitor 2	0.00317567	0.0306316	-1.14538
ILMN_2354391	EGLN2	egl nine homolog 2 (C. elegans)	0.000219269	0.00620723	-1.14616
ILMN_1653612	KCTD9	potassium channel tetramerisation domain containing 9	0.00324876	0.031072	-1.14764
ILMN_2259119	PRMT2	protein arginine methyltransferase 2	0.000253922	0.00673339	-1.14782
ILMN_1676058	MAGOHB	mago-nashi homolog B (Drosophila)	0.00577857	0.0450836	-1.14805
ILMN_1740265	ACOT7	acyl-CoA thioesterase 7	0.00158558	0.0196257	-1.14825
ILMN_1808566	TMEM180	transmembrane protein 180	0.00379211	0.0345693	-1.14873
ILMN_1716272	KBTBD8	kelch repeat and BTB (POZ) domain containing 8	0.0004541	0.00919485	-1.14886
ILMN_1745994	GAS7	growth arrest-specific 7	0.00429442	0.0375772	-1.14889
ILMN_1709814	NMRAL1	NmrA-like family domain containing 1	0.000261274	0.0068385	-1.14929
ILMN_1752579	ATP6V0A1	ATPase, H+ transporting, lysosomal V0 subunit a1	0.00222095	0.024292	-1.1505
ILMN_2089175	SYAP1	synapse associated protein 1	0.00223124	0.0243435	-1.1513
ILMN_2246894	EDF1	endothelial differentiation-related factor 1	0.00567805	0.0446707	-1.15191
ILMN_1728132	LDHB	lactate dehydrogenase B	0.00447331	0.0384681	-1.152
ILMN_1810922	PCNT	pericentrin	0.00565988	0.0446174	-1.15208
ILMN_2168866	C6orf62	chromosome 6 open reading frame 62	0.00116332	0.0163772	-1.15214
ILMN_1677534	SCAP	SREBF chaperone	0.0011901	0.016585	-1.15261
ILMN_1711886	ALG3	asparagine-linked glycosylation 3, alpha-1,3- mannosyltransferase homolog (S. cerevisiae)	0.000182706	0.00556559	-1.15286
ILMN_1697218	MED22	mediator complex subunit 22	0.000720312	0.0122495	-1.15324
ILMN_2227800	ARFGAP3	ADP-ribosylation factor GTPase activating protein 3	0.000341134	0.00794219	-1.15353
ILMN_1729563	UGDH	UDP-glucose 6-dehydrogenase	0.000583589	0.0107249	-1.15535
ILMN_1757552	PTRF	polymerase I and transcript release factor	0.000158153	0.00511229	-1.15556
ILMN_1716057	CAPN2	calpain 2, (m/II) large subunit	3.86743e-05	0.00263296	-1.15755
ILMN_1790650	C16orf63	chromosome 16 open reading frame 63	0.0025364	0.0263741	-1.15813
ILMN_2297765	KCNMA1	potassium large conductance calcium-activated channel, subfamily M, alpha member 1	0.000361651	0.00819055	-1.15947
ILMN_2174805	CD300LG	CD300 molecule-like family member g	0.00139174	0.0181305	-1.15988
ILMN_1688089	PEBP1	phosphatidylethanolamine binding protein 1	0.00174914	0.0208369	-1.16003
ILMN_2389429	DCUN1D4	DCN1, defective in cullin neddylation 1, domain containing 4 (S. cerevisiae)	8.58661e-05	0.00382675	-1.16045
ILMN_2340935	WBP5	WW domain binding protein 5	0.00332727	0.0315615	-1.16166
ILMN_1657790	SFRS11	serine/arginine-rich splicing factor 11	0.0019234	0.0222203	-1.16173
ILMN_1790637	C11orf80	chromosome 11 open reading frame 80	0.000537782	0.0102475	-1.16204
ILMN_1805725	B4GALNT1	beta-1,4-N-acetyl-galactosaminyl transferase 1	0.00260498	0.0268601	-1.16234
ILMN_1696003	GNAI3	guanine nucleotide binding protein (G protein), alpha inhibiting activity polypeptide 3	0.00286864	0.0287944	-1.16322
ILMN_1814194	TCF4	transcription factor 4	0.000802683	0.0129718	-1.16324
ILMN_2405684	BIRC3	baculoviral IAP repeat-containing 3	0.00082594	0.0131769	-1.16373
ILMN_2126423	ZNF480	zinc finger protein 480	0.00664931	0.0492497	-1.16392
ILMN_1663569	FTCD	formiminotransferase cyclodeaminase	0.00573641	0.0449854	-1.16454
ILMN_1803788	LGALS3	lectin, galactoside-binding, soluble, 3	0.00070934	0.0121391	-1.16578
ILMN_1719518	ARF4	ADP-ribosylation factor 4	0.00276578	0.028009	-1.16687
ILMN_2194828	C16orf53	chromosome 16 open reading frame 53	3.68704e-05	0.00260625	-1.16713
ILMN_1755115	RPL23	ribosomal protein L23	0.000294687	0.00734152	-1.16774
ILMN_1786388	RNF113A	ring finger protein 113A	0.00157413	0.019547	-1.16912
ILMN_1692058	NDN	necdin homolog (mouse)	0.00364075	0.0336648	-1.17088
ILMN_1803676	ENOSF1	enolase superfamily member 1	6.04756e-05	0.00333155	-1.17115
ILMN_1774083	TRIAP1	TP53 regulated inhibitor of apoptosis 1	0.000837638	0.0132643	-1.1727
ILMN_2055477	EXOSC7	exosome component 7	0.00408591	0.0362253	-1.17303
ILMN_1738150	SUMO2	SMT3 suppressor of mif two 3 homolog 2 (S. cerevisiae)	0.000928498	0.014177	-1.17335
ILMN_1663916	ARHGAP9	Rho GTPase activating protein 9	0.000558722	0.010423	-1.17343
ILMN_2054442	ZNF146	zinc finger protein 146	0.00216569	0.0238949	-1.17366
ILMN_1655377	MRPS22	mitochondrial ribosomal protein S22	0.00242552	0.0255063	-1.17453
ILMN_1731644	SETDB2	SET domain, bifurcated 2	0.000265473	0.006907	-1.17477
ILMN_2218277	RPS2	ribosomal protein S2	0.000582116	0.0107062	-1.17497
ILMN_1776649	LRRK2	leucine-rich repeat kinase 2	0.00596133	0.0459444	-1.17526
ILMN_1776109	ZNF622	zinc finger protein 622	0.000935074	0.0142588	-1.17694
ILMN_1654504	CLEC7A	C-type lectin domain family 7, member A	0.000196083	0.00583229	-1.177
ILMN_1775192	BCLAF1	BCL2-associated transcription factor 1	0.00143773	0.0184174	-1.17853
ILMN_1674698	AARS2	alanyl-tRNA synthetase 2, mitochondrial (putative)	1.54184e-06	0.000580304	-1.17879
ILMN_2043865	DCUN1D1	DCN1, defective in cullin neddylation 1, domain containing 1 (S. cerevisiae)	0.00577636	0.0450836	-1.17899
ILMN_1813753	PTN	pleiotrophin	0.00139941	0.0181645	-1.17935
ILMN_1728057	C6orf57	chromosome 6 open reading frame 57	0.00121589	0.0167751	-1.18006
ILMN_1651684	KIAA0586	KIAA0586	0.00568214	0.0446745	-1.18037
ILMN_2225135	GCNT1	glucosaminyl (N-acetyl) transferase 1, core 2	0.00152627	0.0191134	-1.18063
ILMN_1811387	TFF3	trefoil factor 3 (intestinal)	0.00332193	0.0315496	-1.1808
ILMN_1666552	ZNF75A	zinc finger protein 75a	0.00220304	0.0241593	-1.1812
ILMN_1659727	CDAN1	congenital dyserythropoietic anemia, type I	0.0045531	0.0388622	-1.18146
ILMN_1796912	ARHGEF7	Rho guanine nucleotide exchange factor (GEF) 7	0.000389988	0.00847429	-1.1817
ILMN_2401770	PHF14	PHD finger protein 14	0.00592878	0.0457611	-1.18244
ILMN_1802557	HEBP1	heme binding protein 1	0.00624977	0.0473892	-1.18323
ILMN_1724897	C14orf93	chromosome 14 open reading frame 93	0.0020954	0.0233609	-1.18344
ILMN_2160160	SNORD36C	small nucleolar RNA, C/D box 36C	0.000235949	0.00645366	-1.18345
ILMN_1773814	MUSTN1	musculoskeletal, embryonic nuclear protein 1	0.00353275	0.0329125	-1.18348
ILMN_1773561	RAP2C	RAP2C, member of RAS oncogene family	0.000781884	0.0128406	-1.18392
ILMN_1750661	FBXW9	F-box and WD repeat domain containing 9	0.0061503	0.0468926	-1.18429
ILMN_1703477	ARHGEF2	Rho/Rac guanine nucleotide exchange factor (GEF) 2	0.000186069	0.00563442	-1.1856
ILMN_2063114	JOSD3	TATA box binding protein (TBP)-associated factor, RNA polymerase I, D, 41kDa	0.00502696	0.041569	-1.18577
ILMN_2190414	ZNF83	zinc finger protein 83	3.36998e-05	0.00251116	-1.18657
ILMN_2115125	CTGF	connective tissue growth factor	0.00318942	0.0307137	-1.18673
ILMN_1691436	BLVRA	biliverdin reductase A	0.000943043	0.0143431	-1.1895
ILMN_1715131	CCR7	chemokine (C-C motif) receptor 7	0.000101212	0.00414529	-1.19037
ILMN_2200503	NIT2	nitrilase family, member 2	0.000837046	0.0132639	-1.19074
ILMN_1747305	GIMAP8	GTPase, IMAP family member 8	0.00139777	0.0181643	-1.19216
ILMN_1811592	ARHGAP21	Rho GTPase activating protein 21	0.00020493	0.00597347	-1.19218
ILMN_1736901	ZDHHC23	zinc finger, DHHC-type containing 23	0.00601004	0.0461681	-1.19281
ILMN_1792922	SOD2	superoxide dismutase 2, mitochondrial	0.000238075	0.00648716	-1.19432
ILMN_1755658	ABI3	ABI family, member 3	0.000902566	0.0139168	-1.19448
ILMN_1752932	MPZL2	myelin protein zero-like 2	0.00217276	0.0239209	-1.19463
ILMN_1737847	RMND5B	required for meiotic nuclear division 5 homolog B (S. cerevisiae)	0.00355775	0.0330798	-1.19543
ILMN_2051373	NEK2	NIMA (never in mitosis gene a)-related kinase 2	0.00150899	0.0190086	-1.19659
ILMN_1688464	MAP6D1	MAP6 domain containing 1	0.00169167	0.0203401	-1.19675
ILMN_1776777	ADAR	adenosine deaminase, RNA-specific	0.00617709	0.0470357	-1.19827
ILMN_1758457	TBC1D16	TBC1 domain family, member 16	0.00325539	0.0310812	-1.1983
ILMN_1652790	CLK1	CDC-like kinase 1	0.00190595	0.0220665	-1.1991
ILMN_2126239	SMG5	Smg-5 homolog, nonsense mediated mRNA decay factor (C. elegans)	4.20247e-07	0.000309548	-1.19921
ILMN_1771805	ELK4	ELK4, ETS-domain protein (SRF accessory protein 1)	0.000335692	0.00787803	-1.19972
ILMN_1664449	ALG5	asparagine-linked glycosylation 5, dolichyl-phosphate beta-glucosyltransferase homolog (S. cerevisiae)	0.00342919	0.032268	-1.20021
ILMN_1739805	NDE1	nudE nuclear distribution gene E homolog 1 (A. nidulans)	1.63343e-06	0.000580333	-1.20065
ILMN_1788095	SPRYD3	SPRY domain containing 3	0.00529847	0.0428623	-1.20083
ILMN_1765880	C16orf57	chromosome 16 open reading frame 57	0.000308018	0.00751482	-1.20397
ILMN_1715392	PRPF3	PRP3 pre-mRNA processing factor 3 homolog (S. cerevisiae)	0.000113936	0.00435162	-1.20401
ILMN_1733535	ZNF366	zinc finger protein 366	0.0029865	0.0295575	-1.2041
ILMN_2213680	ZCCHC10	zinc finger, CCHC domain containing 10	0.00231076	0.024796	-1.20536
ILMN_1666553	SLC25A19	solute carrier family 25 (mitochondrial thiamine pyrophosphate carrier), member 19	0.00522481	0.0424864	-1.2058
ILMN_1680129	NSUN2	NOP2/Sun domain family, member 2	9.84193e-06	0.00136333	-1.20613
ILMN_1771622	DRD1IP	calcyon neuron-specific vesicular protein	0.0041328	0.0365443	-1.2078
ILMN_1697166	C9orf78	chromosome 9 open reading frame 78	0.000488536	0.00960743	-1.20824
ILMN_1703791	ANXA7	annexin A7	0.00345533	0.0324099	-1.20852
ILMN_2368575	GIYD1	GIY-YIG domain containing 1	0.00298749	0.0295575	-1.20946
ILMN_1700413	MAFF	v-maf musculoaponeurotic fibrosarcoma oncogene homolog F (avian)	0.00125503	0.0170743	-1.21037
ILMN_1781097	UBXN4	UBX domain protein 4	0.0012658	0.0171709	-1.21074
ILMN_2210534	PRH1	proline-rich protein HaeIII subfamily 1	0.000286818	0.00726895	-1.21223
ILMN_2052383	R3HDM1	R3H domain containing 1	0.000172882	0.00539575	-1.21231
ILMN_1807894	SLC7A8	solute carrier family 7 (amino acid transporter, L-type), member 8	0.00270117	0.0275254	-1.21313
ILMN_1701413	PIGQ	phosphatidylinositol glycan anchor biosynthesis, class Q	0.00034956	0.00805051	-1.21566
ILMN_1699570	TPD52L2	tumor protein D52-like 2	3.52668e-05	0.00258429	-1.2159
ILMN_1720850	BAZ2B	bromodomain adjacent to zinc finger domain, 2B	0.00279574	0.0282196	-1.216
ILMN_2062524	RBBP4	retinoblastoma binding protein 4	0.00179709	0.0211505	-1.21682
ILMN_1751425	ERMP1	endoplasmic reticulum metallopeptidase 1	0.000397241	0.00857101	-1.21688
ILMN_1757440	FAM69B	family with sequence similarity 69, member B	0.000181593	0.00554899	-1.21693
ILMN_1804498	C7orf27	chromosome 7 open reading frame 27	9.78505e-06	0.00136333	-1.21869
ILMN_1724837	ZC3HAV1	zinc finger CCCH-type, antiviral 1	0.000659419	0.0116181	-1.21995
ILMN_2069821	C4orf32	chromosome 4 open reading frame 32	0.00507284	0.0418273	-1.22108
ILMN_1749502	ZNF215	zinc finger protein 215	0.00136869	0.0179544	-1.22112
ILMN_1806779	ZNF155	zinc finger protein 155	0.00051794	0.00995497	-1.22145
ILMN_1804611	C12orf23	chromosome 12 open reading frame 23	0.00163188	0.0199464	-1.22177
ILMN_1652505	APEX2	APEX nuclease (apurinic/apyrimidinic endonuclease) 2	0.00290595	0.0290694	-1.22194
ILMN_1775703	TRAPPC6A	trafficking protein particle complex 6A	0.00276725	0.028009	-1.22297
ILMN_1784540	KBTBD2	kelch repeat and BTB (POZ) domain containing 2	0.00163621	0.0199766	-1.22309
ILMN_2166831	RPS4X	ribosomal protein S4, X-linked	0.000156262	0.005099	-1.2231
ILMN_1802973	ANAPC4	anaphase promoting complex subunit 4	0.000823813	0.0131519	-1.22345
ILMN_1689111	CXCL12	chemokine (C-X-C motif) ligand 12	0.00339473	0.0319949	-1.22484
ILMN_1660186	SYF2	SYF2 homolog, RNA splicing factor (S. cerevisiae)	0.000585885	0.0107335	-1.22586
ILMN_1740319	FAM14A	interferon, alpha-inducible protein 27-like 2	0.000300948	0.00742655	-1.226
ILMN_2287653	PLAG1	pleiomorphic adenoma gene 1	0.00481641	0.0403828	-1.22624
ILMN_1666512	SKIV2L	superkiller viralicidic activity 2-like (S. cerevisiae)	0.00295451	0.0293355	-1.22903
ILMN_1680693	ZNF419	zinc finger protein 419	0.00077347	0.0127694	-1.22921
ILMN_1812940	TRMT1	TRM1 tRNA methyltransferase 1 homolog (S. cerevisiae)	0.000432446	0.00897478	-1.23053
ILMN_1721669	IDH3B	isocitrate dehydrogenase 3 (NAD+) beta	0.00301253	0.0296802	-1.23143
ILMN_1663538	CLYBL	citrate lyase beta like	0.0025629	0.0265663	-1.23254
ILMN_2049642	RPA1	replication protein A1, 70kDa	0.00252458	0.0262736	-1.23348
ILMN_1654488	UTX	lysine (K)-specific demethylase 6A	0.00124051	0.0169652	-1.23364
ILMN_2373982	PICK1	protein interacting with PRKCA 1	0.000335499	0.00787803	-1.23389
ILMN_1668090	STK25	serine/threonine kinase 25	1.93767e-07	0.000267515	-1.23412
ILMN_1723287	SLC6A16	solute carrier family 6, member 16	0.000167955	0.00531926	-1.23422
ILMN_2156267	EIF2AK1	eukaryotic translation initiation factor 2-alpha kinase 1	0.00673649	0.0497809	-1.23437
ILMN_1776151	OLFML1	olfactomedin-like 1	0.00228834	0.0246682	-1.23465
ILMN_1813703	RALGPS2	Ral GEF with PH domain and SH3 binding motif 2	0.00521231	0.0424583	-1.23592
ILMN_2084073	UCN	urocortin	0.00132677	0.0175955	-1.23702
ILMN_1687848	C7	complement component 7	0.000743858	0.0125139	-1.23783
ILMN_2398627	TENC1	tensin like C1 domain containing phosphatase (tensin 2)	0.00167984	0.0202686	-1.23833
ILMN_1739605	LYPD3	LY6/PLAUR domain containing 3	0.00229943	0.0247423	-1.23869
ILMN_1714417	PSEN2	presenilin 2 (Alzheimer disease 4)	0.000318149	0.00764168	-1.2391
ILMN_1797693	BRI3BP	BRI3 binding protein	6.59265e-05	0.00341554	-1.2392
ILMN_1770293	KLF5	Kruppel-like factor 5 (intestinal)	0.00420962	0.037056	-1.23937
ILMN_1772731	HAGH	hydroxyacylglutathione hydrolase	0.00149859	0.0189284	-1.23944
ILMN_1661594	C2orf42	chromosome 2 open reading frame 42	0.000644264	0.0114964	-1.24015
ILMN_2206344	NDST2	N-deacetylase/N-sulfotransferase (heparan glucosaminyl) 2	0.0053293	0.043023	-1.24052
ILMN_2347999	IFNAR2	interferon (alpha, beta and omega) receptor 2	0.00548924	0.0437573	-1.24063
ILMN_1725314	GBP3	guanylate binding protein 3	0.000423365	0.0089028	-1.24115
ILMN_1764769	VWA5A	von Willebrand factor A domain containing 5A	0.000113941	0.00435162	-1.24126
ILMN_1653028	COL4A1	collagen, type IV, alpha 1	0.000212667	0.00608642	-1.24162
ILMN_1680313	STX4	syntaxin 4	0.000397034	0.00857101	-1.24243
ILMN_2322935	MAPKAPK5	mitogen-activated protein kinase-activated protein kinase 5	8.82055e-05	0.00385476	-1.24244
ILMN_1656361	ARHGAP27	Rho GTPase activating protein 27	0.00595262	0.0458995	-1.24281
ILMN_2288915	DNAJB14	DnaJ (Hsp40) homolog, subfamily B, member 14	0.000453498	0.00919485	-1.24398
ILMN_2296843	GCDH	glutaryl-CoA dehydrogenase	1.0418e-05	0.0013803	-1.2447
ILMN_1713823	KGFLP1	fibroblast growth factor 7 pseudogene	0.00196906	0.0224866	-1.24514
ILMN_1754076	CACNA2D3	calcium channel, voltage-dependent, alpha 2/delta subunit 3	0.000753602	0.0125518	-1.24515
ILMN_1712532	CARD9	caspase recruitment domain family, member 9	0.00192315	0.0222203	-1.24581
ILMN_2401933	ATP2B1	ATPase, Ca++ transporting, plasma membrane 1	0.00083149	0.0132163	-1.24607
ILMN_2119224	KIFAP3	kinesin-associated protein 3	0.00141322	0.0182706	-1.24615
ILMN_1695290	FERMT2	fermitin family member 2	0.00058584	0.0107335	-1.24668
ILMN_2162989	TMEM189	transmembrane protein 189	0.00025565	0.00676391	-1.24682
ILMN_2380771	AKR1A1	aldo-keto reductase family 1, member A1 (aldehyde reductase)	0.00435508	0.0378958	-1.24937
ILMN_1658962	LCP2	lymphocyte cytosolic protein 2 (SH2 domain containing leukocyte protein of 76kDa)	0.00553821	0.0439856	-1.25012
ILMN_2398235	PIK3R1	phosphoinositide-3-kinase, regulatory subunit 1 (alpha)	0.00194863	0.0223184	-1.25053
ILMN_1773886	MED21	mediator complex subunit 21	0.000731326	0.0123526	-1.2506
ILMN_2367070	ACOT9	acyl-CoA thioesterase 9	0.00153743	0.0191815	-1.25076
ILMN_1722855	VEGFB	vascular endothelial growth factor B	0.0047465	0.0399823	-1.25097
ILMN_1792078	ZNF313	ring finger protein 114	0.000420421	0.00888069	-1.25205
ILMN_2388517	MTERFD3	MTERF domain containing 3	0.000409855	0.00873612	-1.25218
ILMN_1734312	GCN1L1	GCN1 general control of amino-acid synthesis 1-like 1 (yeast)	0.000300103	0.00741352	-1.25227
ILMN_2169152	SRGN	serglycin	0.00624745	0.047387	-1.25434
ILMN_2380754	CCNG1	cyclin G1	0.00116589	0.016387	-1.25477
ILMN_1802627	PSMG3	proteasome (prosome, macropain) assembly chaperone 3	0.00206428	0.0230908	-1.25478
ILMN_1729546	C19orf54	chromosome 19 open reading frame 56	0.000546843	0.0102998	-1.25549
ILMN_1735827	NISCH	nischarin	0.000732218	0.0123535	-1.25616
ILMN_1656186	SLC41A1	solute carrier family 41, member 1	0.00547562	0.0437229	-1.25626
ILMN_2167259	FAM151A	family with sequence similarity 151, member A	0.00142746	0.0183459	-1.25644
ILMN_2358277	RSRC2	arginine/serine-rich coiled-coil 2	0.000656193	0.0116058	-1.25745
ILMN_2200917	SLC4A7	solute carrier family 4, sodium bicarbonate cotransporter, member 7	0.000979429	0.0146893	-1.25794
ILMN_1777049	ZNF160	zinc finger protein 160	5.47077e-05	0.00313907	-1.25846
ILMN_1739854	C15orf29	chromosome 15 open reading frame 29	2.88387e-05	0.0023037	-1.25899
ILMN_1789176	PSMB1	proteasome (prosome, macropain) subunit, beta type, 1	0.000111153	0.00430451	-1.25969
ILMN_2415170	VPS8	vacuolar protein sorting 8 homolog (S. cerevisiae)	0.00316702	0.0305721	-1.25989
ILMN_2227368	SELT	selenoprotein T	0.000242617	0.00655381	-1.26052
ILMN_1684197	GPKOW	G patch domain and KOW motifs	0.000658166	0.0116058	-1.26118
ILMN_1791884	SNHG11	small nucleolar RNA host gene 11 (non-protein coding)	0.000712301	0.0121573	-1.26162
ILMN_1761797	CSTB	cystatin B (stefin B)	0.0023864	0.025292	-1.26164
ILMN_1778488	WDR41	WD repeat domain 41	0.0044324	0.0382898	-1.26218
ILMN_1699112	COPB1	coatomer protein complex, subunit beta 1	0.00154037	0.019208	-1.26224
ILMN_1753016	MRPL35	mitochondrial ribosomal protein L35	0.00624329	0.0473707	-1.26304
ILMN_1796165	GLRX5	glutaredoxin 5	0.000122036	0.00451727	-1.26408
ILMN_1729237	CYB5R1	cytochrome b5 reductase 1	0.00204931	0.0230331	-1.26421
ILMN_2056167	OSTC	oligosaccharyltransferase complex subunit	0.000802957	0.0129718	-1.26438
ILMN_1729294	RNF130	ring finger protein 130	0.00165743	0.0201016	-1.26606
ILMN_1764577	MFNG	MFNG O-fucosylpeptide 3-beta-N-acetylglucosaminyltransferase	0.000409646	0.00873612	-1.26704
ILMN_1766657	STOM	stomatin	0.000370058	0.00827098	-1.26708
ILMN_1788268	NAPG	N-ethylmaleimide-sensitive factor attachment protein, gamma	0.00145482	0.0186058	-1.26743
ILMN_1653203	EFEMP2	EGF-containing fibulin-like extracellular matrix protein 2	0.00132709	0.0175955	-1.26772
ILMN_1733276	CYSLTR1	cysteinyl leukotriene receptor 1	0.000513179	0.00990402	-1.26874
ILMN_2159859	LYSMD4	LysM, putative peptidoglycan-binding, domain containing 4	0.00269094	0.0274331	-1.26889
ILMN_2124155	ATP11B	ATPase, class VI, type 11B	0.00320133	0.0307905	-1.2698
ILMN_1733648	SNAP91	synaptosomal-associated protein, 91kDa homolog (mouse)	0.00020695	0.00599429	-1.27021
ILMN_1810855	C15orf58	chromosome 15 open reading frame 58	0.000104636	0.00419347	-1.27065
ILMN_1673962	NUP205	nucleoporin 205kDa	0.00453668	0.0388074	-1.27187
ILMN_2225735	CRBN	cereblon	0.000120557	0.00448371	-1.27203
ILMN_1722066	ARMC1	armadillo repeat containing 1	0.00121368	0.0167545	-1.27218
ILMN_1670325	SLC47A1	solute carrier family 47, member 1	0.00251914	0.0262359	-1.27316
ILMN_1790953	TBCB	tubulin folding cofactor B	0.000675718	0.0117989	-1.2735
ILMN_1768117	RBM25	RNA binding motif protein 25	0.000217749	0.00618427	-1.27373
ILMN_1768510	MAN2B2	mannosidase, alpha, class 2B, member 2	6.68974e-05	0.00342037	-1.27397
ILMN_2234187	CDO1	cysteine dioxygenase, type I	0.00158683	0.0196282	-1.27443
ILMN_1704195	FUK	fucokinase	5.86475e-05	0.00329268	-1.27471
ILMN_2107655	SNORD116-2	small nucleolar RNA, C/D box 116-2	7.17346e-05	0.00350874	-1.27476
ILMN_1667825	MLKL	mixed lineage kinase domain-like	9.78369e-05	0.00406253	-1.27574
ILMN_1809944	TRMT12	tRNA methyltransferase 12 homolog (S. cerevisiae)	3.40974e-05	0.00252428	-1.27685
ILMN_1696046	SIVA1	SIVA1, apoptosis-inducing factor	0.000752348	0.0125518	-1.27785
ILMN_1797933	MRPL17	mitochondrial ribosomal protein L17	0.000656599	0.0116058	-1.27821
ILMN_1749629	CUL1	cullin 1	0.000861495	0.0135597	-1.27834
ILMN_2294442	SNURF	SNRPN upstream reading frame	0.000293205	0.00733694	-1.27838
ILMN_2183216	TTRAP	tyrosyl-DNA phosphodiesterase 2	0.00631636	0.0476883	-1.27875
ILMN_1753342	SAT1	spermidine/spermine N1-acetyltransferase 1	0.00301877	0.0296917	-1.28042
ILMN_2341229	CD34	CD34 molecule	0.000617133	0.0111236	-1.28085
ILMN_1774982	CDC42EP5	CDC42 effector protein (Rho GTPase binding) 5	0.000615482	0.0111194	-1.28115
ILMN_2077733	NAA25	N(alpha)-acetyltransferase 25, NatB auxiliary subunit	0.000374185	0.00829998	-1.28242
ILMN_1660232	PEX5	peroxisomal biogenesis factor 5	0.000311528	0.00755989	-1.28328
ILMN_2159044	PDF	peptide deformylase (mitochondrial)	0.000302431	0.00744749	-1.28567
ILMN_1697959	SLC35B4	solute carrier family 35, member B4	3.97836e-05	0.00264488	-1.28576
ILMN_1801605	BIRC6	baculoviral IAP repeat-containing 6	0.000687299	0.0119095	-1.28585
ILMN_1701434	RAP1B	RAP1B, member of RAS oncogene family	0.000539441	0.0102673	-1.28705
ILMN_1656482	OSBPL2	oxysterol binding protein-like 2	0.00288446	0.028879	-1.2873
ILMN_1671158	MRPL13	mitochondrial ribosomal protein L13	0.000452326	0.00919485	-1.28745
ILMN_1752988	C11orf17	chromosome 11 open reading frame 17	0.000808846	0.0129836	-1.28803
ILMN_1734867	NR2C1	nuclear receptor subfamily 2, group C, member 1	0.00646651	0.0482531	-1.28898
ILMN_1711543	C14orf169	chromosome 14 open reading frame 169	0.00045215	0.00919485	-1.29054
ILMN_1711909	EDEM2	ER degradation enhancer, mannosidase alpha-like 2	0.00438042	0.0380036	-1.29122
ILMN_1729430	FBXO18	F-box protein, helicase, 18	0.00035875	0.00815965	-1.29168
ILMN_1687419	DHX8	DEAH (Asp-Glu-Ala-His) box polypeptide 8	0.000876243	0.0136545	-1.29186
ILMN_1767020	DENND1C	DENN/MADD domain containing 1C	0.000383181	0.00837937	-1.293
ILMN_1774074	RXRB	retinoid X receptor, beta	0.000231628	0.0064102	-1.29326
ILMN_1661337	SRM	spermidine synthase	0.000131391	0.00464381	-1.2933
ILMN_2129234	TMEM47	transmembrane protein 47	0.00040767	0.00872124	-1.29366
ILMN_2413278	RPL13	ribosomal protein L13	0.000569865	0.0105804	-1.29374
ILMN_2163796	RABGGTB	Rab geranylgeranyltransferase, beta subunit	0.000967445	0.0145725	-1.29379
ILMN_2169839	CNBP	CCHC-type zinc finger, nucleic acid binding protein	0.00672135	0.0497015	-1.29424
ILMN_1695745	DISP1	dispatched homolog 1 (Drosophila)	0.000153929	0.00504687	-1.29461
ILMN_1708147	TBPL1	TBP-like 1	0.00517954	0.0423678	-1.29461
ILMN_1652736	RPS6KA3	ribosomal protein S6 kinase, 90kDa, polypeptide 3	0.00485835	0.0406039	-1.2956
ILMN_2050761	EIF4E	eukaryotic translation initiation factor 4E	0.00101158	0.0149967	-1.29676
ILMN_1663640	MAOA	monoamine oxidase A	0.00388292	0.0351324	-1.298
ILMN_2389844	SP3	Sp3 transcription factor	0.00279133	0.0281872	-1.29852
ILMN_1784630	KBTBD11	kelch repeat and BTB (POZ) domain containing 11	0.00246334	0.0258189	-1.29911
ILMN_1750549	PI4K2A	phosphatidylinositol 4-kinase type 2 alpha	0.000202611	0.00592877	-1.29969
ILMN_2202790	MCFD2	multiple coagulation factor deficiency 2	0.00251984	0.0262359	-1.29987
ILMN_1706521	CSNK1G2	casein kinase 1, gamma 2	0.00136753	0.0179492	-1.3003
ILMN_1669931	TM9SF3	transmembrane 9 superfamily member 3	0.000537878	0.0102475	-1.3015
ILMN_1735958	METTL2B	methyltransferase like 2B	0.000657146	0.0116058	-1.30232
ILMN_2098446	PMAIP1	phorbol-12-myristate-13-acetate-induced protein 1	0.000657762	0.0116058	-1.3027
ILMN_1667356	CCDC128	KLRAQ motif containing 1	0.000127758	0.0046269	-1.30271
ILMN_1704943	GPN3	GPN-loop GTPase 3	0.000650397	0.0115458	-1.30281
ILMN_2115862	ESPNL	espin-like	0.000325551	0.00775638	-1.30338
ILMN_1706376	OSBP	oxysterol binding protein	0.00160094	0.0196809	-1.30373
ILMN_2380801	FYN	FYN oncogene related to SRC, FGR, YES	0.00479392	0.0402109	-1.30375
ILMN_1668063	FCN1	ficolin (collagen/fibrinogen domain containing) 1	0.000240472	0.00651664	-1.30419
ILMN_2193980	ABCB6	ATP-binding cassette, sub-family B (MDR/TAP), member 6	0.000291173	0.00730829	-1.30482
ILMN_1715173	RPS6KA1	ribosomal protein S6 kinase, 90kDa, polypeptide 1	0.000303123	0.00744867	-1.30523
ILMN_1657373	LEPREL1	leprecan-like 1	0.000222361	0.00623461	-1.30588
ILMN_1774735	DDB1	damage-specific DNA binding protein 1, 127kDa	0.00384843	0.0349381	-1.30638
ILMN_1679881	WRN	Werner syndrome, RecQ helicase-like	0.00404055	0.0359589	-1.30641
ILMN_2147471	PI4K2B	phosphatidylinositol 4-kinase type 2 beta	0.0026713	0.0273278	-1.30679
ILMN_1769503	ZNRF2	zinc and ring finger 2	0.00120479	0.0167006	-1.30688
ILMN_2367275	BCL7B	B-cell CLL/lymphoma 7B	0.000443831	0.0091085	-1.30788
ILMN_1693664	POMGNT1	protein O-linked mannose beta1,2-N-acetylglucosaminyltransferase	0.000319673	0.0076552	-1.30837
ILMN_1737163	SH3BGRL3	SH3 domain binding glutamic acid-rich protein like 3	0.00669371	0.0495233	-1.30872
ILMN_1682699	PBX2	pre-B-cell leukemia homeobox 2	0.000378245	0.00834272	-1.30923
ILMN_1651378	AUP1	ancient ubiquitous protein 1	3.55664e-05	0.00258429	-1.31072
ILMN_1801923	ATF1	activating transcription factor 1	0.000444402	0.0091085	-1.31097
ILMN_1741942	STX16	syntaxin 16	0.0017446	0.0207934	-1.31099
ILMN_1669696	ZNF792	zinc finger protein 792	0.000870829	0.0136252	-1.31105
ILMN_1761083	HNRNPA3	heterogeneous nuclear ribonucleoprotein A3	0.000151995	0.0050169	-1.31134
ILMN_1651872	UBIAD1	UbiA prenyltransferase domain containing 1	0.000205529	0.00597347	-1.31134
ILMN_1709728	SLC30A5	solute carrier family 30 (zinc transporter), member 5	0.00517531	0.042348	-1.31149
ILMN_1743505	VPS24	vacuolar protein sorting 24 homolog (S. cerevisiae)	0.00148188	0.0188186	-1.3119
ILMN_1696702	NEO1	neogenin 1	0.000308368	0.00751482	-1.31273
ILMN_1689189	ZBTB3	zinc finger and BTB domain containing 3	0.000258147	0.00679171	-1.31281
ILMN_1717757	CALML4	calmodulin-like 4	0.000373157	0.00829998	-1.31423
ILMN_1710710	DEDD	death effector domain containing	0.00323956	0.0310564	-1.31494
ILMN_1713752	SERINC3	serine incorporator 3	0.0003715	0.00828742	-1.31607
ILMN_1717180	MTMR6	myotubularin related protein 6	0.0041096	0.0364	-1.31658
ILMN_1706505	COL5A1	collagen, type V, alpha 1	0.000722404	0.0122673	-1.31837
ILMN_1675150	HKR1	HKR1, GLI-Kruppel zinc finger family member	7.29321e-05	0.00350874	-1.32034
ILMN_2380566	SIAH1	seven in absentia homolog 1 (Drosophila)	0.000342758	0.00795632	-1.32037
ILMN_1684628	ZFP90	zinc finger protein 90 homolog (mouse)	0.000222307	0.00623461	-1.3204
ILMN_2402131	TAF15	TAF15 RNA polymerase II, TATA box binding protein (TBP)-associated factor, 68kDa	0.000591637	0.0108036	-1.32055
ILMN_1672417	PTPRCAP	protein tyrosine phosphatase, receptor type, C-associated protein	0.00240409	0.025414	-1.32182
ILMN_2150284	RNPC3	RNA-binding region (RNP1, RRM) containing 3	0.00123537	0.0169214	-1.32269
ILMN_1683212	SLC25A32	solute carrier family 25, member 32	0.00139863	0.0181643	-1.32324
ILMN_1753782	ZNF266	zinc finger protein 266	0.000987321	0.0147548	-1.32389
ILMN_2053345	KCNT2	potassium channel, subfamily T, member 2	8.57351e-05	0.00382675	-1.32396
ILMN_1811650	DUS2L	dihydrouridine synthase 2-like, SMM1 homolog (S. cerevisiae)	0.000175156	0.00544444	-1.32464
ILMN_1805449	TAPBPL	TAP binding protein-like	0.00548759	0.0437573	-1.32503
ILMN_1794364	CTSW	cathepsin W	0.00131186	0.0175111	-1.32521
ILMN_1782788	CSDA	cold shock domain protein A	0.00021112	0.00605691	-1.32553
ILMN_2168217	EBI2	G protein-coupled receptor 183	0.00042713	0.00894192	-1.32586
ILMN_1784774	P2RY10	purinergic receptor P2Y, G-protein coupled, 10	0.000501287	0.00978719	-1.32612
ILMN_1784176	ABCA5	ATP-binding cassette, sub-family A (ABC1), member 5	0.00417917	0.036871	-1.32632
ILMN_2124833	TRAT1	T cell receptor associated transmembrane adaptor 1	0.0016883	0.0203185	-1.32636
ILMN_2140207	ATPBD4	ATP binding domain 4	8.44384e-05	0.00380565	-1.32651
ILMN_1666385	CALM3	calmodulin 3 (phosphorylase kinase, delta)	0.000198075	0.00585443	-1.32704
ILMN_2299450	P2RX2	purinergic receptor P2X, ligand-gated ion channel, 2	0.000860053	0.0135552	-1.32877
ILMN_1661596	FLVCR1	feline leukemia virus subgroup C cellular receptor 1	0.00109923	0.0157778	-1.329
ILMN_1795937	VIL2	ezrin	0.00524669	0.0426201	-1.32954
ILMN_2261076	NEDD9	neural precursor cell expressed, developmentally down-regulated 9	0.000800865	0.0129718	-1.32976
ILMN_2052163	YIPF1	Yip1 domain family, member 1	0.000499379	0.00976619	-1.33099
ILMN_1703330	FEM1C	fem-1 homolog c (C. elegans)	0.00629507	0.0475647	-1.33139
ILMN_2406557	ALDH4A1	aldehyde dehydrogenase 4 family, member A1	0.00102382	0.0150392	-1.33205
ILMN_1741204	KLHDC2	kelch domain containing 2	0.000549001	0.0103093	-1.33268
ILMN_1691432	PRDM4	PR domain containing 4	7.60943e-05	0.00357639	-1.33388
ILMN_1661484	ZBTB45	zinc finger and BTB domain containing 45	0.00131192	0.0175111	-1.33577
ILMN_1664815	ELK4	ELK4, ETS-domain protein (SRF accessory protein 1)	0.000512133	0.00989728	-1.33666
ILMN_1755405	PGAP2	post-GPI attachment to proteins 2	0.00020043	0.00588083	-1.3385
ILMN_2046315	GABARAPL2	GABA(A) receptor-associated protein-like 2	0.00159536	0.0196773	-1.3389
ILMN_2058347	NT5DC1	5'-nucleotidase domain containing 1	0.00206083	0.0230742	-1.33969
ILMN_1671565	RNASET2	ribonuclease T2	0.000272901	0.00703786	-1.34093
ILMN_1786972	SARS	seryl-tRNA synthetase	0.000936156	0.014266	-1.34097
ILMN_1776905	FAM23B	family with sequence similarity 23, member B	0.000420238	0.00888069	-1.34113
ILMN_2284744	HNMT	histamine N-methyltransferase	0.000344451	0.00797509	-1.34125
ILMN_1791211	DOK2	docking protein 2, 56kDa	0.00160293	0.0196847	-1.34144
ILMN_1723042	CLDN3	claudin 3	0.00336326	0.031788	-1.34169
ILMN_1663667	FLAD1	FAD1 flavin adenine dinucleotide synthetase homolog (S. cerevisiae)	8.72721e-05	0.0038354	-1.342
ILMN_1732577	TMEM216	transmembrane protein 216	0.000199349	0.00588083	-1.342
ILMN_2298511	BOLA2	bolA homolog 2 (E. coli)	0.000447912	0.00915645	-1.34208
ILMN_1696601	VARS	valyl-tRNA synthetase	0.000628677	0.0112624	-1.34244
ILMN_1678939	VNN2	vanin 2	0.00217288	0.0239209	-1.34246
ILMN_1696935	RBM39	RNA binding motif protein 39	0.000619	0.0111487	-1.34324
ILMN_2115421	SLC25A16	solute carrier family 25 (mitochondrial carrier; Graves disease autoantigen), member 16	0.00215148	0.0237605	-1.34358
ILMN_2357976	BAT1	HLA-B associated transcript 1	0.000352071	0.00806157	-1.34436
ILMN_1697448	TXNIP	thioredoxin interacting protein	0.000376771	0.00834157	-1.34488
ILMN_1778557	CDC2L5	cyclin-dependent kinase 13	0.00514909	0.0422514	-1.34546
ILMN_2341815	TFG	TRK-fused gene	0.00120245	0.0166878	-1.34594
ILMN_1764873	ELAVL1	ELAV (embryonic lethal, abnormal vision, Drosophila)-like 1 (Hu antigen R)	0.00613706	0.046822	-1.3462
ILMN_2073592	CAND2	cullin-associated and neddylation-dissociated 2 (putative)	0.00120867	0.0167345	-1.34679
ILMN_1658373	PAN2	PAN2 poly(A) specific ribonuclease subunit homolog (S. cerevisiae)	0.0033939	0.0319949	-1.34701
ILMN_1723414	HACL1	2-hydroxyacyl-CoA lyase 1	0.00344842	0.0323969	-1.34829
ILMN_1794038	FAM49A	family with sequence similarity 49, member A	0.00485765	0.0406039	-1.34887
ILMN_1804663	THBS3	thrombospondin 3	0.000479745	0.00951705	-1.35009
ILMN_1669033	NCOA1	nuclear receptor coactivator 1	0.000540396	0.0102688	-1.35066
ILMN_1766797	CCS	copper chaperone for superoxide dismutase	0.000925141	0.0141375	-1.35094
ILMN_1668012	SLC25A13	solute carrier family 25, member 13 (citrin)	6.15189e-05	0.00334971	-1.3516
ILMN_2390227	TBC1D9B	TBC1 domain family, member 9B (with GRAM domain)	0.000270522	0.00699958	-1.35194
ILMN_1768031	DEDD2	death effector domain containing 2	0.000814551	0.0130306	-1.35208
ILMN_1753393	OSGEP	O-sialoglycoprotein endopeptidase	0.000159584	0.00514386	-1.3528
ILMN_1783182	FBN1	fibrillin 1	0.00099108	0.0147862	-1.35319
ILMN_1791186	ARHGAP18	Rho GTPase activating protein 18	3.54307e-05	0.00258429	-1.35368
ILMN_1733696	IMP3	IMP3, U3 small nucleolar ribonucleoprotein, homolog (yeast)	0.000215903	0.0061565	-1.35398
ILMN_1655052	TRNT1	tRNA nucleotidyl transferase, CCA-adding, 1	0.00277652	0.0280738	-1.35548
ILMN_2284591	OPA3	optic atrophy 3 (autosomal recessive, with chorea and spastic paraplegia)	0.000176475	0.00545655	-1.35623
ILMN_1693045	TMED1	transmembrane emp24 protein transport domain containing 1	0.000132835	0.00467353	-1.35646
ILMN_1669718	PSENEN	presenilin enhancer 2 homolog (C. elegans)	0.00577389	0.0450836	-1.35651
ILMN_1684321	CYB5B	cytochrome b5 type B (outer mitochondrial membrane)	0.000476102	0.00948806	-1.35694
ILMN_1757317	LARS	leucyl-tRNA synthetase	0.00437479	0.0379688	-1.3574
ILMN_1791436	EZH1	enhancer of zeste homolog 1 (Drosophila)	0.00316022	0.030533	-1.35864
ILMN_1737426	PCMTD1	protein-L-isoaspartate (D-aspartate) O-methyltransferase domain containing 1	5.40677e-07	0.000317215	-1.35893
ILMN_1785486	ERG	v-ets erythroblastosis virus E26 oncogene homolog (avian)	0.00266941	0.0273204	-1.35913
ILMN_1759973	NDUFA5	NADH dehydrogenase (ubiquinone) 1 alpha subcomplex, 5, 13kDa	0.000427058	0.00894192	-1.35984
ILMN_2152131	ACTB	actin, beta	0.000234636	0.00644769	-1.35993
ILMN_1741957	RABEPK	Rab9 effector protein with kelch motifs	0.000126734	0.00461831	-1.36051
ILMN_1694877	CASP6	caspase 6, apoptosis-related cysteine peptidase	0.00040809	0.00872227	-1.36174
ILMN_2398664	RNF34	ring finger protein 34	0.000318599	0.00764168	-1.36186
ILMN_1654013	C17orf28	chromosome 17 open reading frame 28	0.000383414	0.00837937	-1.36222
ILMN_1807981	SIGIRR	single immunoglobulin and toll-interleukin 1 receptor (TIR) domain	0.000394928	0.00855787	-1.36248
ILMN_1660698	GTPBP8	GTP-binding protein 8 (putative)	0.00020592	0.00597347	-1.36268
ILMN_1679809	GSTP1	glutathione S-transferase pi 1	0.00542357	0.0435147	-1.3629
ILMN_1794726	RNF167	ring finger protein 167	0.000290225	0.00730388	-1.36442
ILMN_1738179	FOXP1	forkhead box P1	0.00338967	0.0319949	-1.36449
ILMN_1669484	WDR6	WD repeat domain 6	0.00297589	0.0294925	-1.36617
ILMN_2337241	RPS15A	ribosomal protein S15a	0.000128552	0.00463192	-1.36655
ILMN_2086470	PDGFRA	platelet-derived growth factor receptor, alpha polypeptide	0.00102534	0.0150392	-1.36733
ILMN_2216265	LONP2	lon peptidase 2, peroxisomal	0.00599449	0.046094	-1.36819
ILMN_1707088	DENND2D	DENN/MADD domain containing 2D	0.00314308	0.0304806	-1.37043
ILMN_1748147	MTO1	mitochondrial translation optimization 1 homolog (S. cerevisiae)	0.000429232	0.00896238	-1.37071
ILMN_2377109	LCK	lymphocyte-specific protein tyrosine kinase	0.000172392	0.00539575	-1.37267
ILMN_1741736	DDX28	DEAD (Asp-Glu-Ala-Asp) box polypeptide 28	0.000291648	0.0073124	-1.37347
ILMN_1737025	PLCL2	phospholipase C-like 2	0.00278285	0.0281257	-1.37383
ILMN_2389376	WDR23	DDB1 and CUL4 associated factor 11	0.000337343	0.00790887	-1.37434
ILMN_2331163	CUL4A	cullin 4A	0.000340672	0.00793932	-1.37451
ILMN_1739641	MTMR3	myotubularin related protein 3	3.40638e-05	0.00252428	-1.37558
ILMN_1708160	KPNA2	karyopherin alpha 2 (RAG cohort 1, importin alpha 1)	0.000302896	0.00744867	-1.37634
ILMN_2171289	SAMSN1	SAM domain, SH3 domain and nuclear localization signals 1	0.00148147	0.0188186	-1.37653
ILMN_1651828	CCT3	chaperonin containing TCP1, subunit 3 (gamma)	0.000137435	0.00475668	-1.37688
ILMN_1728605	TTC3	tetratricopeptide repeat domain 3	0.000109897	0.00427706	-1.37697
ILMN_1748476	NOP58	NOP58 ribonucleoprotein homolog (yeast)	0.00131992	0.01756	-1.37801
ILMN_1773849	ATP6V0C	ATPase, H+ transporting, lysosomal 16kDa, V0 subunit c	0.00657037	0.0488263	-1.37842
ILMN_1657547	CCDC34	coiled-coil domain containing 34	0.00245408	0.0257453	-1.37847
ILMN_1774602	FBLN2	fibulin 2	5.04166e-05	0.00304158	-1.37957
ILMN_1713884	C16orf42	chromosome 16 open reading frame 42	0.0010167	0.0150062	-1.37978
ILMN_1683475	TOMM40	translocase of outer mitochondrial membrane 40 homolog (yeast)	0.000771678	0.0127533	-1.38003
ILMN_1664168	SLC25A11	solute carrier family 25 (mitochondrial carrier; oxoglutarate carrier), member 11	0.000118099	0.00444871	-1.38091
ILMN_1810191	PLA2G4C	phospholipase A2, group IVC (cytosolic, calcium-independent)	0.000466905	0.00935724	-1.38151
ILMN_1702503	ALDH3A1	aldehyde dehydrogenase 3 family, member A1	0.000724001	0.0122769	-1.38168
ILMN_1666819	PHLDB1	pleckstrin homology-like domain, family B, member 1	0.00121262	0.0167497	-1.38205
ILMN_1662026	BTK	Bruton agammaglobulinemia tyrosine kinase	0.000632214	0.0113172	-1.3821
ILMN_1790909	NFE2L2	nuclear factor (erythroid-derived 2)-like 2	0.00466779	0.039575	-1.38249
ILMN_2333865	DNAJB12	DnaJ (Hsp40) homolog, subfamily B, member 12	0.00232833	0.0249242	-1.38258
ILMN_1680692	NUCKS1	nuclear casein kinase and cyclin-dependent kinase substrate 1	4.5058e-05	0.00288126	-1.38267
ILMN_1799815	XYLT2	xylosyltransferase II	6.50604e-05	0.00341554	-1.38282
ILMN_1682375	CTU1	cytosolic thiouridylase subunit 1 homolog (S. pombe)	0.00052136	0.00999614	-1.38296
ILMN_1744006	GFOD2	glucose-fructose oxidoreductase domain containing 2	0.00022027	0.0062107	-1.383
ILMN_2103720	MRPL15	mitochondrial ribosomal protein L15	5.17433e-05	0.00307473	-1.38462
ILMN_1814465	UBE2G1	ubiquitin-conjugating enzyme E2G 1 (UBC7 homolog, yeast)	0.00393266	0.0353856	-1.38472
ILMN_2408815	NAP1L1	nucleosome assembly protein 1-like 1	0.000708764	0.0121391	-1.38476
ILMN_1815012	EXOC7	exocyst complex component 7	2.23194e-05	0.00208943	-1.38555
ILMN_1799600	STARD8	StAR-related lipid transfer (START) domain containing 8	5.41311e-05	0.00312125	-1.38617
ILMN_2342793	FBXW8	F-box and WD repeat domain containing 8	0.00163055	0.0199405	-1.38699
ILMN_2129309	SEC23A	Sec23 homolog A (S. cerevisiae)	0.00213813	0.0236687	-1.38837
ILMN_2213247	SPCS2	signal peptidase complex subunit 2 homolog (S. cerevisiae)	0.000781369	0.0128406	-1.38896
ILMN_1676575	IKZF1	IKAROS family zinc finger 1 (Ikaros)	0.00185199	0.0216447	-1.38902
ILMN_2191167	SLC30A4	solute carrier family 30 (zinc transporter), member 4	0.00222887	0.0243289	-1.38909
ILMN_2343273	FAM70B	family with sequence similarity 70, member B	4.67929e-05	0.00290512	-1.38938
ILMN_1682572	KIAA0528	KIAA0528	0.000129081	0.00463192	-1.39206
ILMN_1671392	KCNF1	potassium voltage-gated channel, subfamily F, member 1	0.000713471	0.0121596	-1.39401
ILMN_1665738	FLI1	Friend leukemia virus integration 1	0.00140343	0.0181965	-1.39593
ILMN_2356574	GTF3C2	general transcription factor IIIC, polypeptide 2, beta 110kDa	0.000123001	0.00454237	-1.39658
ILMN_1799860	PIGM	phosphatidylinositol glycan anchor biosynthesis, class M	0.000339699	0.00793932	-1.39676
ILMN_2395204	SLTM	SAFB-like, transcription modulator	0.000424914	0.00891141	-1.3971
ILMN_1759772	LRRC56	leucine rich repeat containing 56	0.000386851	0.00842172	-1.39724
ILMN_1748124	TSC22D3	TSC22 domain family, member 3	0.00107516	0.0155435	-1.39759
ILMN_1685079	TELO2	TEL2, telomere maintenance 2, homolog (S. cerevisiae)	0.00159304	0.0196766	-1.3986
ILMN_1726460	RPL14	ribosomal protein L14	6.21366e-05	0.00336772	-1.39964
ILMN_1687303	ACAD10	acyl-CoA dehydrogenase family, member 10	0.000120354	0.00448327	-1.4001
ILMN_1712095	FOXO4	forkhead box O4	0.000161933	0.00519869	-1.40117
ILMN_1716547	NAGK	N-acetylglucosamine kinase	0.00159298	0.0196766	-1.40135
ILMN_1812967	CNPY3	canopy 3 homolog (zebrafish)	0.00044366	0.0091085	-1.40137
ILMN_2076250	GPBP1L1	GC-rich promoter binding protein 1-like 1	0.000114038	0.00435162	-1.40148
ILMN_1692651	PHB	prohibitin	0.00143496	0.0183954	-1.40183
ILMN_1724424	PRRT2	proline-rich transmembrane protein 2	7.07905e-05	0.00349015	-1.40259
ILMN_1757882	PPP1R16A	protein phosphatase 1, regulatory (inhibitor) subunit 16A	8.76376e-06	0.0013456	-1.40606
ILMN_1772845	SNRNP35	small nuclear ribonucleoprotein 35kDa (U11/U12)	5.92799e-06	0.00110927	-1.40673
ILMN_1677452	REXO4	REX4, RNA exonuclease 4 homolog (S. cerevisiae)	5.09729e-05	0.00305303	-1.40678
ILMN_1719938	FGF11	fibroblast growth factor 11	0.000558406	0.010423	-1.40754
ILMN_1808272	KCNJ10	potassium inwardly-rectifying channel, subfamily J, member 10	0.00035207	0.00806157	-1.40778
ILMN_1712914	SEMA6B	sema domain, transmembrane domain (TM), and cytoplasmic domain, (semaphorin) 6B	0.000189668	0.00571389	-1.40845
ILMN_1772329	LRRFIP2	leucine rich repeat (in FLII) interacting protein 2	0.000644545	0.0114964	-1.4085
ILMN_1750130	GSPT1	G1 to S phase transition 1	0.00396171	0.0355267	-1.40932
ILMN_1732127	RBKS	ribokinase	0.000156872	0.005099	-1.40955
ILMN_1712545	S100A3	S100 calcium binding protein A3	0.000156825	0.005099	-1.41057
ILMN_1667626	EGLN3	egl nine homolog 3 (C. elegans)	0.00205672	0.023074	-1.4116
ILMN_2110084	ZNF124	zinc finger protein 124	0.0017752	0.0210347	-1.41209
ILMN_1685275	MCAM	melanoma cell adhesion molecule	0.000148807	0.00494741	-1.41211
ILMN_1738938	TIMM8B	translocase of inner mitochondrial membrane 8 homolog B (yeast)	0.000176257	0.00545655	-1.41258
ILMN_1718265	ATG5	ATG5 autophagy related 5 homolog (S. cerevisiae)	0.00500914	0.0414586	-1.41279
ILMN_2297205	ATRN	attractin	3.68267e-05	0.00260625	-1.41371
ILMN_1762678	NMT1	N-myristoyltransferase 1	3.55657e-05	0.00258429	-1.41388
ILMN_1670948	TSR2	TSR2, 20S rRNA accumulation, homolog (S. cerevisiae)	0.000422131	0.00888979	-1.41432
ILMN_2380163	PTPRF	protein tyrosine phosphatase, receptor type, F	0.000152692	0.00503284	-1.41456
ILMN_1693471	KLHL35	kelch-like 35 (Drosophila)	0.00501008	0.0414586	-1.41534
ILMN_1720266	C4orf21	chromosome 4 open reading frame 21	0.00219031	0.024076	-1.4154
ILMN_1740587	RPS11	ribosomal protein S11	0.000164394	0.00525321	-1.41591
ILMN_1705213	TMBIM1	transmembrane BAX inhibitor motif containing 1	0.000366204	0.00823978	-1.41659
ILMN_1685124	TCTN1	tectonic family member 1	0.00117306	0.0164232	-1.41727
ILMN_1764721	RPL8	ribosomal protein L8	0.000246478	0.00658808	-1.41732
ILMN_1791840	RALBP1	ralA binding protein 1	6.72739e-06	0.0011799	-1.41782
ILMN_1704557	RPS6KB1	ribosomal protein S6 kinase, 70kDa, polypeptide 1	6.34343e-05	0.00338518	-1.41844
ILMN_1742135	SPAG16	sperm associated antigen 16	0.000114874	0.00436352	-1.41942
ILMN_1768248	FOXP1	forkhead box P1	0.00147457	0.018797	-1.41965
ILMN_2414399	NME1	non-metastatic cells 1, protein (NM23A) expressed in	0.00276391	0.028009	-1.42129
ILMN_1797828	C20orf116	DDRGK domain containing 1	0.000804841	0.0129739	-1.42162
ILMN_1807169	TINAGL1	tubulointerstitial nephritis antigen-like 1	0.0057617	0.0450719	-1.42191
ILMN_1698770	C5orf33	chromosome 5 open reading frame 33	0.00132265	0.0175764	-1.42198
ILMN_1773363	CIITA	class II, major histocompatibility complex, transactivator	0.000679228	0.0118502	-1.42227
ILMN_2151739	CAT	catalase	0.000800978	0.0129718	-1.42234
ILMN_1652379	SUCLG2	succinate-CoA ligase, GDP-forming, beta subunit	0.000487999	0.00960743	-1.42328
ILMN_2143148	TM2D1	TM2 domain containing 1	0.0015616	0.0194313	-1.4237
ILMN_1706546	MAX	MYC associated factor X	0.000616077	0.0111204	-1.42413
ILMN_2348268	IFFO1	intermediate filament family orphan 1	8.51339e-05	0.00382675	-1.42428
ILMN_2404795	SULT1A1	sulfotransferase family, cytosolic, 1A, phenol-preferring, member 1	0.000356148	0.00812244	-1.42448
ILMN_1784766	MCM3AP	minichromosome maintenance complex component 3 associated protein	0.000710756	0.0121484	-1.42627
ILMN_2381037	LIMS1	LIM and senescent cell antigen-like domains 1	0.00583676	0.0454469	-1.42659
ILMN_1743427	SCYL3	SCY1-like 3 (S. cerevisiae)	0.000542581	0.0102914	-1.42776
ILMN_1805404	GRIN1	glutamate receptor, ionotropic, N-methyl D-aspartate 1	0.00348666	0.0326516	-1.42779
ILMN_1735108	ANKS6	ankyrin repeat and sterile alpha motif domain containing 6	0.000128171	0.00462755	-1.42812
ILMN_2407168	S100A13	S100 calcium binding protein A13	2.93166e-05	0.0023165	-1.42871
ILMN_1654583	CHD1	chromodomain helicase DNA binding protein 1	0.000817404	0.0130623	-1.4296
ILMN_2188722	GLS	glutaminase	0.000219849	0.0062107	-1.43099
ILMN_1704305	NIP7	nuclear import 7 homolog (S. cerevisiae)	0.00188738	0.0218948	-1.43108
ILMN_1719696	PLD1	phospholipase D1, phosphatidylcholine-specific	3.55683e-06	0.000834716	-1.43153
ILMN_2100209	CCL4L1	chemokine (C-C motif) ligand 4-like 1	7.24774e-05	0.00350874	-1.43196
ILMN_1780937	MUS81	MUS81 endonuclease homolog (S. cerevisiae)	0.000457304	0.00921721	-1.43197
ILMN_2380946	EIF4G2	eukaryotic translation initiation factor 4 gamma, 2	8.2294e-05	0.00374278	-1.43285
ILMN_1800843	SCAMP4	secretory carrier membrane protein 4	0.00422621	0.0371742	-1.43377
ILMN_2366473	ABCC9	ATP-binding cassette, sub-family C (CFTR/MRP), member 9	0.00588285	0.0456543	-1.43465
ILMN_1765159	ELMOD2	ELMO/CED-12 domain containing 2	0.00411159	0.0364	-1.43486
ILMN_1725311	GCGR	glucagon receptor	0.000549115	0.0103093	-1.43563
ILMN_1736939	UGCG	UDP-glucose ceramide glucosyltransferase	6.34686e-05	0.00338518	-1.43627
ILMN_2152010	CBWD1	COBW domain containing 1	7.03069e-05	0.00349015	-1.43731
ILMN_1699472	ST3GAL3	ST3 beta-galactoside alpha-2,3-sialyltransferase 3	0.000471893	0.00943374	-1.43793
ILMN_2395926	MANBAL	mannosidase, beta A, lysosomal-like	9.50755e-05	0.00402749	-1.43794
ILMN_2178618	WDR44	WD repeat domain 44	0.000135912	0.0047253	-1.4397
ILMN_2079786	NUAK1	NUAK family, SNF1-like kinase, 1	0.000270114	0.00699958	-1.44011
ILMN_1789624	TPM2	tropomyosin 2 (beta)	9.32888e-05	0.00400238	-1.44138
ILMN_1717982	BZW1	basic leucine zipper and W2 domains 1	2.86592e-05	0.00230334	-1.44277
ILMN_1800642	RELN	reelin	0.000149327	0.00495215	-1.44305
ILMN_1664698	UNC119	unc-119 homolog (C. elegans)	0.000226544	0.00630668	-1.44345
ILMN_1693669	WDR79	WD repeat containing, antisense to TP53	0.000142473	0.00485277	-1.44359
ILMN_1736562	TRIM39	tripartite motif-containing 39	0.00010705	0.00421518	-1.44528
ILMN_1756992	MUC1	mucin 1, cell surface associated	0.000415961	0.00881823	-1.44549
ILMN_2212999	KIF5C	kinesin family member 5C	0.000952328	0.0144197	-1.44562
ILMN_2104924	C21orf70	chromosome 21 open reading frame 70	0.000124633	0.00457014	-1.44572
ILMN_2208455	DDHD1	DDHD domain containing 1	0.000199894	0.00588083	-1.44744
ILMN_1692511	TMEM106C	transmembrane protein 106C	0.00010013	0.00410811	-1.44796
ILMN_1696450	KLK1	kallikrein 1	0.00178613	0.0210744	-1.44798
ILMN_2374352	DBNDD1	dysbindin (dystrobrevin binding protein 1) domain containing 1	4.58512e-05	0.00288482	-1.4496
ILMN_1672393	CUL7	cullin 7	0.00639294	0.0480248	-1.44971
ILMN_1708328	RAB11FIP3	RAB11 family interacting protein 3 (class II)	0.00222534	0.0243098	-1.4501
ILMN_1669928	ARHGEF16	Rho guanine nucleotide exchange factor (GEF) 16	0.00106939	0.0154936	-1.4511
ILMN_2204297	C14orf108	MU-2/AP1M2 domain containing, death-inducing	0.000484092	0.00957091	-1.45136
ILMN_1666894	CSPG4	chondroitin sulfate proteoglycan 4	0.000616482	0.0111204	-1.45175
ILMN_1749253	TUBD1	tubulin, delta 1	1.9209e-05	0.00188618	-1.45194
ILMN_1656656	COX19	COX19 cytochrome c oxidase assembly homolog (S. cerevisiae)	0.00135745	0.0178769	-1.45222
ILMN_1749006	RCSD1	RCSD domain containing 1	0.000460808	0.00926079	-1.4524
ILMN_2091920	PTCRA	pre T-cell antigen receptor alpha	0.000184873	0.00560921	-1.45337
ILMN_2405078	OSBPL8	oxysterol binding protein-like 8	4.63777e-06	0.000957925	-1.45394
ILMN_1682928	CPVL	carboxypeptidase, vitellogenic-like	0.00197304	0.0225153	-1.45509
ILMN_1717262	PROCR	protein C receptor, endothelial	0.000879116	0.0136809	-1.45553
ILMN_1692398	CNTNAP1	contactin associated protein 1	4.65329e-06	0.000957925	-1.45596
ILMN_1733851	DACT3	dapper, antagonist of beta-catenin, homolog 3 (Xenopus laevis)	4.54145e-05	0.00288482	-1.45665
ILMN_2268618	PHF20L1	PHD finger protein 20-like 1	0.000340426	0.00793932	-1.45726
ILMN_1787949	RPS15A	ribosomal protein S15a	0.00213298	0.0236229	-1.45751
ILMN_2266309	CEPT1	choline/ethanolamine phosphotransferase 1	0.00214964	0.0237605	-1.45835
ILMN_1790741	RNF126	ring finger protein 126	0.000179068	0.00550395	-1.45959
ILMN_1764029	FLJ40448	uncharacterized protein FLJ40448	3.66355e-05	0.00260534	-1.46015
ILMN_1809478	SSBP1	single-stranded DNA binding protein 1	0.00167498	0.0202308	-1.46085
ILMN_1713249	PHF19	PHD finger protein 19	0.00504231	0.0416498	-1.46146
ILMN_1757794	BRWD3	bromodomain and WD repeat domain containing 3	0.00220494	0.0241607	-1.46149
ILMN_1720344	NIPA2	non imprinted in Prader-Willi/Angelman syndrome 2	0.00511983	0.0420781	-1.46155
ILMN_2106931	PPP1R15B	protein phosphatase 1, regulatory (inhibitor) subunit 15B	0.000101856	0.00415566	-1.46176
ILMN_1727332	ATPIF1	ATPase inhibitory factor 1	0.0012902	0.0173615	-1.46321
ILMN_2140059	LAMA4	laminin, alpha 4	5.7819e-05	0.00326963	-1.46425
ILMN_1724811	PARN	poly(A)-specific ribonuclease (deadenylation nuclease)	5.01442e-05	0.00304158	-1.46472
ILMN_1658885	DAGLB	diacylglycerol lipase, beta	0.00028239	0.00721908	-1.46521
ILMN_2411236	NRCAM	neuronal cell adhesion molecule	0.000684778	0.0119095	-1.46575
ILMN_1714433	MARCKSL1	MARCKS-like 1	0.00470641	0.0398449	-1.46609
ILMN_1747195	PSMB8	proteasome (prosome, macropain) subunit, beta type, 8 (large multifunctional peptidase 7)	0.00198718	0.0226055	-1.46616
ILMN_1665943	MAP4K1	mitogen-activated protein kinase kinase kinase kinase 1	6.61671e-05	0.00341554	-1.46618
ILMN_1693771	ASPH	aspartate beta-hydroxylase	0.00431498	0.0376726	-1.46667
ILMN_1663195	MCM7	minichromosome maintenance complex component 7	0.00116669	0.016387	-1.46692
ILMN_1776352	MUTED	muted homolog (mouse)	0.00425347	0.0373859	-1.46701
ILMN_2073732	CBLL1	Cas-Br-M (murine) ecotropic retroviral transforming sequence-like 1	0.000129471	0.00463498	-1.46714
ILMN_1689274	NIPA1	non imprinted in Prader-Willi/Angelman syndrome 1	0.00125267	0.0170743	-1.46717
ILMN_1653718	ZFAND2B	zinc finger, AN1-type domain 2B	0.00641589	0.0480741	-1.4675
ILMN_2214603	PPP2R3C	protein phosphatase 2, regulatory subunit B'', gamma	0.00645481	0.0482122	-1.4681
ILMN_2415162	SEPW1	selenoprotein W, 1	0.00271827	0.0276637	-1.46823
ILMN_1705261	CAPN1	calpain 1, (mu/I) large subunit	0.000325899	0.00775679	-1.46838
ILMN_1670542	AK2	adenylate kinase 2	7.54618e-05	0.00357044	-1.46893
ILMN_1788387	UGCGL2	UDP-glucose glycoprotein glucosyltransferase 2	0.00220523	0.0241607	-1.46914
ILMN_2081988	LANCL1	LanC lantibiotic synthetase component C-like 1 (bacterial)	0.000225788	0.0062931	-1.46957
ILMN_2161832	VPS37A	vacuolar protein sorting 37 homolog A (S. cerevisiae)	0.000432098	0.00897478	-1.47025
ILMN_2196097	PPP2CA	protein phosphatase 2, catalytic subunit, alpha isozyme	0.00360011	0.0333943	-1.4713
ILMN_1665135	RBBP6	retinoblastoma binding protein 6	0.00519067	0.0423851	-1.47162
ILMN_1777449	IFT74	intraflagellar transport 74 homolog (Chlamydomonas)	1.80269e-05	0.00183907	-1.47162
ILMN_1658080	ZNF573	zinc finger protein 573	2.90703e-05	0.0023048	-1.47278
ILMN_1786105	PCBD1	pterin-4 alpha-carbinolamine dehydratase/dimerization cofactor of hepatocyte nuclear factor 1 alpha	0.0023313	0.0249366	-1.47337
ILMN_1802205	RHOB	ras homolog gene family, member B	0.0035549	0.0330664	-1.47386
ILMN_1666178	TP53I13	tumor protein p53 inducible protein 13	0.000133129	0.00467353	-1.47389
ILMN_1681269	DYRK4	dual-specificity tyrosine-(Y)-phosphorylation regulated kinase 4	0.000202097	0.00592112	-1.47397
ILMN_1741180	HEXDC	hexosaminidase (glycosyl hydrolase family 20, catalytic domain) containing	0.000166886	0.00530115	-1.47446
ILMN_2413084	HSPA8	heat shock 70kDa protein 8	0.00368853	0.0339327	-1.47478
ILMN_2147133	NBPF15	neuroblastoma breakpoint family, member 15	0.00534456	0.0431166	-1.47606
ILMN_2231189	HIAT1	hippocampus abundant transcript 1	6.03321e-05	0.00333155	-1.47755
ILMN_2052208	GADD45A	growth arrest and DNA-damage-inducible, alpha	0.00230635	0.0247714	-1.47792
ILMN_1735798	OSBPL3	oxysterol binding protein-like 3	0.000136932	0.00475373	-1.47803
ILMN_1731503	MARCO	macrophage receptor with collagenous structure	0.00228026	0.0246264	-1.47823
ILMN_2080760	SNX22	sorting nexin 22	0.000609459	0.0110361	-1.47862
ILMN_1782459	OSBPL8	oxysterol binding protein-like 8	0.00211737	0.0235388	-1.47907
ILMN_1761941	C4orf18	family with sequence similarity 198, member B	0.00516205	0.0423133	-1.47964
ILMN_2328813	DMAP1	DNA methyltransferase 1 associated protein 1	0.000146764	0.00492038	-1.48079
ILMN_1655177	PIK4CA	phosphatidylinositol 4-kinase, catalytic, alpha	0.00365299	0.0337115	-1.48103
ILMN_2320853	UBE2D3	ubiquitin-conjugating enzyme E2D 3 (UBC4/5 homolog, yeast)	1.82875e-05	0.00184987	-1.48186
ILMN_1707727	ANGPTL4	angiopoietin-like 4	4.86845e-05	0.00297533	-1.48193
ILMN_1712019	ANKRD17	ankyrin repeat domain 17	0.00194069	0.0222779	-1.48222
ILMN_1669273	PPT1	palmitoyl-protein thioesterase 1	0.000805844	0.0129739	-1.48306
ILMN_2379130	IRAK1	interleukin-1 receptor-associated kinase 1	0.00149946	0.0189292	-1.48312
ILMN_1802096	ABTB1	ankyrin repeat and BTB (POZ) domain containing 1	0.000105334	0.00419347	-1.48315
ILMN_1678678	SLC37A4	solute carrier family 37 (glucose-6-phosphate transporter), member 4	0.000173615	0.00541089	-1.48349
ILMN_2414762	TLR10	toll-like receptor 10	0.000897681	0.013878	-1.48357
ILMN_2399877	COG5	component of oligomeric golgi complex 5	7.94379e-05	0.00364106	-1.48422
ILMN_2045324	CCL16	chemokine (C-C motif) ligand 16	0.0003782	0.00834272	-1.48437
ILMN_1701308	COL1A1	collagen, type I, alpha 1	0.00058739	0.0107442	-1.48443
ILMN_1714623	TOMM22	translocase of outer mitochondrial membrane 22 homolog (yeast)	0.00427392	0.0374893	-1.48447
ILMN_1806010	CUL9	cullin 9	0.00517302	0.0423446	-1.48533
ILMN_1708107	DPT	dermatopontin	0.000255991	0.0067653	-1.48543
ILMN_1764158	NLGN2	neuroligin 2	5.82995e-05	0.00328099	-1.48567
ILMN_1811702	GRN	granulin	4.57133e-05	0.00288482	-1.48635
ILMN_1740351	KIAA0174	KIAA0174	0.000382894	0.00837937	-1.48695
ILMN_1746426	TOMM70A	translocase of outer mitochondrial membrane 70 homolog A (S. cerevisiae)	0.00012579	0.00459819	-1.48768
ILMN_2164152	ENPEP	glutamyl aminopeptidase (aminopeptidase A)	0.00570389	0.0447989	-1.48815
ILMN_1768812	FXYD6	FXYD domain containing ion transport regulator 6	0.000141436	0.00483146	-1.48865
[truncated: 1,555 more rows]
