# Supplementary material for: Transcriptional Profiling of Melanoma Sentinel Nodes Identify Patients with Poor Outcome and Reveal an Association of CD30+ T Lymphocytes with Progression
Source: Oxford University Press journal article supplement (doi:10.1158/0008-5472.can-13-1672), 2014-01-01
Supplement: 00085472can131672-sup-tab3.xlsx [file 00085472can131672-sup-tab3.xlsx]

## Sheet: Supplementary Table S3
Supplementary Table S3. Results generated by GSEA comparing the PN and the PP samples.
GENESETSa	description	SIZE	ES	NES	NOM p-val	FDR q-val	FWER p-val	RANK AT MAX	LEADING EDGE
MIPS_40S_RIBOSOMAL_SUBUNIT_CYTOPLASMIC	> 40S ribosomal subunit, cytoplasmic	29	-0.672489	-1.93265	0.00197628	0.106881	0.215	2460	tags=52%, list=13%, signal=60%
BASSO_B_LYMPHOCYTE_NETWORK	> Genes which comprise the top 1% of highly interconnected genes (major hubs) that account for most of gene interactions in the reconstructed regulatory networks from expression profiles in B lymphocytes.	126	-0.545826	-1.91396	0	0.115493	0.265	5270	tags=54%, list=29%, signal=75%
BILANGES_SERUM_AND_RAPAMYCIN_SENSITIVE_GENES	> Genes translationally regulated in MEF cells (embryonic fibroblasts) in response to serum starvation and by rapamycin (sirolimus) [PubChemID=6610346].	63	-0.634654	-1.91183	0.00610998	0.099064	0.27	2786	tags=46%, list=15%, signal=54%
ACEVEDO_NORMAL_TISSUE_ADJACENT_TO_LIVER_TUMOR_UP	> Genes up-regulated in normal tissue adjacent to liver tumor, compared to the normal liver samples.	150	-0.546261	-1.89796	0	0.0953368	0.323	4062	tags=53%, list=22%, signal=67%
JI_RESPONSE_TO_FSH_UP	> Genes up-regulated in MCV152 cells (ovarian cancer) treated with follicle stimulating hormone (FSH).	66	-0.501379	-1.8808	0	0.102041	0.384	3789	tags=41%, list=21%, signal=51%
PENG_GLUTAMINE_DEPRIVATION_DN	> Genes down-regulated in BJAB cells (B-lymphoma) after glutamine [PubChem=738] deprivation.	309	-0.482557	-1.87898	0	0.0954585	0.388	4566	tags=44%, list=25%, signal=58%
MALONEY_RESPONSE_TO_17AAG_DN	> Down-regulated genes in A2780 cells (ovarian cancer) treated with 17AAG [PubChem=6440175], a chemical with anticancer properties.	70	-0.543741	-1.87395	0.00587084	0.0863107	0.406	3441	tags=44%, list=19%, signal=54%
REACTOME_FORMATION_OF_THE_TERNARY_COMPLEX_AND_SUBSEQUENTLY_THE_43S_COMPLEX	> Genes involved in Formation of the ternary complex, and subsequently, the 43S complex	46	-0.627108	-1.87105	0.00798403	0.0831477	0.416	2749	tags=48%, list=15%, signal=56%
BIOCARTA_PAR1_PATHWAY	> Thrombin signaling and protease-activated receptors	35	-0.573311	-1.86061	0	0.0904139	0.449	4162	tags=51%, list=23%, signal=66%
CHEOK_RESPONSE_TO_HD_MTX_DN	> Genes specifically down-regulated in pediatric acute lymphoblastic leukemia (ALL) patients by high-dose methotrexate (HDMTX) [PubChem=4112].	23	-0.618054	-1.85989	0	0.0860605	0.453	2910	tags=48%, list=16%, signal=57%
KEGG_PROTEIN_EXPORT	> Protein export	22	-0.710446	-1.83078	0.00603622	0.125706	0.553	4359	tags=68%, list=24%, signal=89%
REACTOME_SRP_DEPENDENT_COTRANSLATIONAL_PROTEIN_TARGETING_TO_MEMBRANE	> Genes involved in SRP-dependent cotranslational protein targeting to membrane	106	-0.554337	-1.81731	0.0140845	0.12824	0.601	2786	tags=40%, list=15%, signal=46%
LUI_THYROID_CANCER_PAX8_PPARG_DN	> Top down-regulated genes distinguishing between follicular thyroid carcinoma (FTC) samples by the presence or absence of the PAX8-PPARG [GeneID=7849;5468] fusion protein.	42	-0.576496	-1.81371	0	0.12217	0.609	2749	tags=50%, list=15%, signal=59%
WINNEPENNINCKX_MELANOMA_METASTASIS_DN	> Genes from the 254-gene classifier which were down-regulated in melanoma patients with a reported distant metastasis within 4 years.	40	-0.53828	-1.80108	0	0.128365	0.65	3225	tags=43%, list=18%, signal=51%
DAZARD_UV_RESPONSE_CLUSTER_G2	> Cluster G2: genes increasingly up-regulated in NHEK cells (normal keratinocyte) and reaching maximum levels at 12 h and 24 h after UV-B irradiation.	29	-0.59152	-1.79686	0	0.129972	0.663	3464	tags=48%, list=19%, signal=59%
PELLICCIOTTA_HDAC_IN_ANTIGEN_PRESENTATION_UP	> Antigen processing and presentation genes up-regulated in JY cells (B lymphocytes) treated with TSA [PubChem=5562].	64	-0.509222	-1.79636	0	0.125933	0.668	4518	tags=48%, list=25%, signal=64%
HOLLEMAN_VINCRISTINE_RESISTANCE_ALL_DN	> Genes distinguishing vincristine [PubChem=5978] resistant and sensitive ALL (B- and T-lineage ALL); here - genes down-regulated in the drug resistant samples.	19	-0.703184	-1.79464	0.00199203	0.124077	0.674	2732	tags=58%, list=15%, signal=68%
CHENG_RESPONSE_TO_NICKEL_ACETATE	> Genes down-regulated in HPL1D cells (lung epithelium) upon exposure to nickel acetate [PubChem=9756].	39	-0.564428	-1.79083	0.00394477	0.117563	0.685	3756	tags=51%, list=20%, signal=64%
HAHTOLA_MYCOSIS_FUNGOIDES_CD4_DN	> Genes down-regulated in T helper cells (defines as CD4+) isolated from patients with mucosis fungoides compared to those from normal control donors.	107	-0.523533	-1.7905	0.00204082	0.114281	0.685	4337	tags=49%, list=24%, signal=63%
BIOCARTA_CXCR4_PATHWAY	> CXCR4 Signaling Pathway	23	-0.664192	-1.78596	0.00390625	0.117459	0.703	3286	tags=61%, list=18%, signal=74%
AMUNDSON_POOR_SURVIVAL_AFTER_GAMMA_RADIATION_2G	> Genes with basal expression distinguishing NCI-60 cell lines with poor survival after 2 Gy gamma irradiation.	151	-0.456163	-1.78456	0	0.115827	0.707	4928	tags=44%, list=27%, signal=60%
LEE_EARLY_T_LYMPHOCYTE_DN	> Genes down-regulated at early stages of progenitor T lymphocyte maturation compared to the late stages.	48	-0.578277	-1.78223	0.00628931	0.113375	0.715	3256	tags=42%, list=18%, signal=50%
HAHTOLA_SEZARY_SYNDROM_UP	> Genes up-regulated in monocytes isolated from peripheral blood samples of Sezary syndrom patients compared to those from healthy normal donors.	92	-0.489466	-1.78169	0	0.111103	0.716	4211	tags=45%, list=23%, signal=58%
REACTOME_SIGNALING_BY_THE_B_CELL_RECEPTOR_BCR	> Genes involved in Signaling by the B Cell Receptor (BCR)	114	-0.474674	-1.77455	0	0.115684	0.737	5102	tags=49%, list=28%, signal=68%
BIOCARTA_MYOSIN_PATHWAY	> PKC-catalyzed phosphorylation of inhibitory phosphoprotein of myosin phosphatase	30	-0.576668	-1.77442	0.00209205	0.113064	0.738	3590	tags=50%, list=20%, signal=62%
NUTT_GBM_VS_AO_GLIOMA_DN	> Top 50 marker genes for anaplastic oligodendroglioma (AO), a class of high grade glioma.	43	-0.527902	-1.7719	0.00601202	0.114676	0.746	3348	tags=49%, list=18%, signal=60%
HOEBEKE_LYMPHOID_STEM_CELL_UP	> Genes up-regulated in the common lymphoid progenitor (CLP, defined as CD34+CD38-CD7+ [GeneID=947;952;924]) compared to a multipotent cord blood cell (defined as CD34+CD38+CD7-).	81	-0.480886	-1.77138	0.0020284	0.112774	0.746	4017	tags=40%, list=22%, signal=50%
KYNG_ENVIRONMENTAL_STRESS_RESPONSE_NOT_BY_GAMMA_IN_WS	> Human environmental stress response genes not changed in primary fibroblasts from Werner syndrom (WS) patients in response to gamma radiation.	32	-0.602305	-1.76737	0	0.113604	0.763	4863	tags=59%, list=26%, signal=81%
WANG_TUMOR_INVASIVENESS_UP	> Up-regulated genes in the subpopulation of invasive PyMT cells (breast cancer) compared to the general population of PyMT cells.	336	-0.444219	-1.76415	0.00614754	0.113553	0.77	4707	tags=43%, list=26%, signal=57%
MARSON_FOXP3_CORE_DIRECT_TARGETS	> Direct FOXP3 [GeneID=50943] targets that exhibit consistent transcriptional behavior in hybridoma and in ex vivo T lymphocytes.	18	-0.674447	-1.76302	0	0.112532	0.771	3610	tags=56%, list=20%, signal=69%
MARSON_FOXP3_TARGETS_DN	> Genes down-regulated by FOXP3 [GeneID=50943] in both ex vivo and hybridoma cells.	48	-0.566079	-1.76166	0.00803213	0.111837	0.773	3765	tags=48%, list=20%, signal=60%
REACTOME_ANTIGEN_ACTIVATES_B_CELL_RECEPTOR_LEADING_TO_GENERATION_OF_SECOND_MESSENGERS	> Genes involved in Antigen Activates B Cell Receptor Leading to Generation of Second Messengers	29	-0.585567	-1.75694	0	0.109391	0.786	4884	tags=52%, list=27%, signal=70%
REACTOME_TRNA_AMINOACYLATION	> Genes involved in tRNA Aminoacylation	40	-0.56209	-1.75338	0.00205761	0.10999	0.794	4073	tags=45%, list=22%, signal=58%
DER_IFN_GAMMA_RESPONSE_UP	> Genes up-regulated in HT1080 (fibrosarcoma) cells by treatment with interferon gamma for 6 h.	69	-0.503762	-1.7503	0	0.112785	0.804	5380	tags=57%, list=29%, signal=80%
PID_CXCR4_PATHWAY	> CXCR4-mediated signaling events	98	-0.48708	-1.74862	0	0.112906	0.807	5182	tags=53%, list=28%, signal=73%
REACTOME_UNFOLDED_PROTEIN_RESPONSE	> Genes involved in Unfolded Protein Response	75	-0.488435	-1.74846	0	0.111238	0.809	4613	tags=52%, list=25%, signal=69%
BASSO_CD40_SIGNALING_UP	> Gene up-regulated by CD40 [GeneID=958] signaling in Ramos cells (EBV negative Burkitt lymphoma).	94	-0.52469	-1.74557	0.00401606	0.112376	0.81	4933	tags=55%, list=27%, signal=75%
PENG_RAPAMYCIN_RESPONSE_DN	> Genes down-regulated in BJUB cells (B-lymphoma) in response to rapamycin [PubChem=6610346] treatment.	229	-0.433865	-1.74506	0.00201613	0.111108	0.811	5630	tags=48%, list=31%, signal=68%
PID_EPHA2_FWDPATHWAY	> EPHA2 forward signaling	18	-0.596216	-1.73305	0.00776699	0.121968	0.851	4720	tags=56%, list=26%, signal=75%
OSMAN_BLADDER_CANCER_DN	> Genes down-regulated in blood samples from bladder cancer patients.	322	-0.440921	-1.73208	0.0020284	0.121718	0.853	4805	tags=45%, list=26%, signal=60%
SESTO_RESPONSE_TO_UV_C6	> Cluster 6: genes changed in primary keratinocytes by UVB irradiation.	35	-0.514119	-1.73137	0	0.120937	0.853	3984	tags=43%, list=22%, signal=55%
KEGG_SPLICEOSOME	> Spliceosome	103	-0.506939	-1.73037	0.00610998	0.120654	0.855	5719	tags=56%, list=31%, signal=81%
REACTOME_LOSS_OF_NLP_FROM_MITOTIC_CENTROSOMES	> Genes involved in Loss of Nlp from mitotic centrosomes	49	-0.523404	-1.72988	0.00204499	0.11948	0.857	3871	tags=47%, list=21%, signal=59%
JIANG_AGING_HYPOTHALAMUS_UP	> Up-regulated in the hypothalamus of aged (22 months) BALB/c mice, compared to young (2 months) controls	44	-0.558634	-1.72756	0.00793651	0.117873	0.861	5674	tags=64%, list=31%, signal=92%
PID_FAK_PATHWAY	> Signaling events mediated by focal adhesion kinase	57	-0.495213	-1.72708	0	0.115374	0.862	4538	tags=46%, list=25%, signal=60%
GAZDA_DIAMOND_BLACKFAN_ANEMIA_ERYTHROID_UP	> Genes up-regulated in erythroid progenitor cells isolated from bone marrow of patients with Diamond-Blackfan anemia (DBA) and mutated RPS19 [GeneID=6223].	19	-0.628299	-1.72463	0.00996016	0.117133	0.863	5240	tags=63%, list=28%, signal=88%
REACTOME_GPVI_MEDIATED_ACTIVATION_CASCADE	> Genes involved in GPVI-mediated activation cascade	30	-0.570148	-1.72414	0.00194175	0.116471	0.864	5035	tags=57%, list=27%, signal=78%
PARK_TRETINOIN_RESPONSE_AND_PML_RARA_FUSION	> Genes up-regulated by tretinoin (all-trans retinoic acid, ATRA) [PubChem=5538] in U937 cells (acute promyelocytic leukemia, APL) made sensitive to the drug by expression of the PML-RARA fusion [GeneID=5371;5914].	30	-0.60901	-1.72194	0.00808081	0.11817	0.867	4058	tags=50%, list=22%, signal=64%
BIOCARTA_MCALPAIN_PATHWAY	> mCalpain and friends in Cell motility	24	-0.593899	-1.72112	0	0.117945	0.867	4986	tags=58%, list=27%, signal=80%
KEGG_B_CELL_RECEPTOR_SIGNALING_PATHWAY	> B cell receptor signaling pathway	72	-0.492911	-1.714	0	0.122307	0.882	5035	tags=53%, list=27%, signal=72%
DER_IFN_BETA_RESPONSE_UP	> Genes up-regulated in HT1080 (fibrosarcoma) cells by treatment with interferon beta for 6 h.	99	-0.467909	-1.71158	0.00204499	0.124583	0.887	4155	tags=41%, list=23%, signal=53%
TONKS_TARGETS_OF_RUNX1_RUNX1T1_FUSION_GRANULOCYTE_UP	> Genes up-regulated in granulocytes by RUNX1-RUNX1T1 [GeneID=861;862] fusion.	48	-0.499926	-1.70941	0.00616016	0.124696	0.888	5020	tags=54%, list=27%, signal=74%
LI_AMPLIFIED_IN_LUNG_CANCER	> Genes with increased copy number that correlates with increased expression across six different lung adenocarcinoma cell lines.	175	-0.421481	-1.7091	0.00197239	0.123565	0.889	4678	tags=39%, list=25%, signal=52%
PLASARI_TGFB1_SIGNALING_VIA_NFIC_1HR_UP	> Genes up-regulated after 1 h of TGFB1 [GeneID=7040] stimulation in MEF cells (embryonic fibroblast) with NFIC [GeneID=4782] knockout vs wild type MEFs.	32	-0.502049	-1.70832	0.0039604	0.123443	0.894	3740	tags=41%, list=20%, signal=51%
REACTOME_ACTIVATION_OF_CHAPERONE_GENES_BY_XBP1S	> Genes involved in Activation of Chaperone Genes by XBP1(S)	44	-0.535422	-1.70714	0.00406504	0.123722	0.896	4613	tags=50%, list=25%, signal=67%
PID_CXCR3PATHWAY	> CXCR3-mediated signaling events	40	-0.495422	-1.70491	0	0.125531	0.9	5764	tags=52%, list=31%, signal=76%
VALK_AML_CLUSTER_6	> Top 40 genes from cluster 6 of acute myeloid leukemia (AML) expression profile; all samples are FAB M1 or M2 subtypes and all samples have internal tundem duplication of FLT3 [GeneID=2322].	30	-0.565859	-1.70473	0.0039604	0.12429	0.9	3854	tags=47%, list=21%, signal=59%
PICCALUGA_ANGIOIMMUNOBLASTIC_LYMPHOMA_UP	> Up-regulated genes in angioimmunoblastic lymphoma (AILT) compared to normal T lymphocytes.	195	-0.497025	-1.70435	0.00596422	0.122306	0.901	4501	tags=44%, list=24%, signal=57%
a. 58 genesets resulting downregulated in the SNB-PP samples are listed according to NES values.
Color coded pathways : green, immune response ; blue, gene transcription_translation.
Cut-off is taken at FDR<0.25, nominal p value < 0.01, NES<-1.7 and leading edge signal>50%.
Further description of the gene sets can be found in the MsigDB database (www.broad.mit.edu/gsea/msigdb).
