# Supplementary material for: Transcriptional Profiling of Melanoma Sentinel Nodes Identify Patients with Poor Outcome and Reveal an Association of CD30+ T Lymphocytes with Progression
Source: Oxford University Press journal article supplement (doi:10.1158/0008-5472.can-13-1672), 2014-01-01
Supplement: 00085472can131672-sup-tab4.xlsx [file 00085472can131672-sup-tab4.xlsx]

## Sheet: Supplementary Table S4
Supplementary Table S4. Genes found to be differentially expressed between the PP and the PN samples, as confirmed by qPCR.
Regulation in PPa	Fold Changeb	Gene Symbol	Protein	Expression	Reference
↑	39.7-2.9	TNFRSF8	CD30 membrane protein	activated T and B lymphocytes	28
↑	1.6- 1.5	BSG	basigin, CD147 membrane protein	several cell types, including Tregs cells and activated myeloid cells	15
↑	3.3-3.4	DEFA1	Defensin 1 alpha secreted microbicidal and cytotoxic peptide	immune cells	31
↑	4.1-12.1	IL-17B	Interleukin 17B secreted cytokine	monocytes and non-immune cells under inflammatory conditions	38
↑	4.1-1.9	CST6	cystatin M/E secreted inhibitor of cathepsin proteases	most tissues	39
↓	0.5-0.6	CD68	CD68 lysosomal/endosomal-associated membrane glycoprotein	immune cells, fibroblasts, endothelial cells and different tumor types	40
↓	0.8-0.3	ADAM22	membrane-anchored metallopeptidase	several tissues including brain and glioma	41
↓	0.5-0.4	MUM1	melanoma ubiquitous mutated chromatin associated protein	ubiquitous	42
a. regulation in PP samples as resulting from class comparison between PP and PN, ↑ indicating upregulation and ↓ indicating downregulation in PP samples.
b. as resulting by qPCR detection in training and validation samples (see Fig. 3 and Supplementary Fig. S3).
38. Iwakura Y, Ishigame H, Saijo S, Nakae S. Functional specialization of interleukin-17 family members. Immunity 2011;34:149-62.
39. Zeeuwen PL, Cheng T, Schalkwijk J. The biology of cystatin M/E and its cognate target proteases. J Invest Dermatol 2009;129:1327-38.
40. Falini B, Flenghi L, Pileri S, Gambacorta M, Bigerna B, Durkop H, et al. PG-M1: A new monoclonal antibody directed against a fixative-resistant epitope on the macrophage-restricted form of the CD68
molecule. Am J Pathol 1993;142:1359-72.
41. Zhu P, Sang Y, Xu H, Zhao J, Xu R, Sun Y, et al. ADAM22 plays an important role in cell adhesion and spreading with the assistance of 14-3-3. Biochem Biophys Res Commun 2005;331:938-46.
42. Huen MS, Huang J, Leung JW, Sy SM, Leung KM, Ching YP, et al. Regulation of chromatin architecture by the PWWP domain-containing DNA damage-responsive factor EXPAND1/MUM1. Mol Cell 2010;
37:854-64.
